# Supplementary material for: Diastereoselective synthesis of spiro[indene-2,2′-pyrazolo[1,2-a]pyrazoles] and spiro[indoline-3,2′-pyrazolo[1,2-a]pyrazoles] via 1,3-dipolar cycloaddition
Source: Royal Society of Chemistry journal article supplement (doi:10.1039/c6ra02358d), 2016-01-01

**Diastereoselective synthesis of spiro[indene-2,2'-pyrazolo[1,2-a]pyrazoles] and  
spiro[indoline-3,2'-pyrazolo[1,2-a]pyrazoles] via 1,3-dipolar cycloaddition**

Yu-Ling Lu, Jing Sun\*, Yan-Hong Jiang, Chao-Guo Yan\*

**Supporting Information**

|                                                                            |             |
|----------------------------------------------------------------------------|-------------|
| <b>Figures s1-s4</b>                                                       | <b>2-3</b>  |
| <b><sup>1</sup>H, <sup>13</sup>C NMR and HRMS spectra of new compounds</b> | <b>4-44</b> |

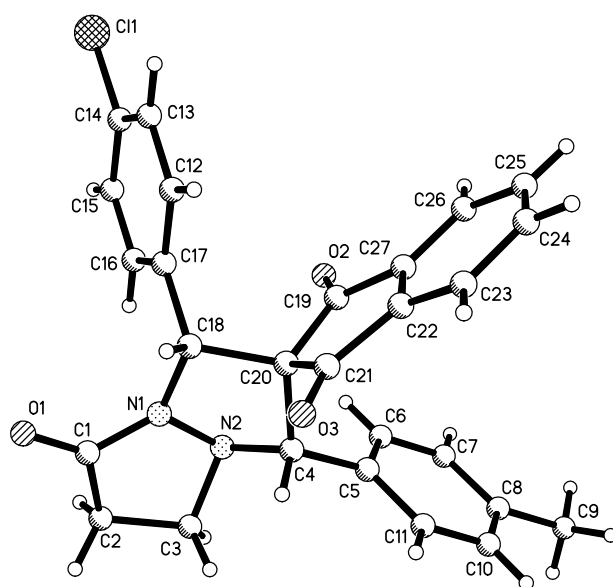

Fig s1. Molecular structure of compound 1e

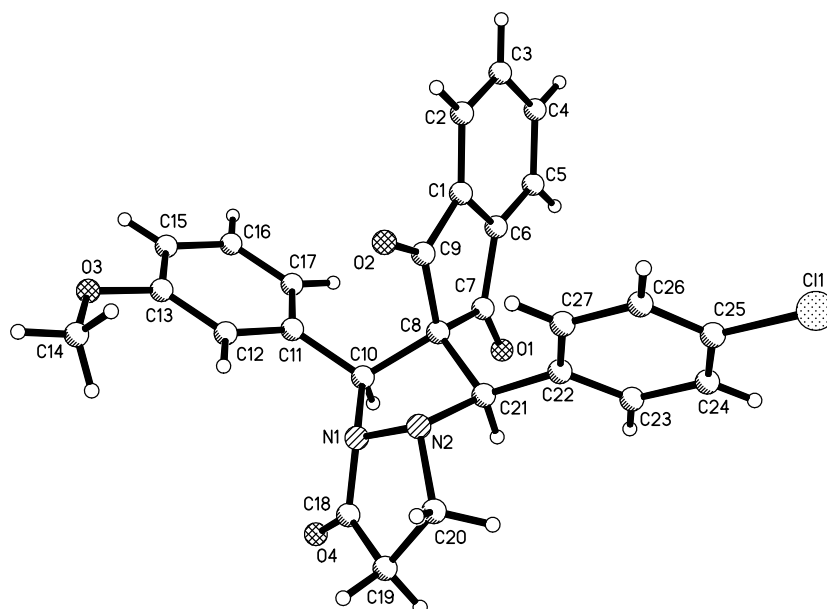

Fig. s2 Molecular structure of compound 1k

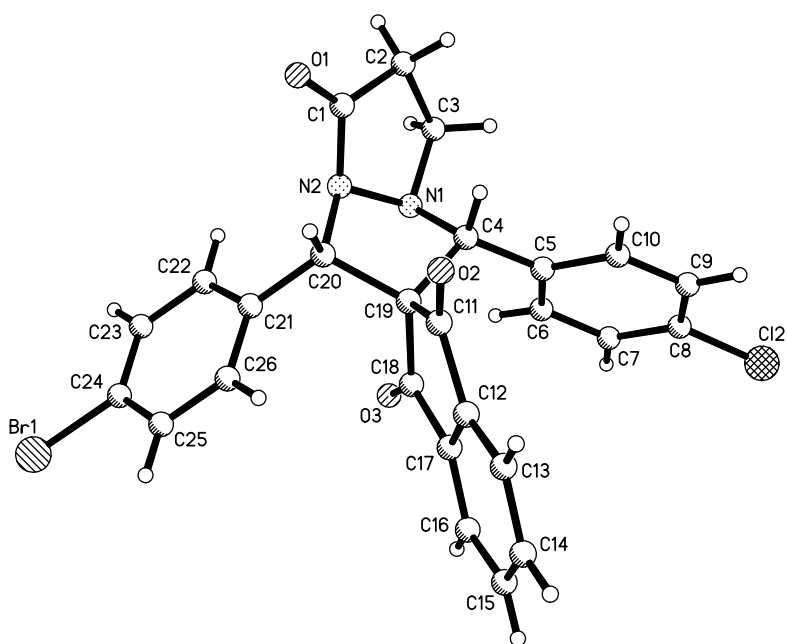

Fig. s3 Molecular structure of compound **1m**

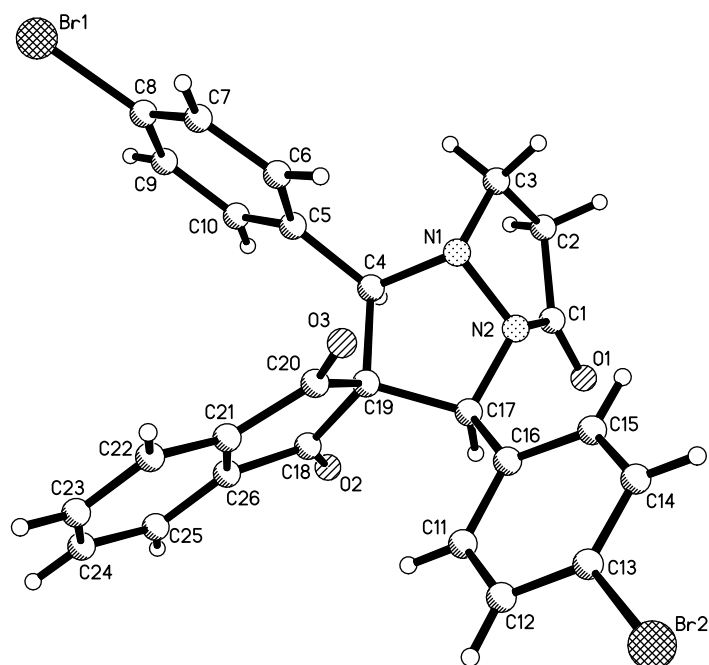

Fig. s4 Molecular structure of compound **1o**

**3'-(3-Methoxyphenyl)-1'-phenyl-6',7'-dihydro-1'H-spiro[indene-2,2'-pyrazolo[1,2-a]pyrazole]-1,3,5'(3'H)-trione (1a):**

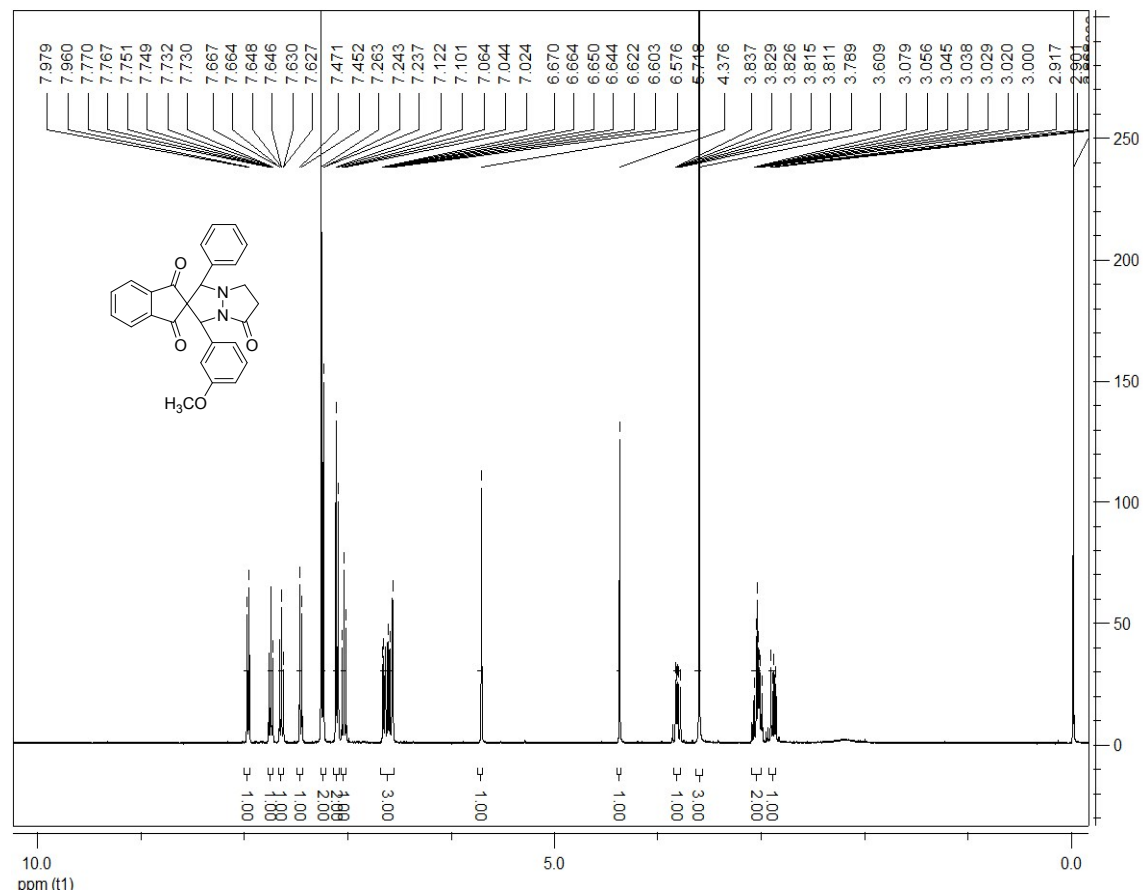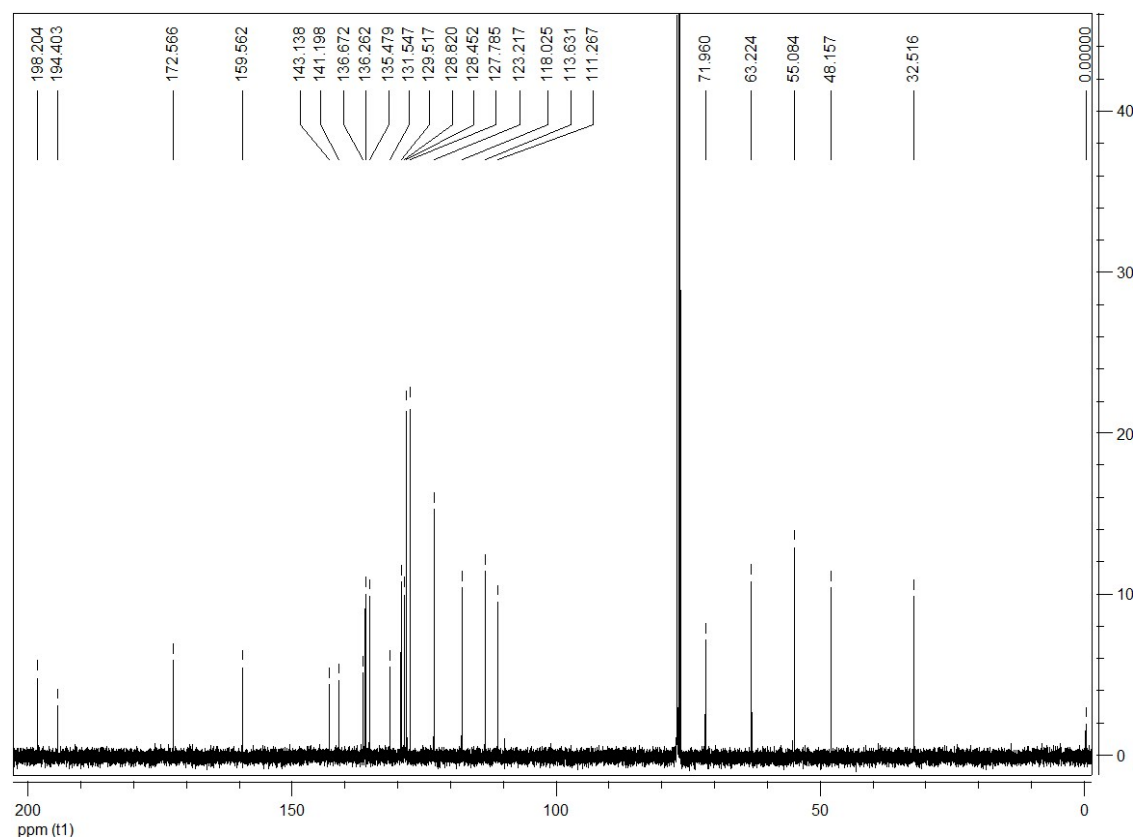

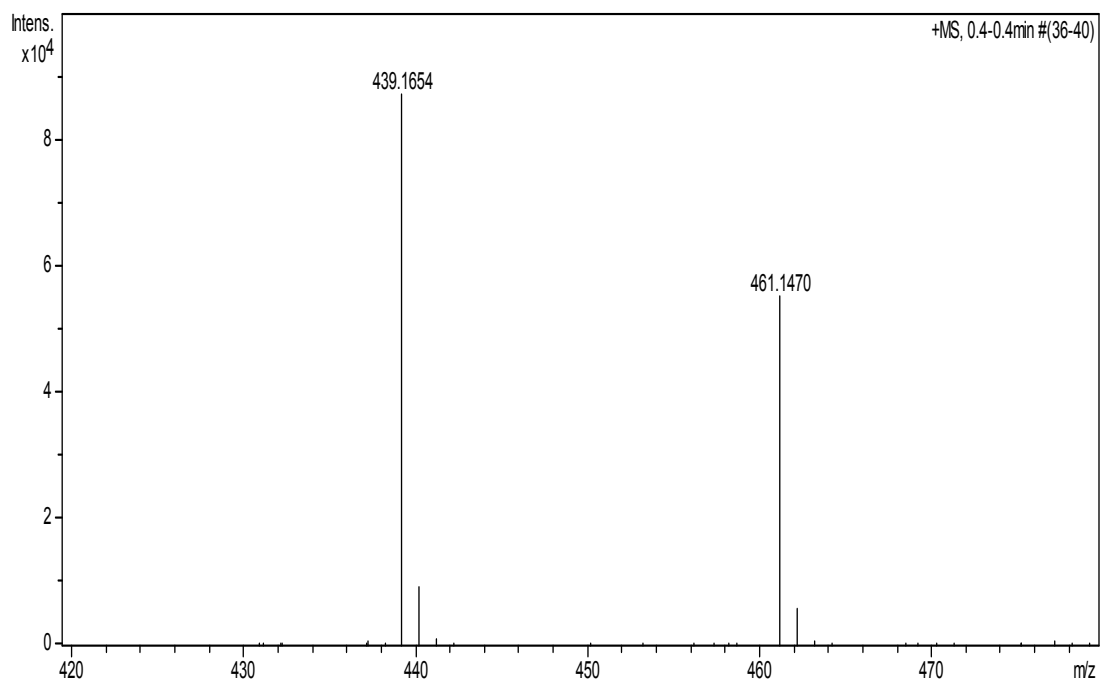

**3'-(4-Bromophenyl)-1'-phenyl-6',7'-dihydro-1'H-spiro[indene-2,2'-pyrazolo[1,2-a]pyrazole]-1,3,5'(3'H)-trione (1b):**

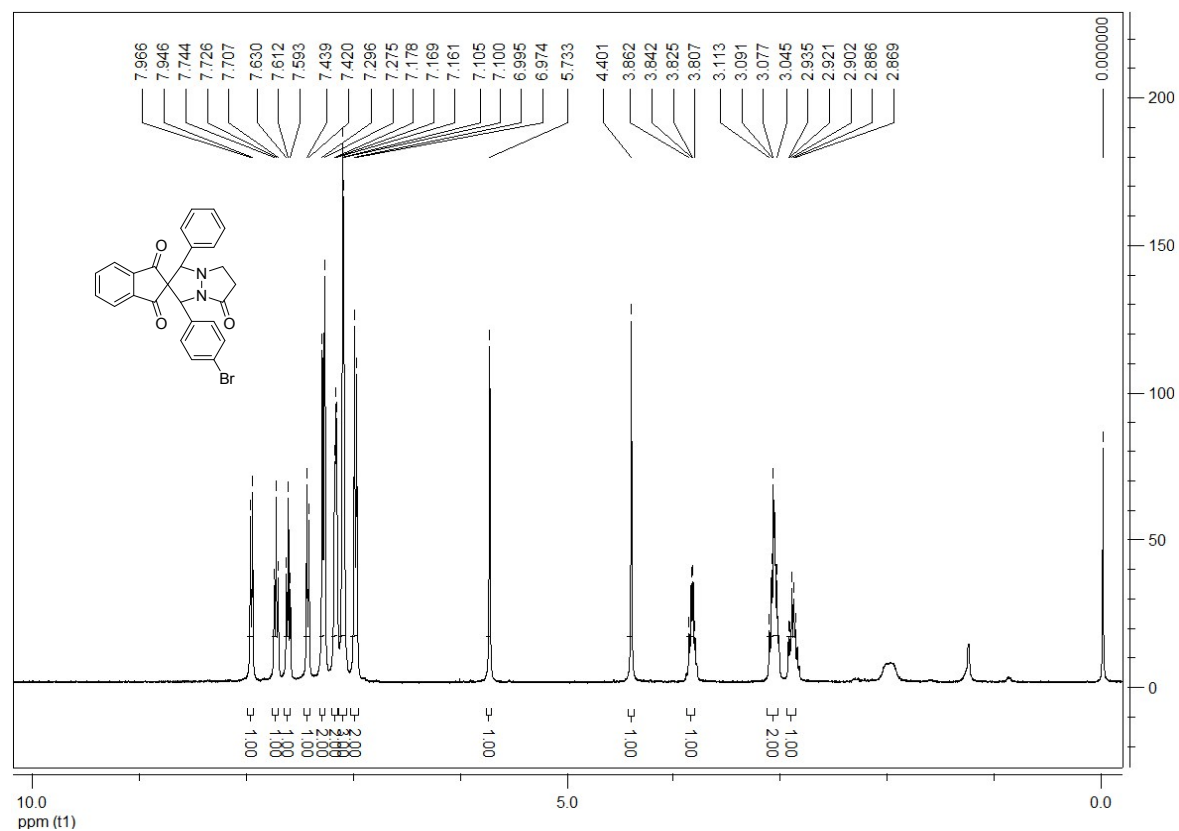

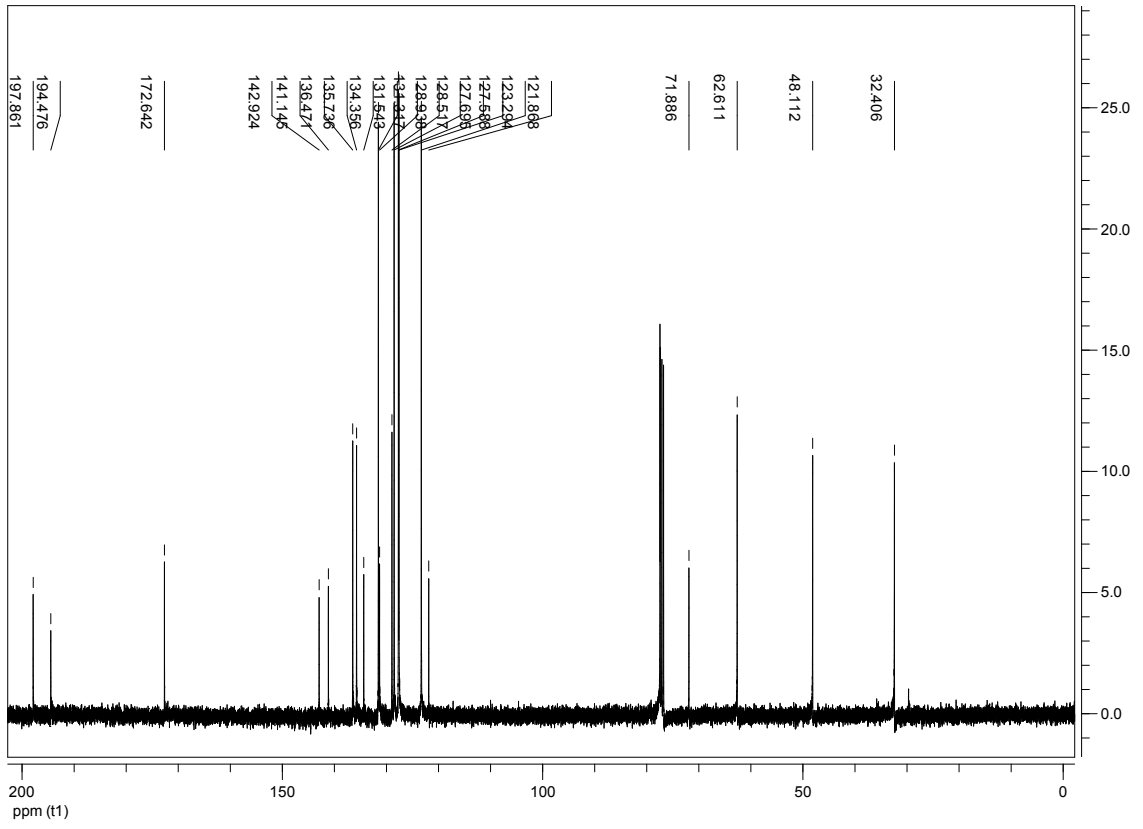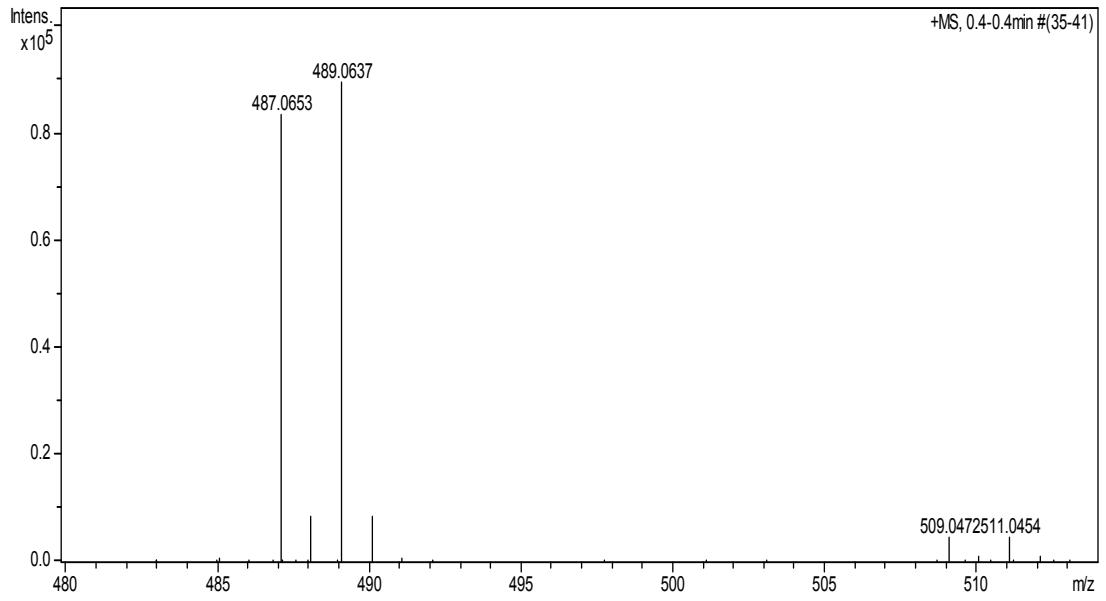

1',3'-Di-p-tolyl-6',7'-dihydro-1'H-spiro[indene-2,2'-pyrazolo[1,2-a]pyrazole]-1,3,5'(3'H)-trione (1c):

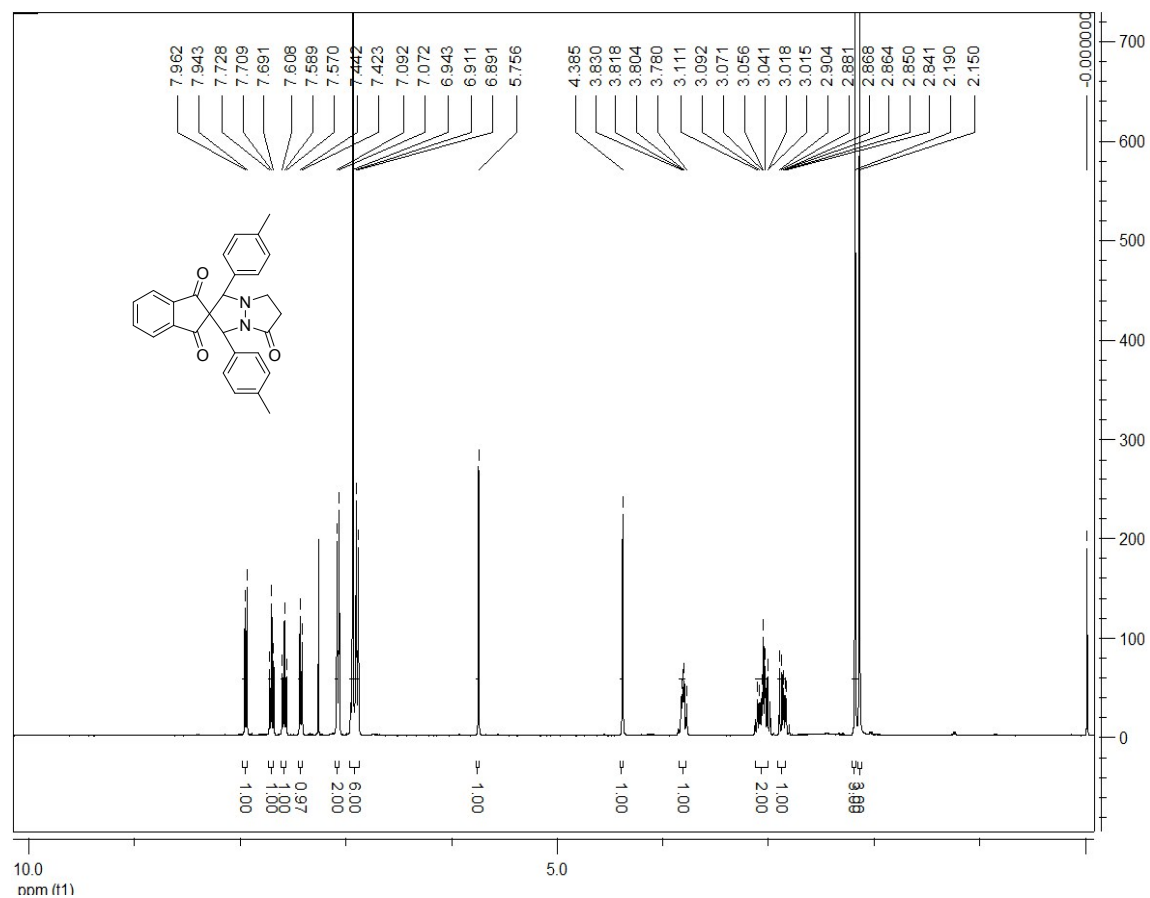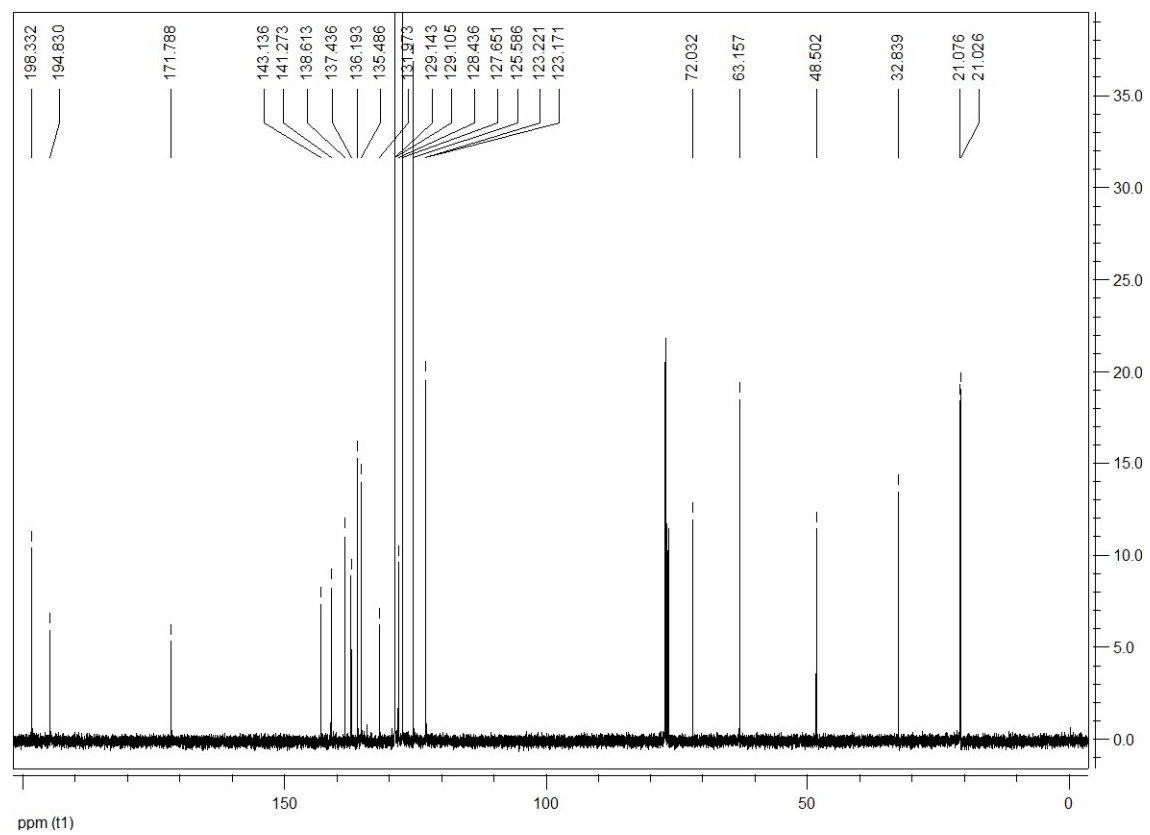

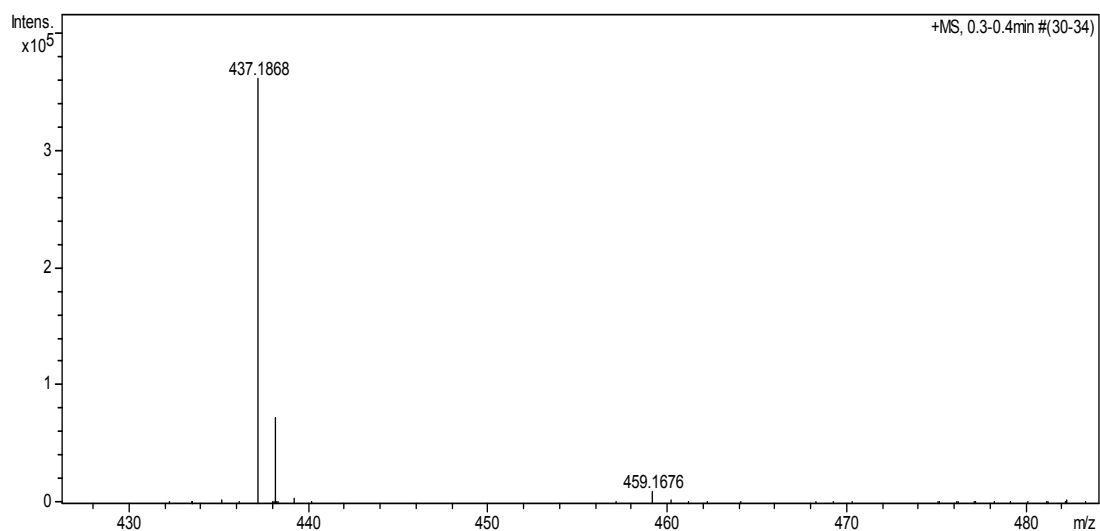

**3'-(3-Methoxyphenyl)-1'-(p-tolyl)-6',7'-dihydro-1'H-spiro[indene-2,2'-pyrazolo[1,2-a]pyrazole]-1,3,5'(3'H)-trione (1d):**

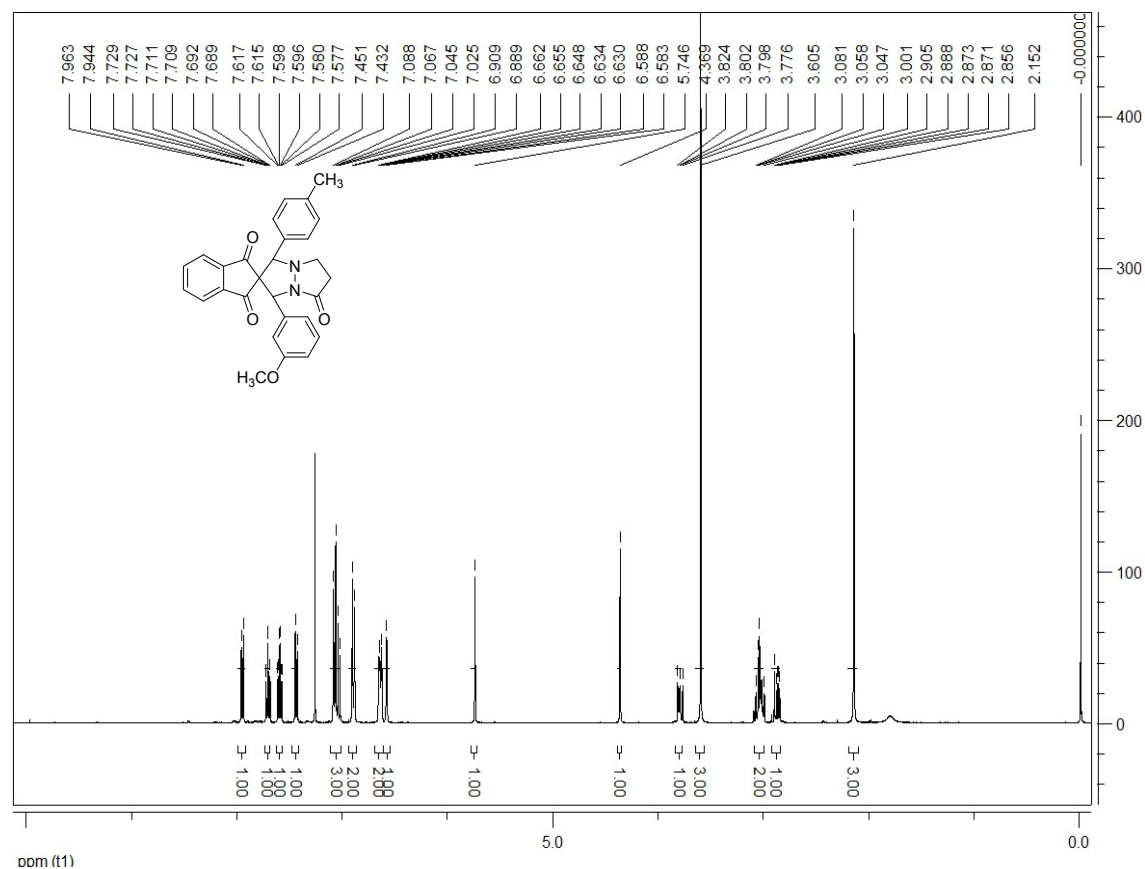



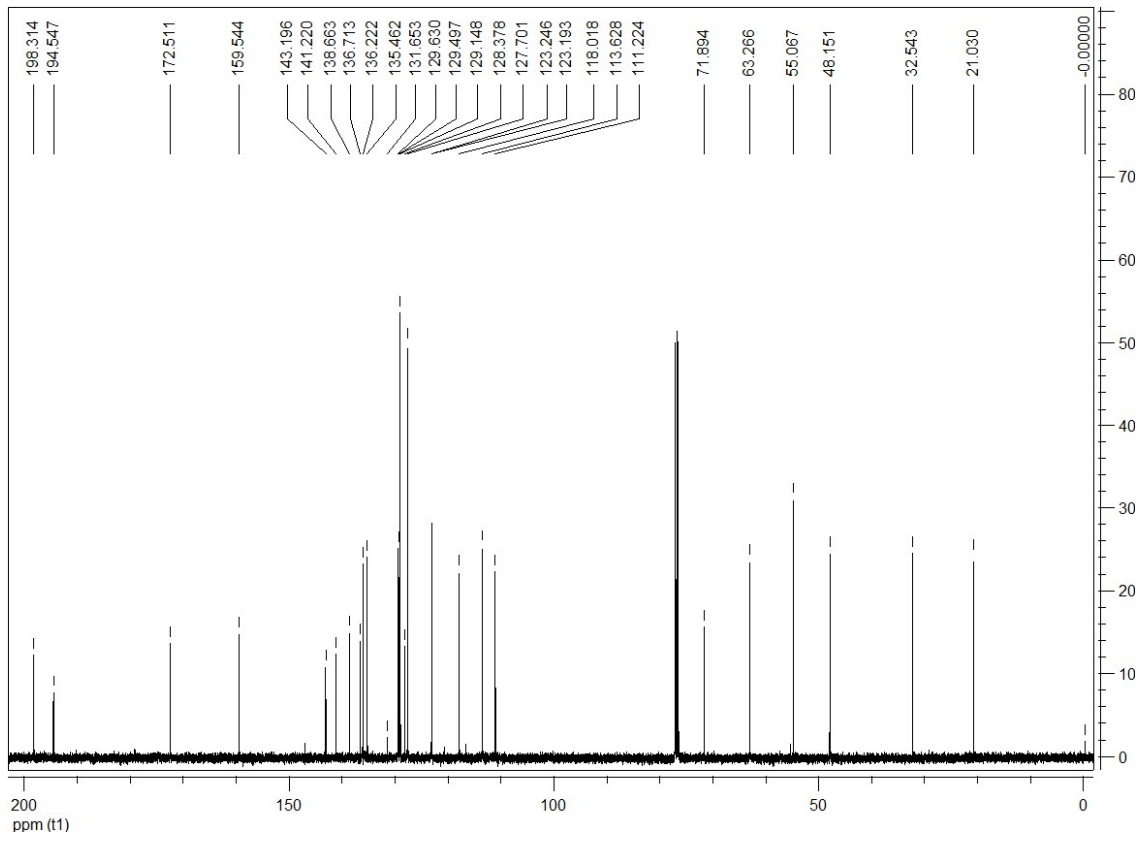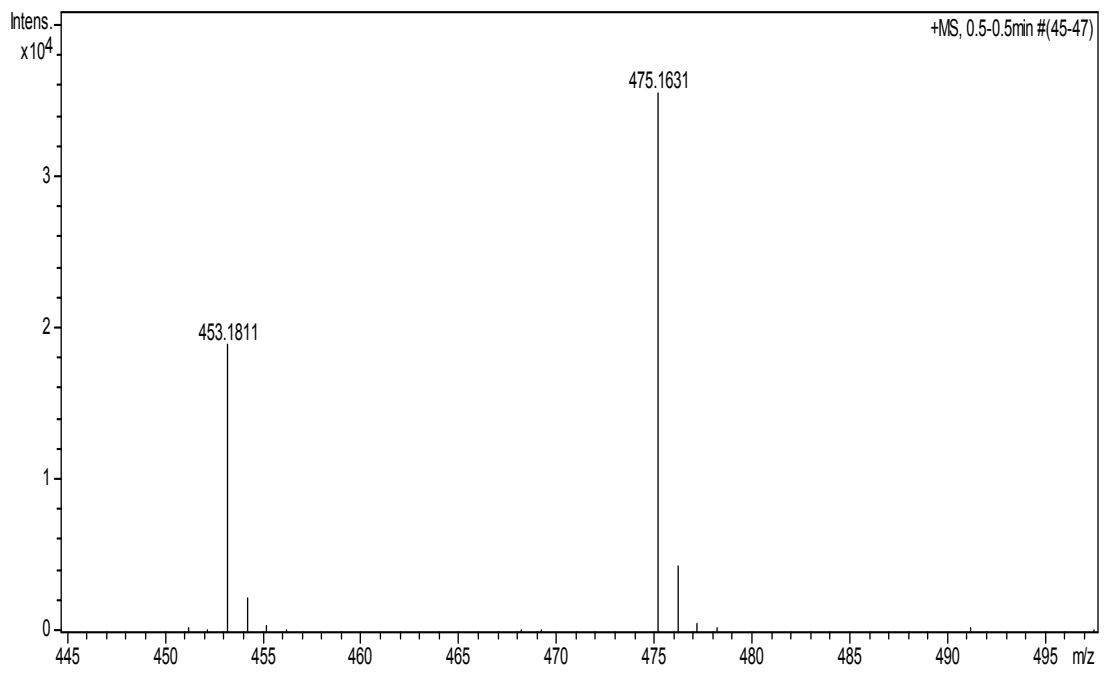

**3'-(4-Chlorophenyl)-1'-(p-tolyl)-6',7'-dihydro-1'H-spiro[indene-2,2'-pyrazolo[1,2-a]pyrazole]-1,3,5'(3'H)-trione (1e):**

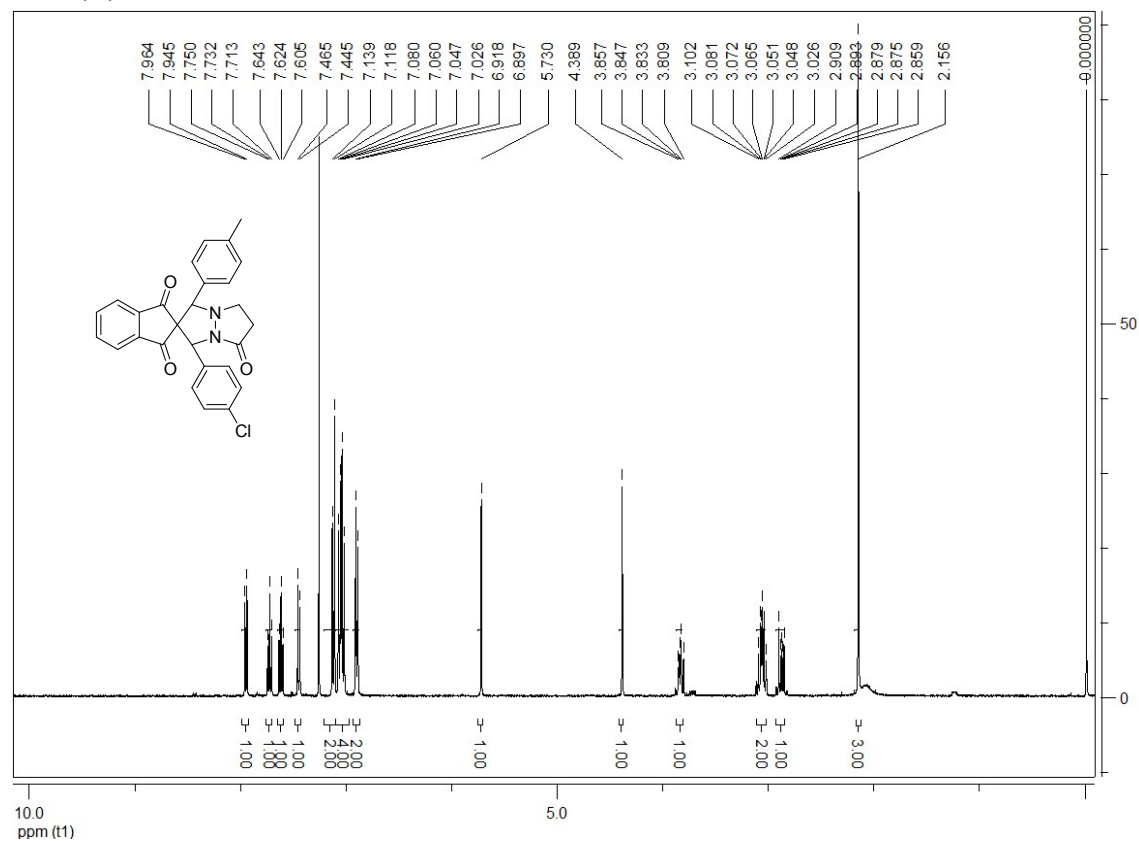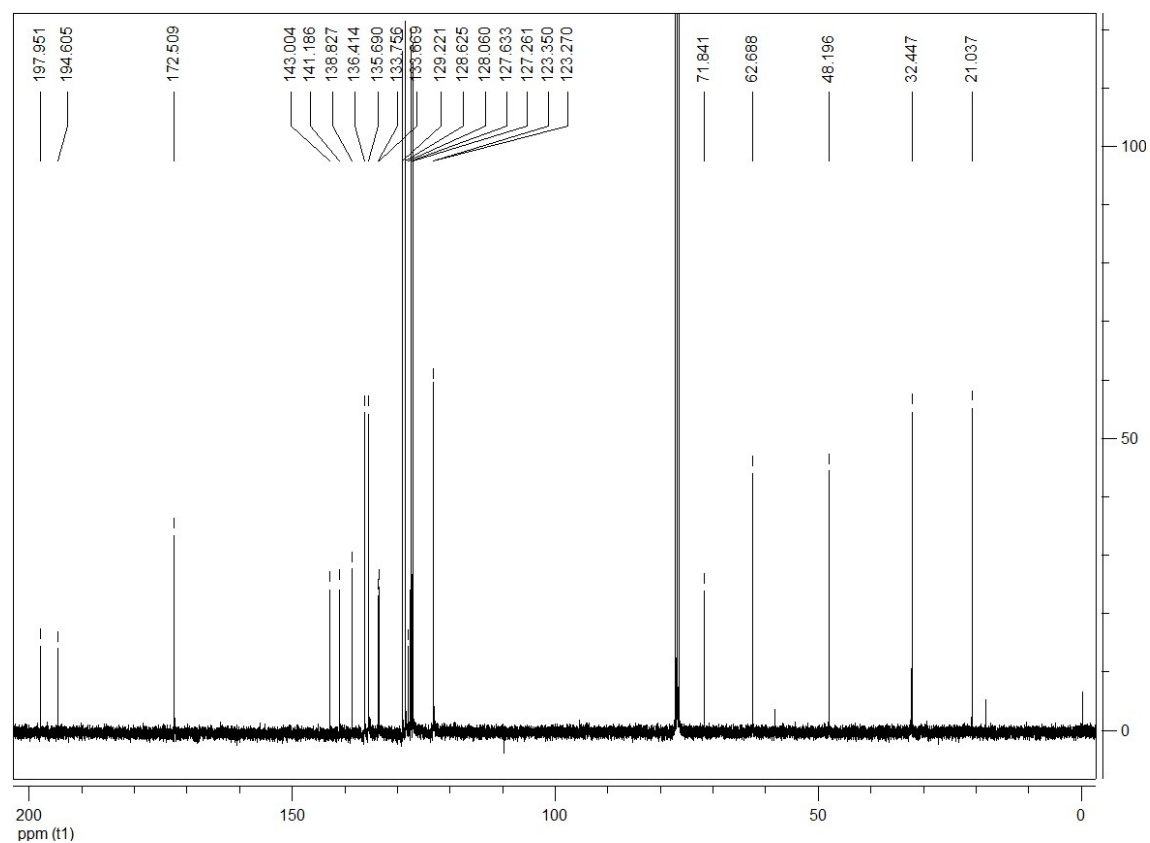

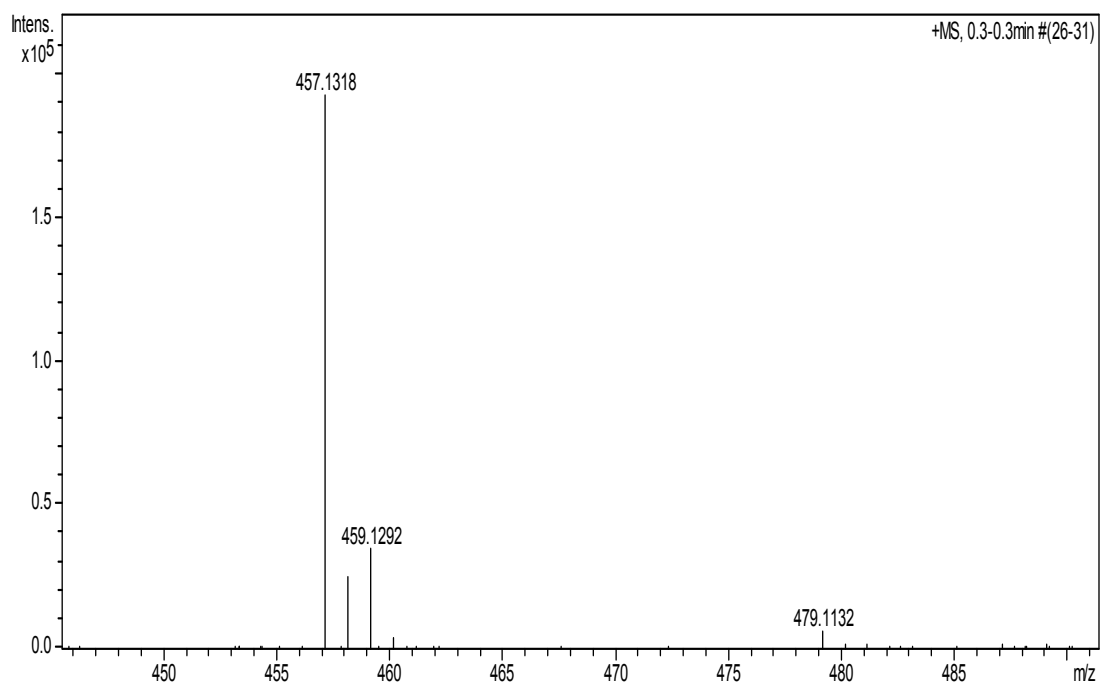

**3'-(4-Bromophenyl)-1'-(p-tolyl)-6',7'-dihydro-1'H-spiro[indene-2,2'-pyrazolo[1,2-a]pyrazole]-1,3,5'(3'H)-trione (1f):**

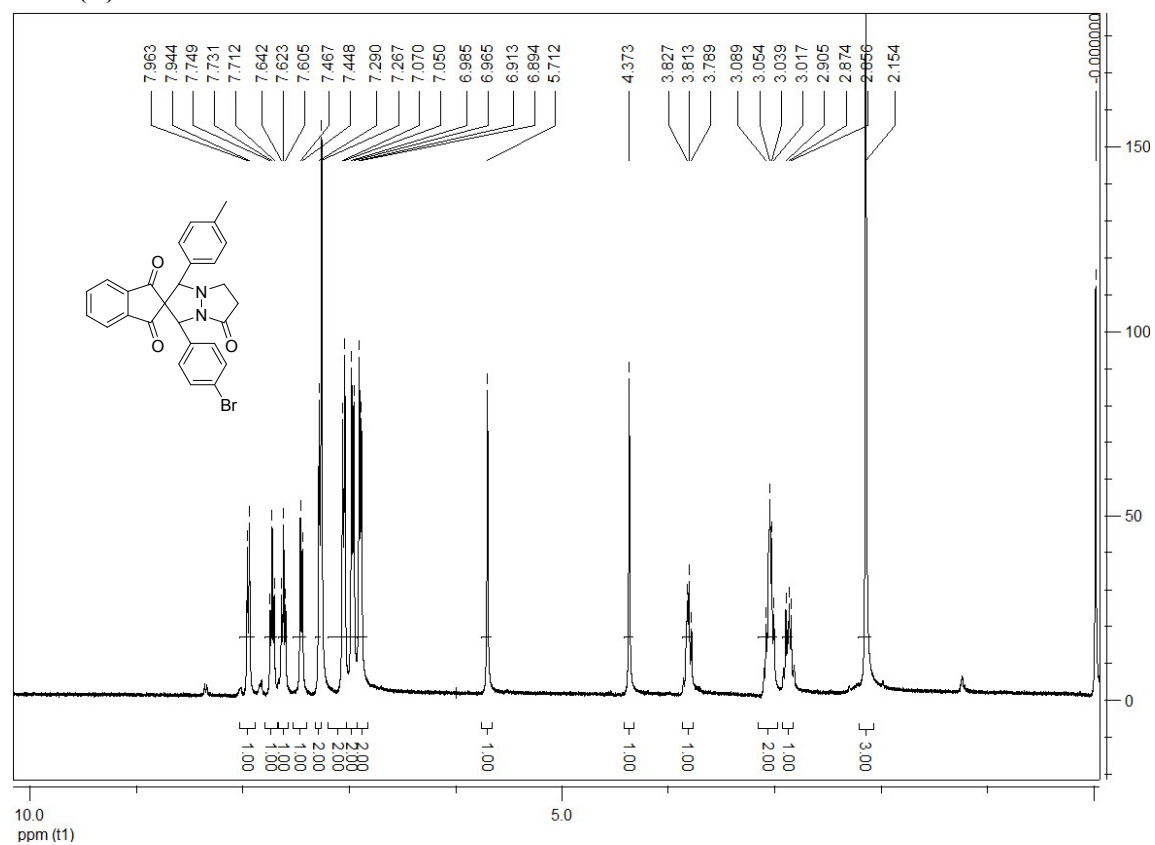

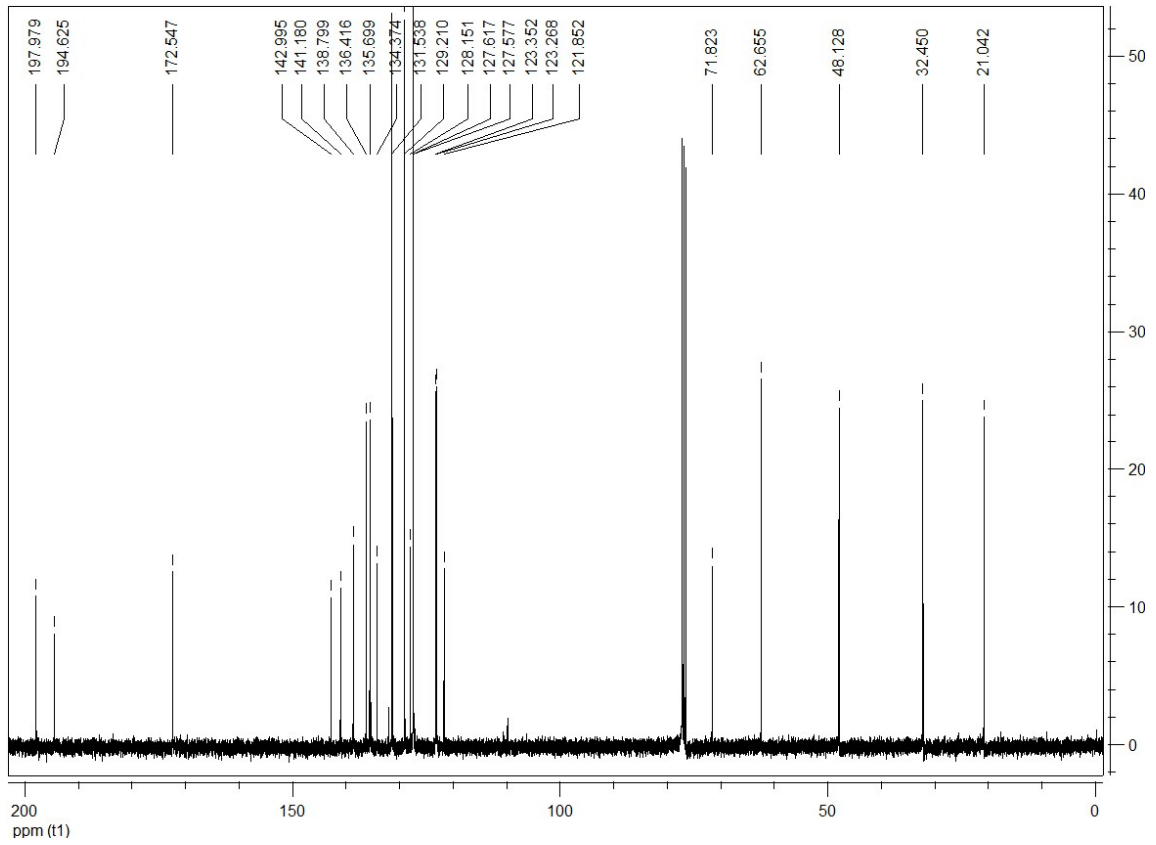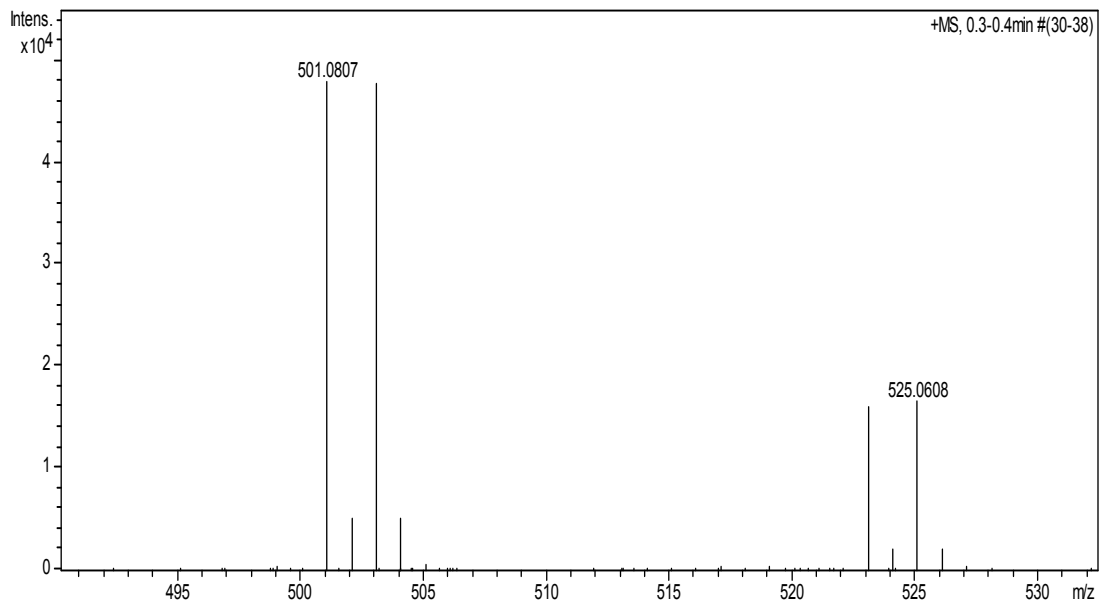

**3'-(3-nitrophenyl)-1'-(p-tolyl)-6',7'-dihydro-1'H-spiro[indene-2,2'-pyrazolo[1,2-a]pyrazole]-1,3,5'(3'H)-trione (1g):**

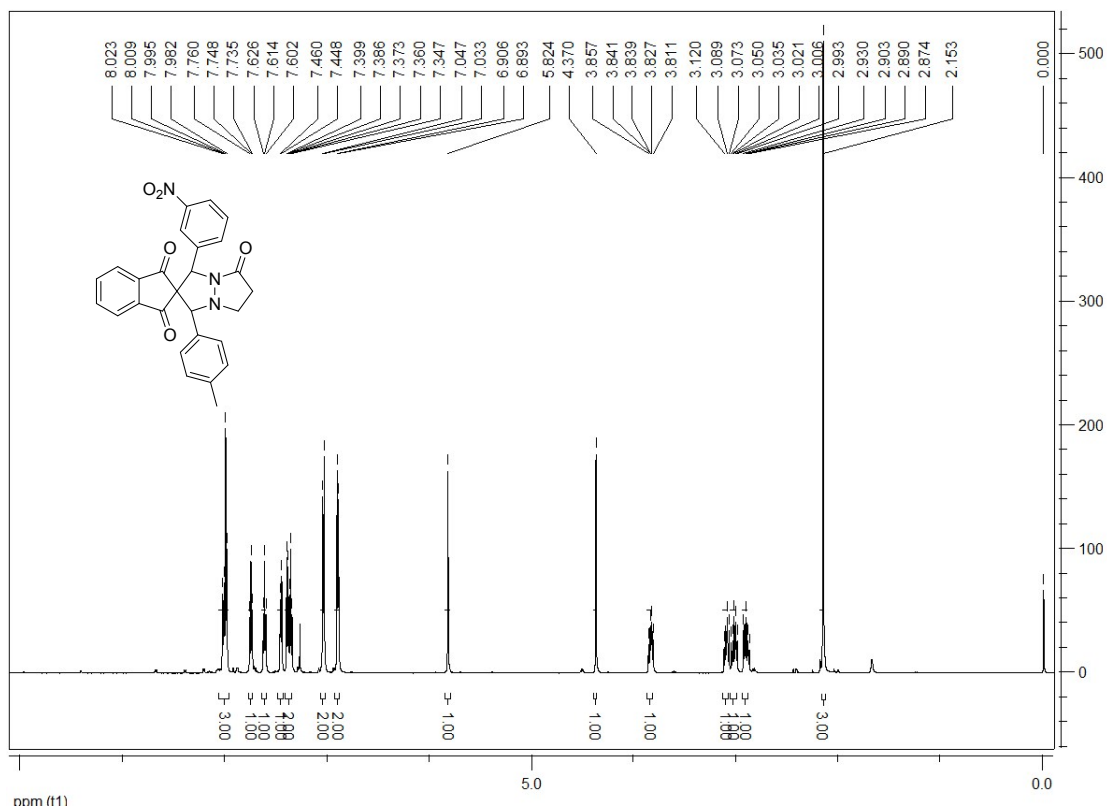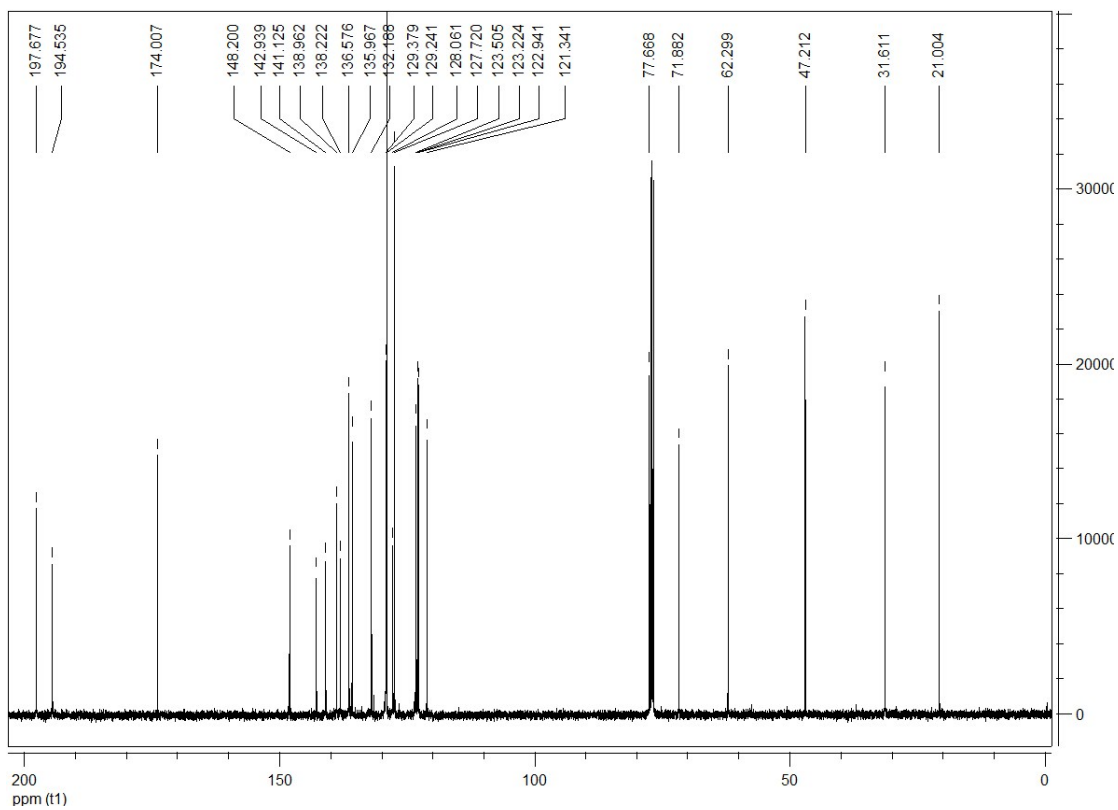

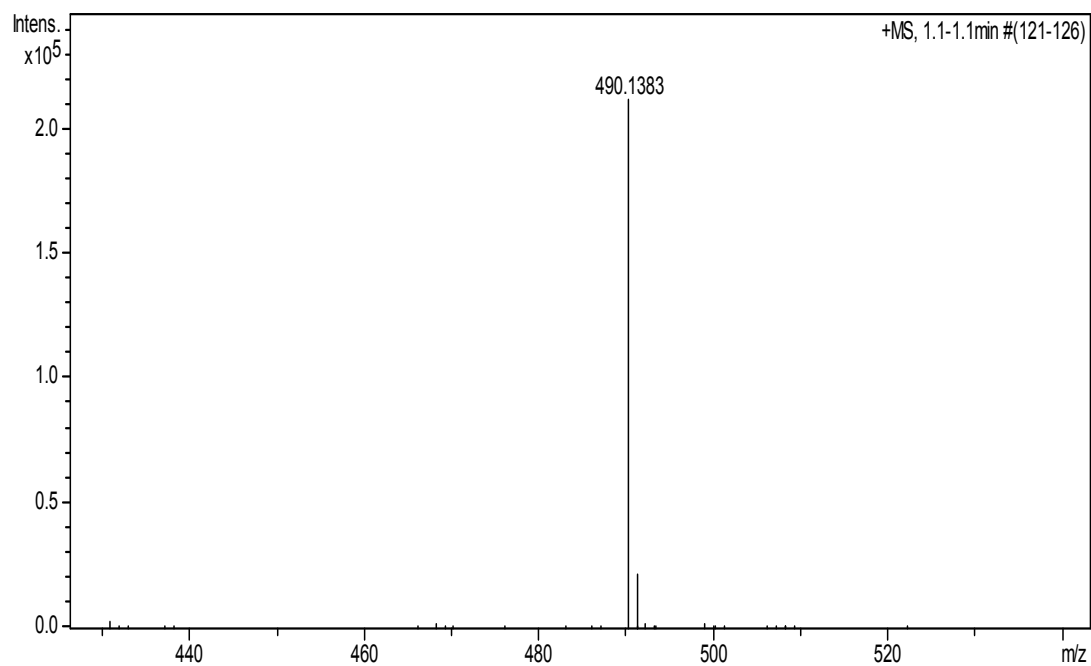

**3'-(4-chlorophenyl)-1'-(m-tolyl)-6',7'-dihydro-1'H-spiro[indene-2,2'-pyrazolo[1,2-a]pyrazole]-1,3,5'(3'H)-trione (1h):**

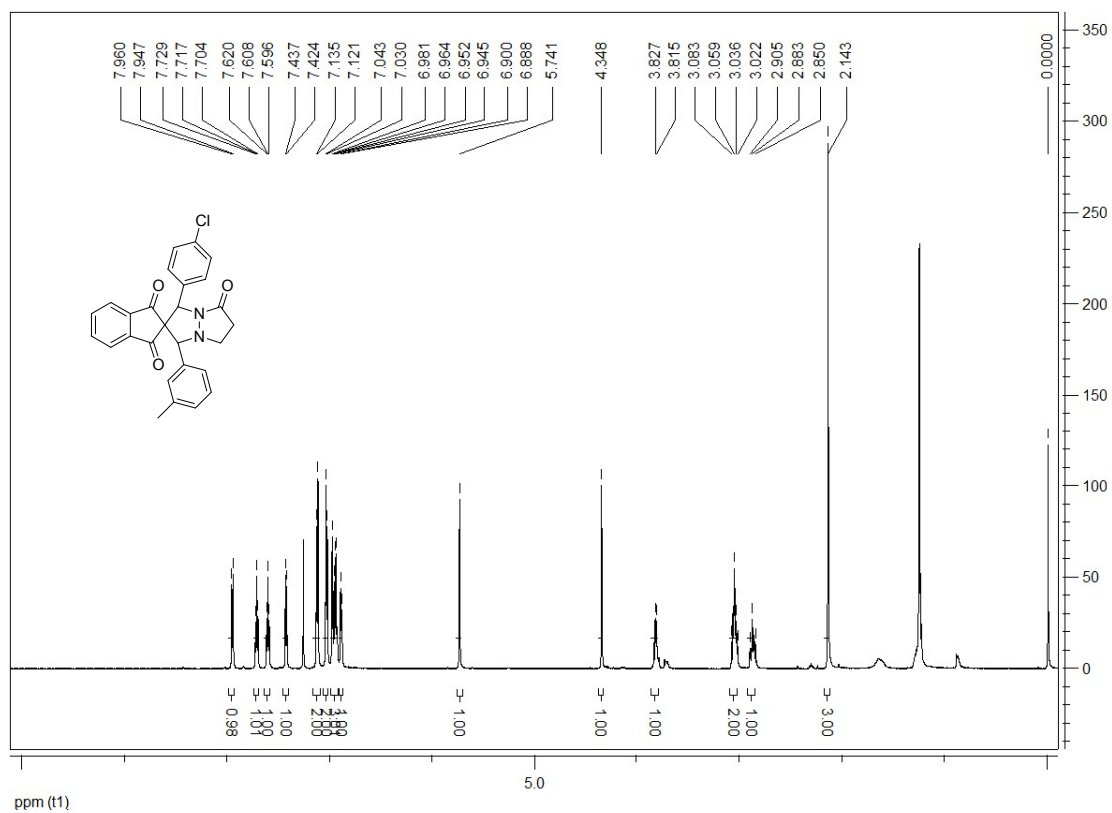

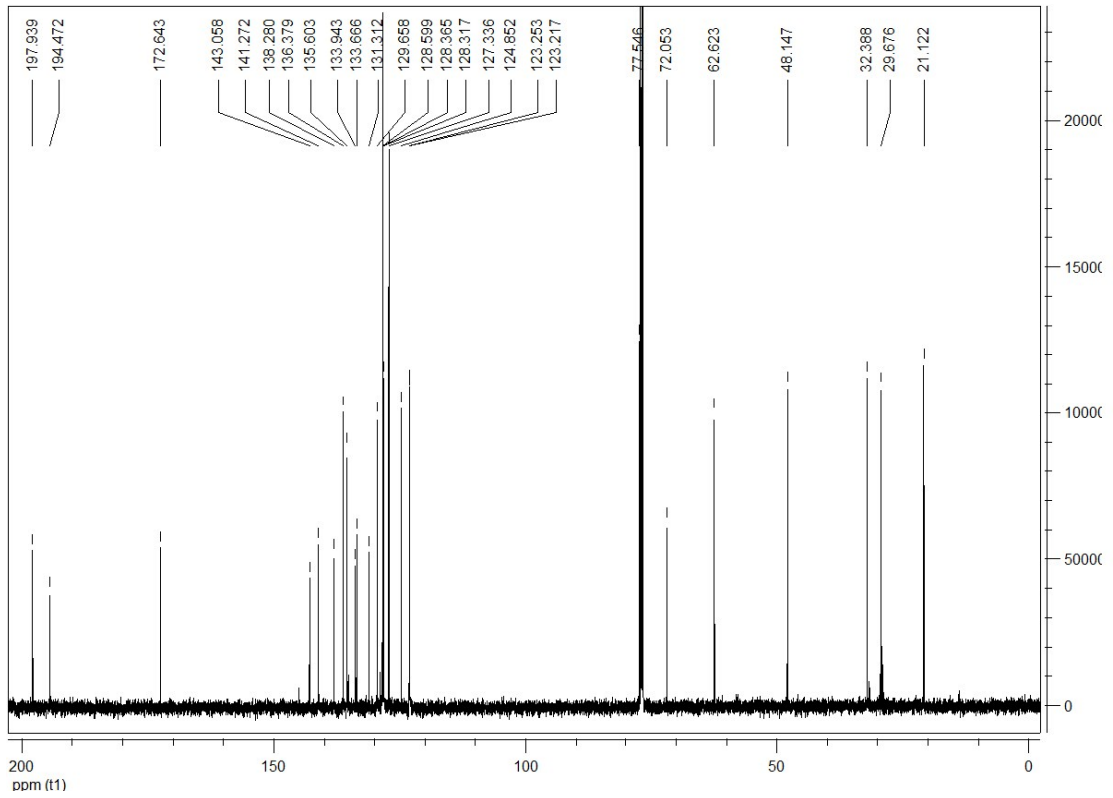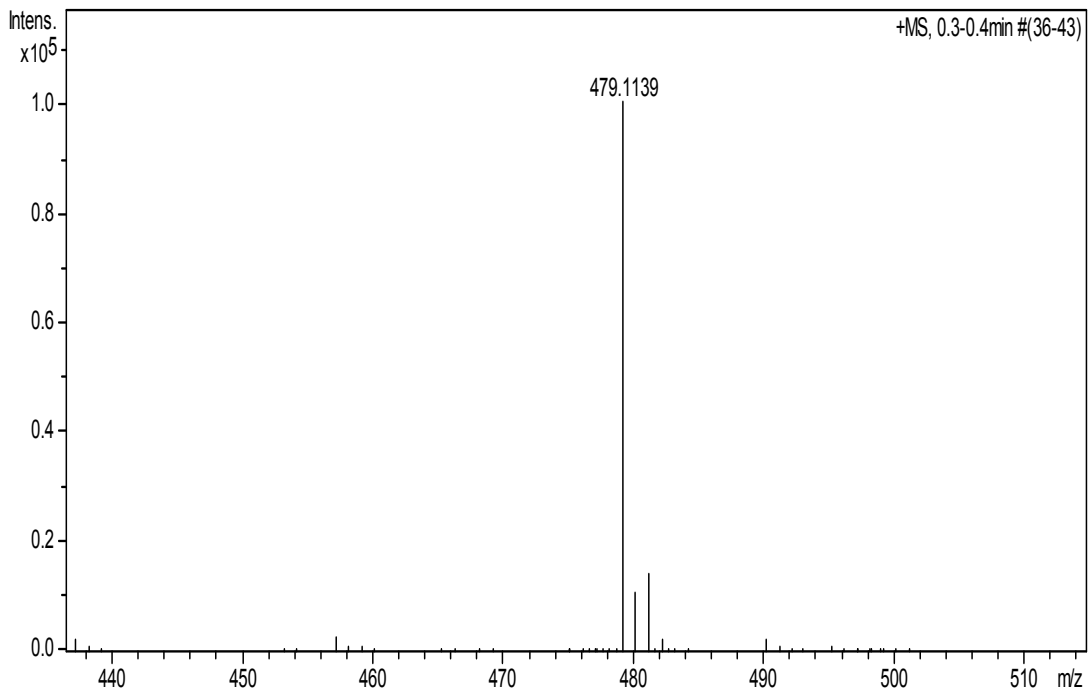

**3'-(3-Methoxyphenyl)-1'-(4-methoxyphenyl)-6',7'-dihydro-1'H-spiro[indene-2,2'-pyrazolo[1,2-a]pyrazole]-1,3,5'(3'H)-trione (1i):**

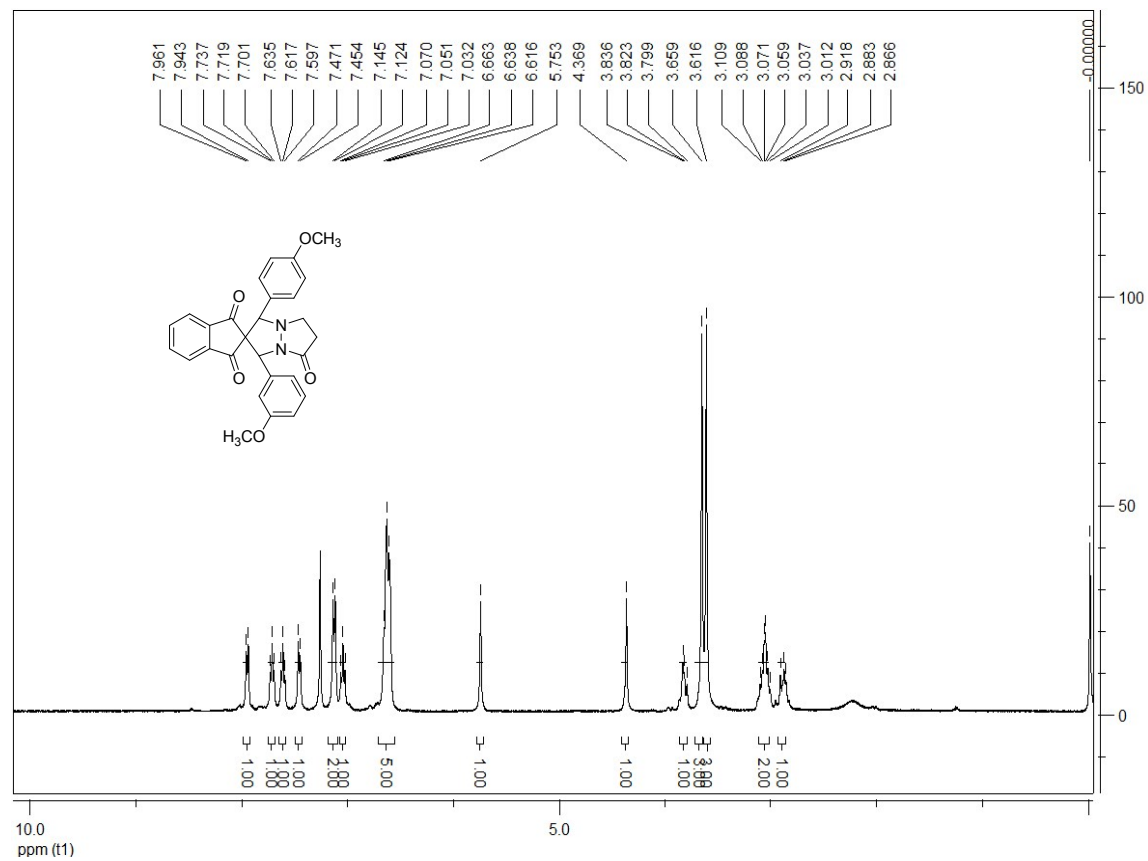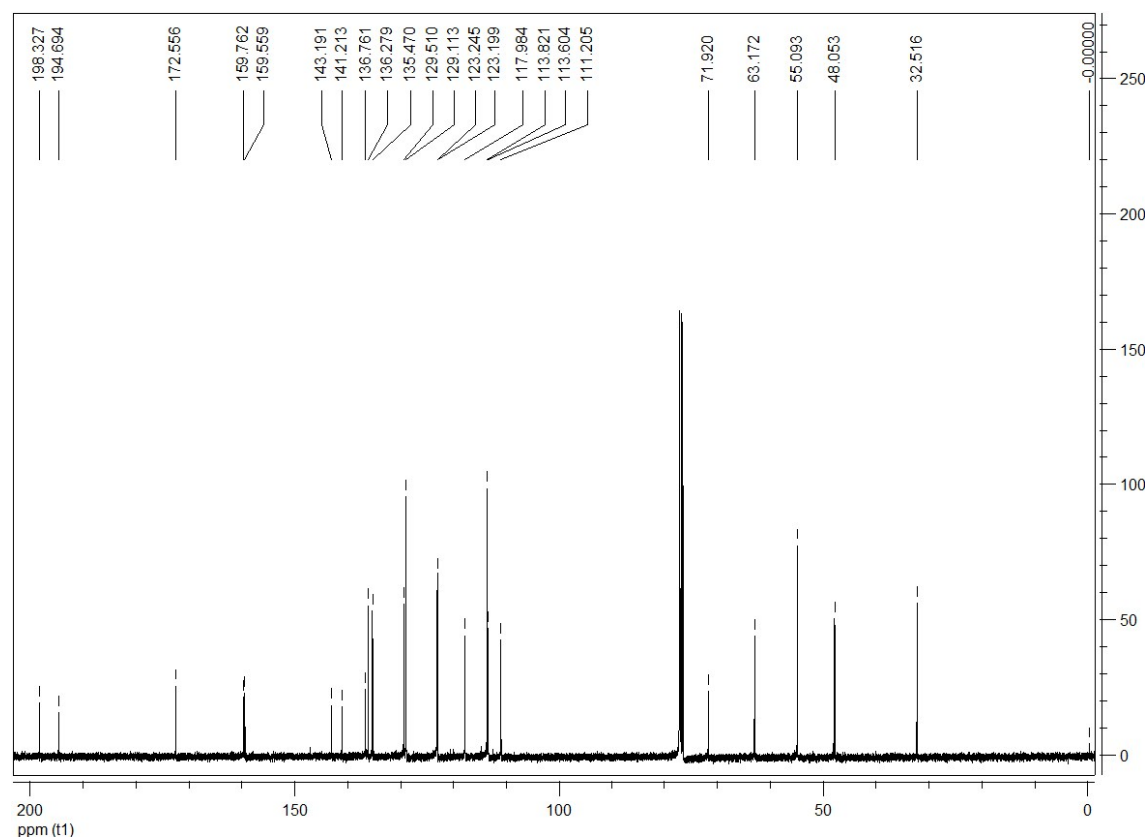



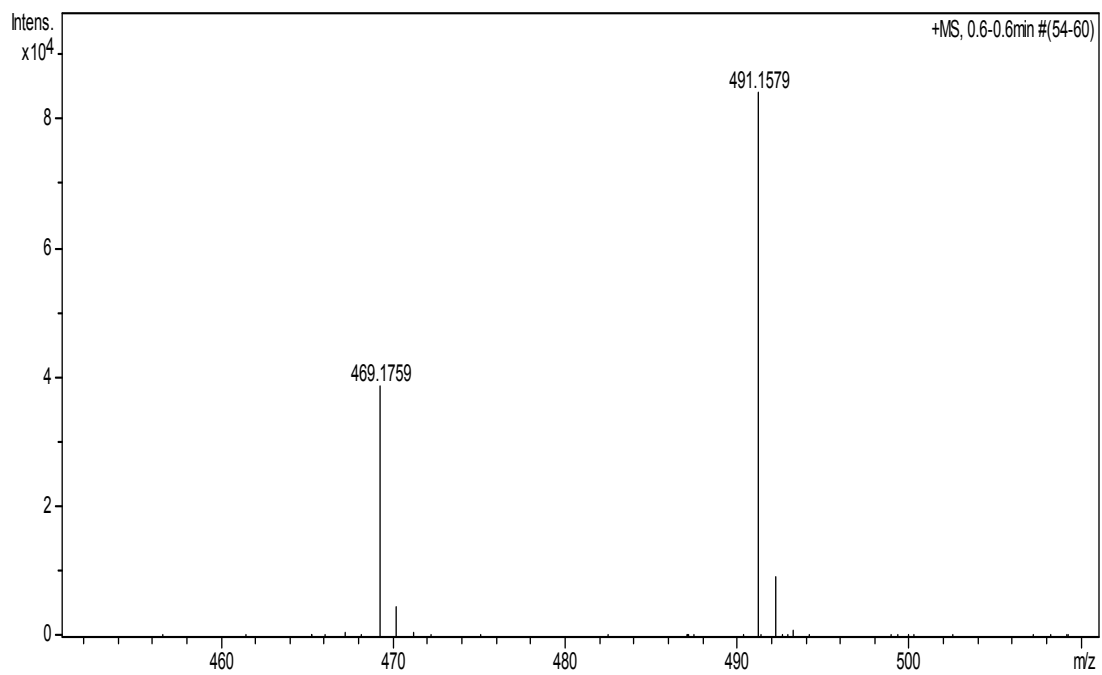

**3'-(4-Bromophenyl)-1'-(4-methoxyphenyl)-6',7'-dihydro-1'H-spiro[indene-2,2'-pyrazolo[1,2-a]pyrazole]-1,3,5'(3'H)-trione (1j):**

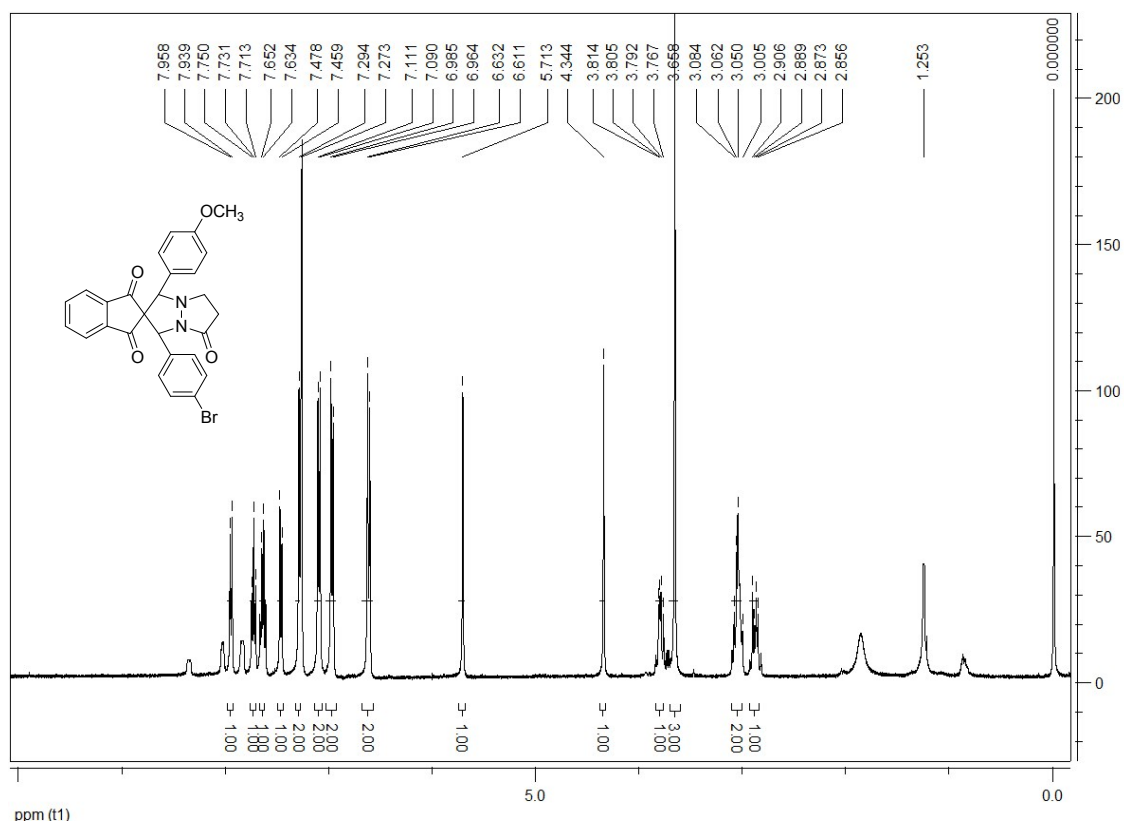

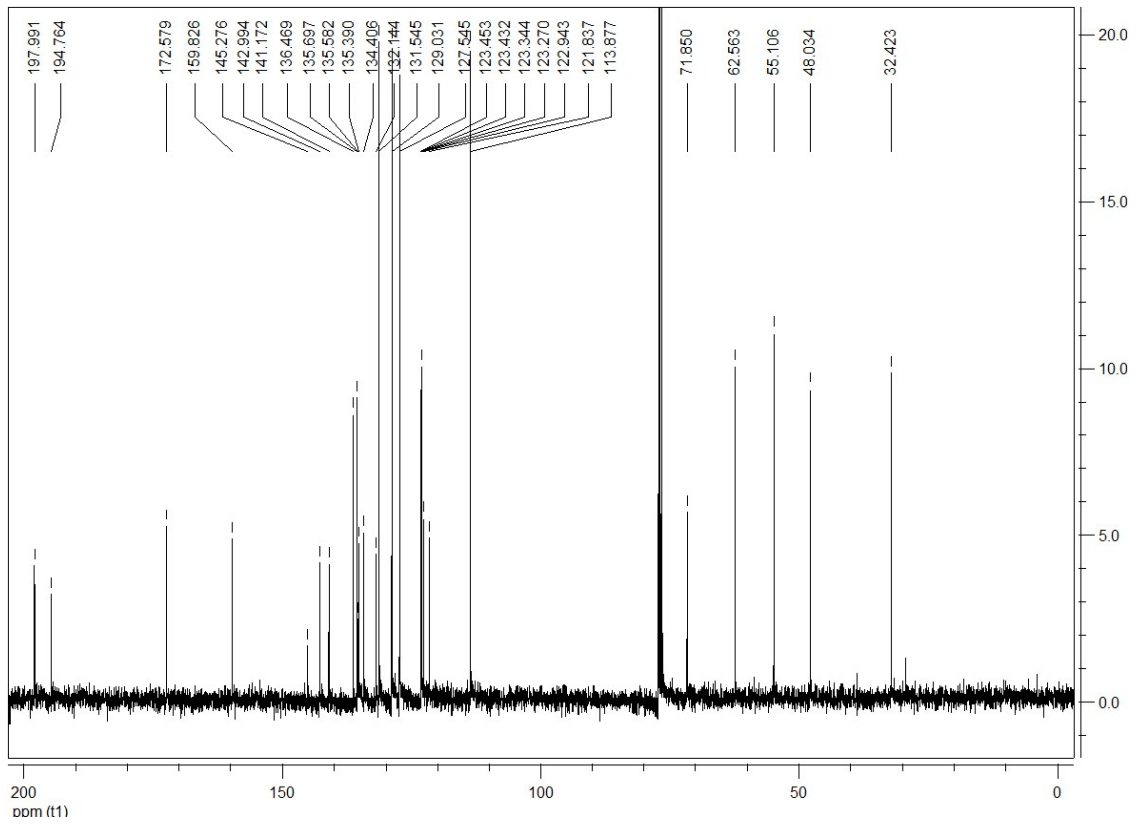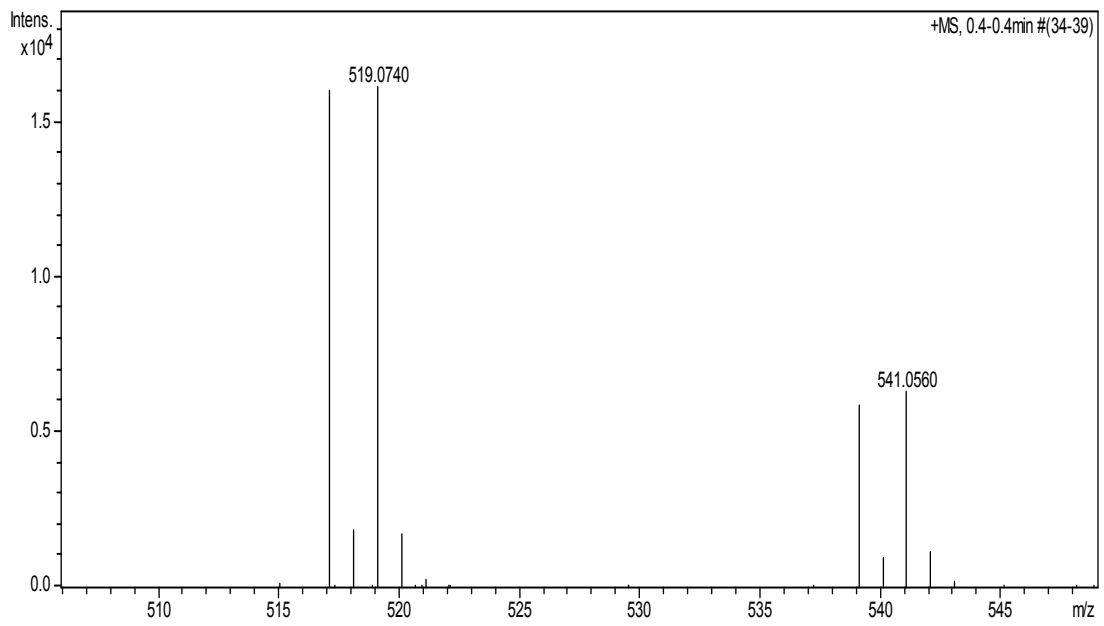

**[1'-(4-Chlorophenyl)-3'-(3-methoxyphenyl)-6',7'-dihydro-1'H-spiro[indene-2,2'-pyrazolo[1,2-a]pyrazole]-1,3,5'(3'H)-trione (1k):**

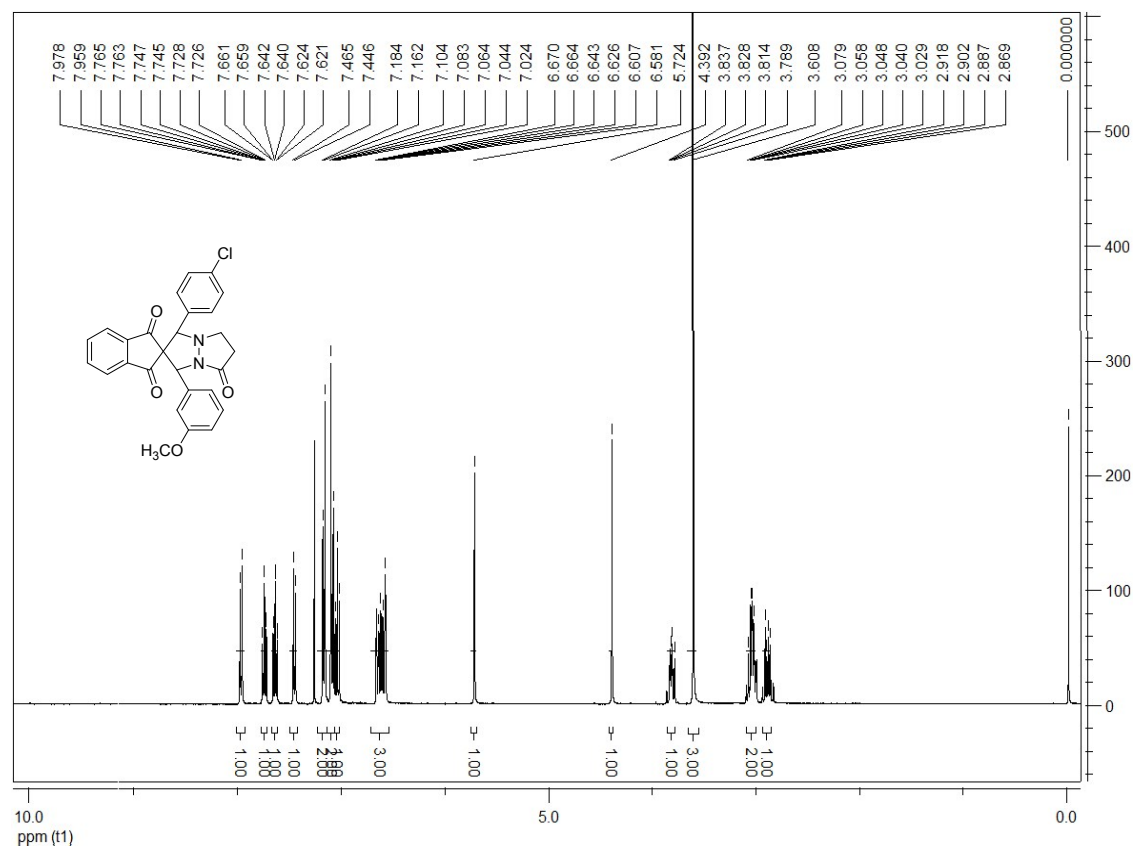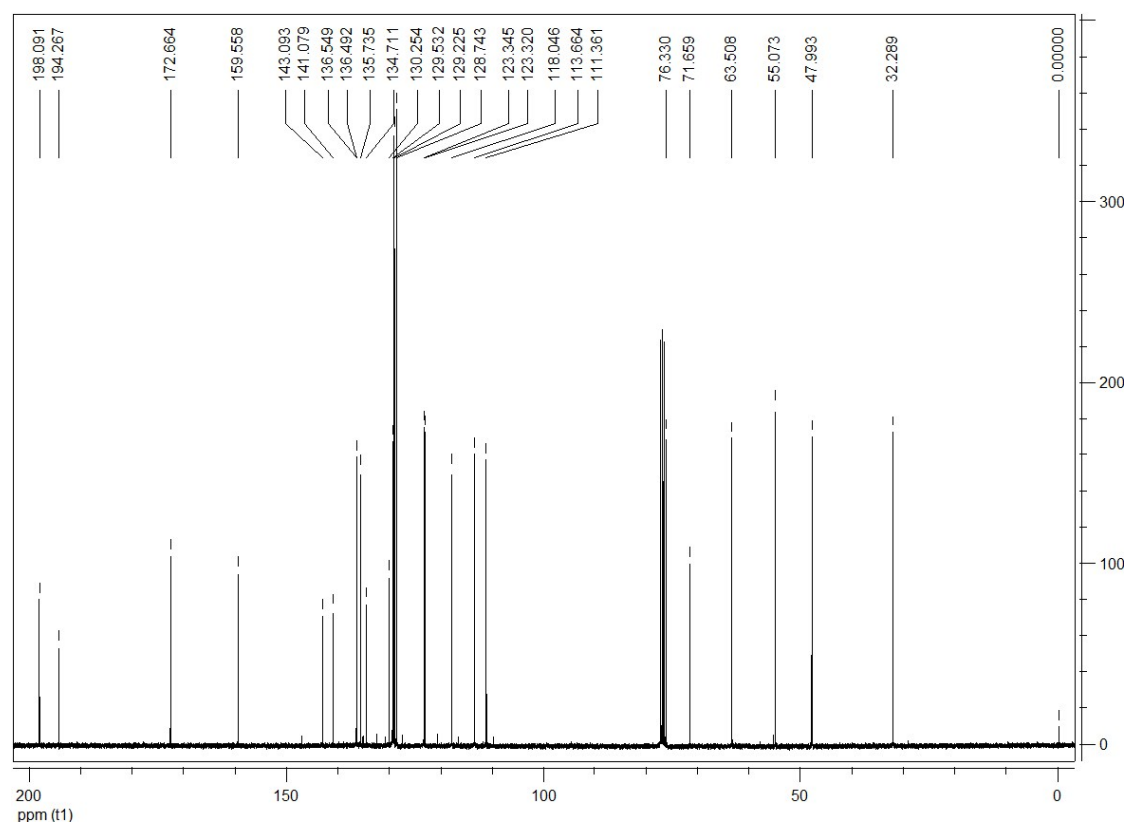

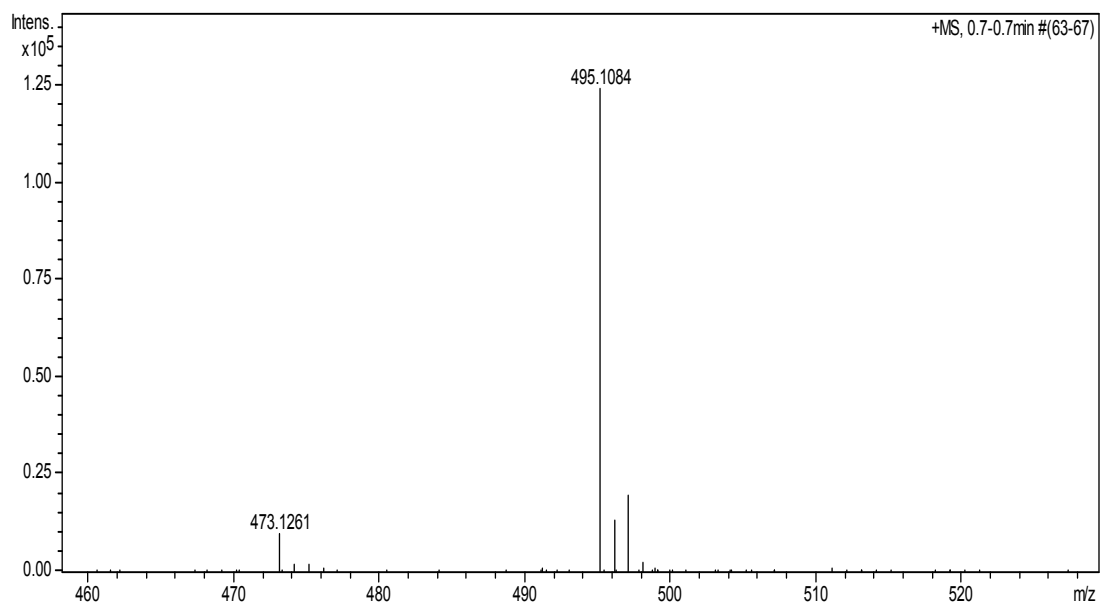

**1',3'-Bis(4-chlorophenyl)-6',7'-dihydro-1'H-spiro[indene-2,2'-pyrazolo[1,2-a]pyrazole]-1,3,5'(3'H)-trione (11):**

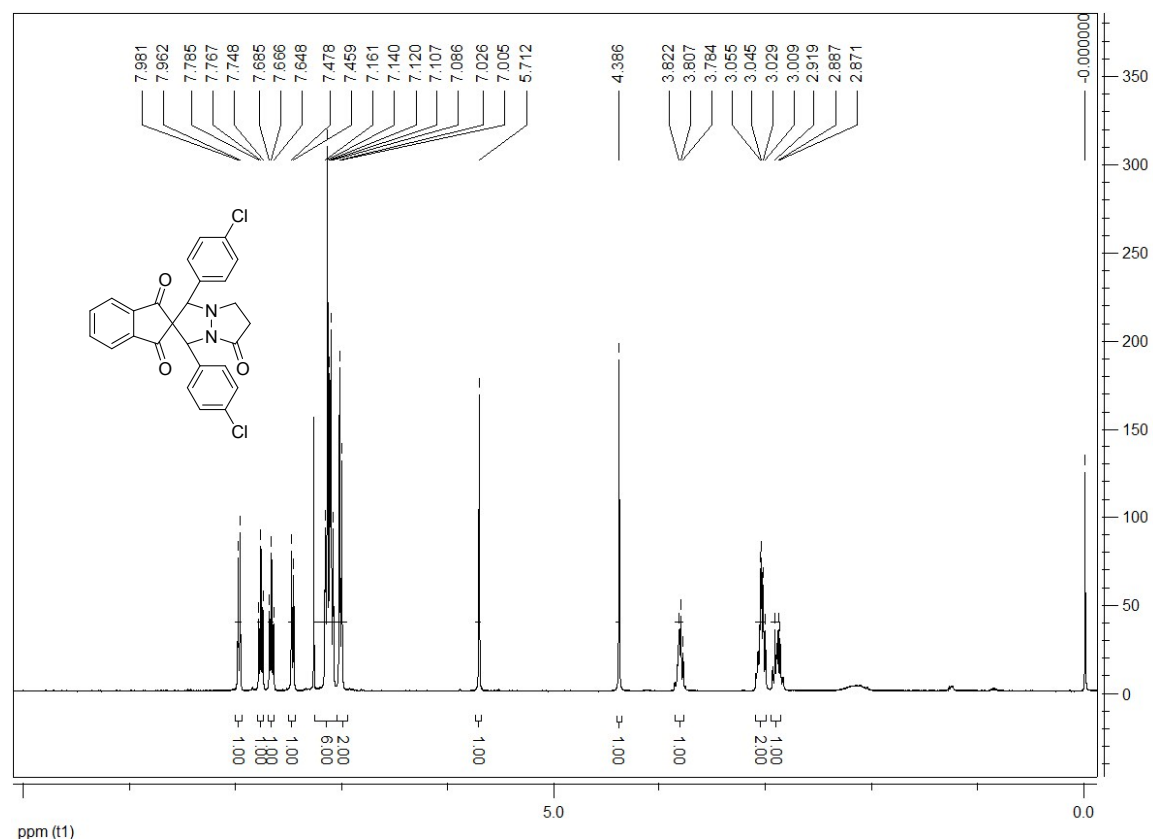

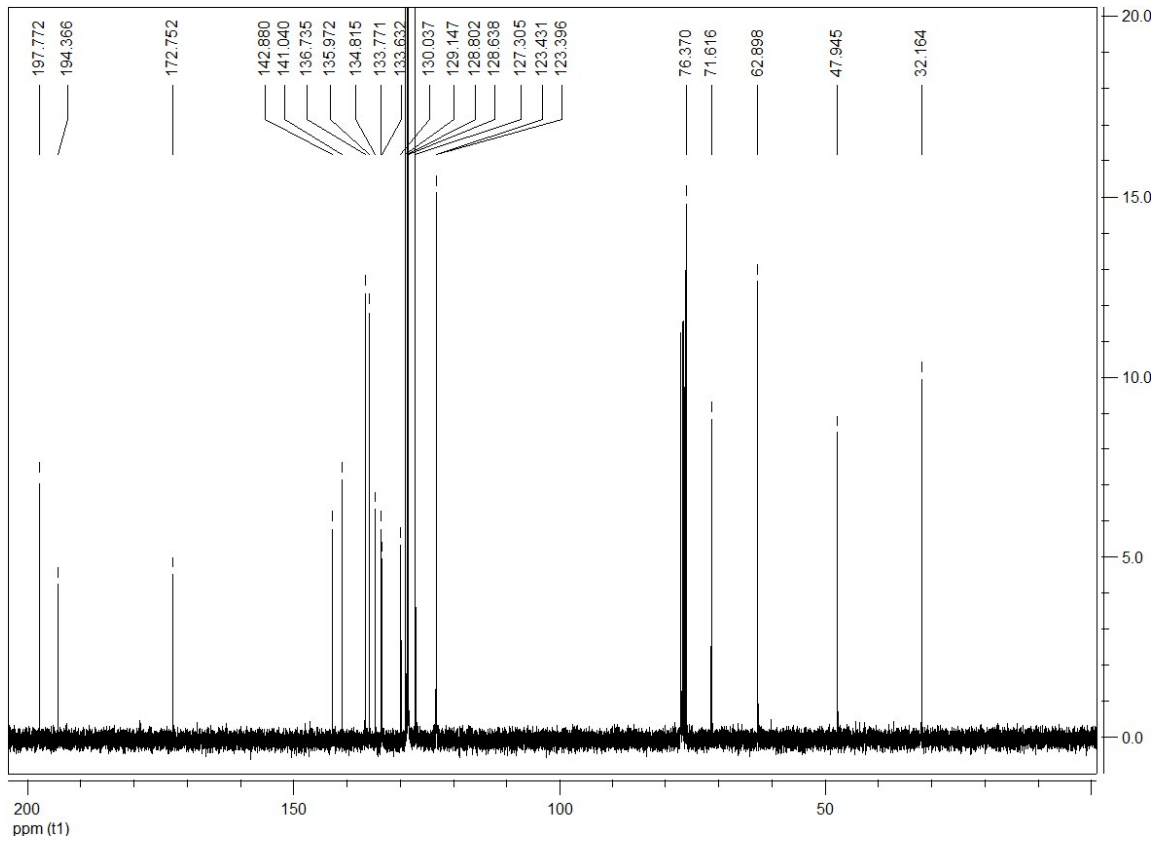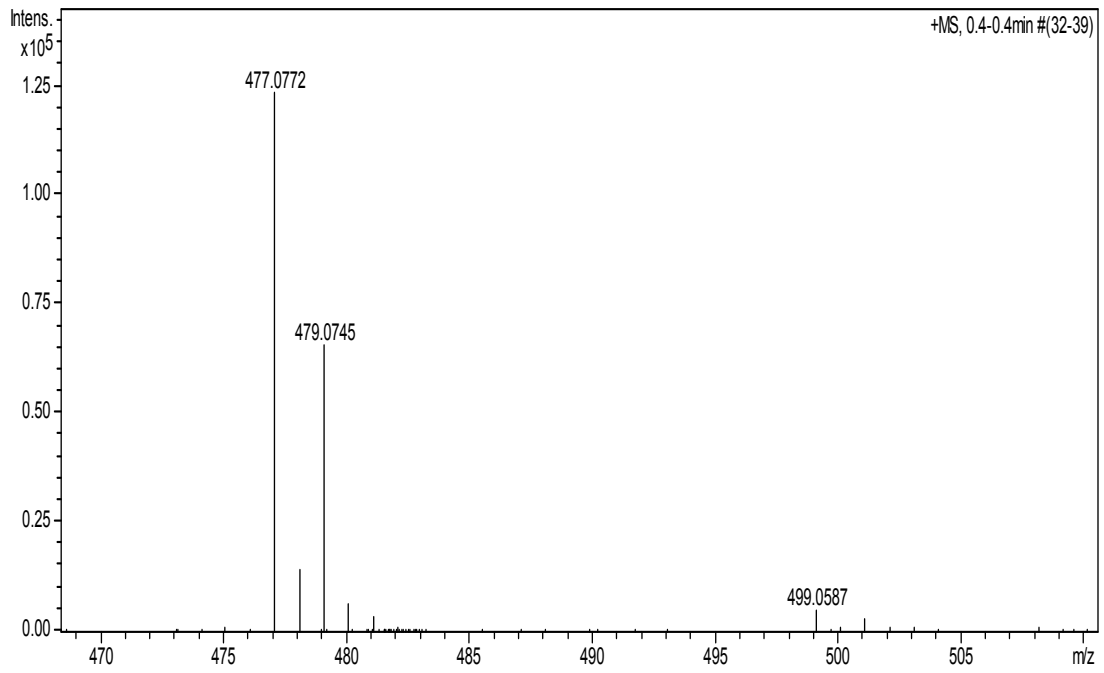

**3'-(4-Bromophenyl)-1'-(4-chlorophenyl)-6',7'-dihydro-1'H-spiro[indene-2,2'-pyrazolo[1,2-a]pyrazole]-1,3,5'(3'H)-trione (1m):**

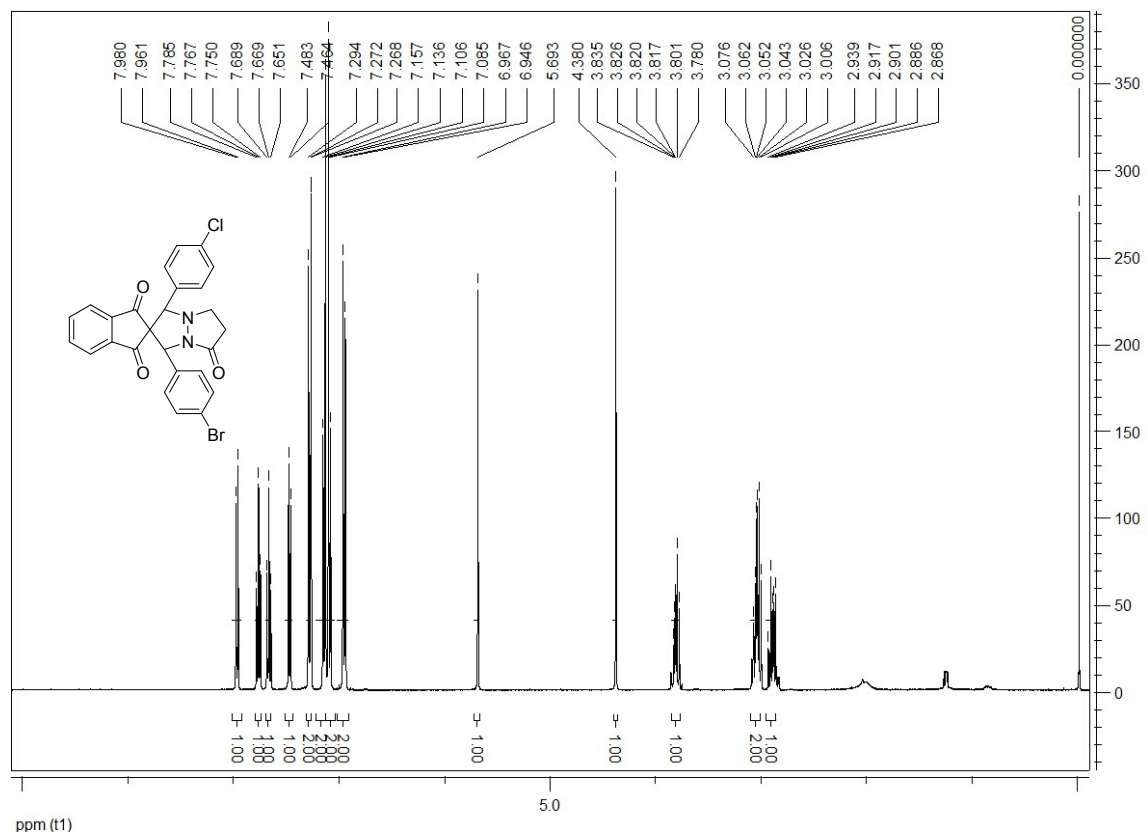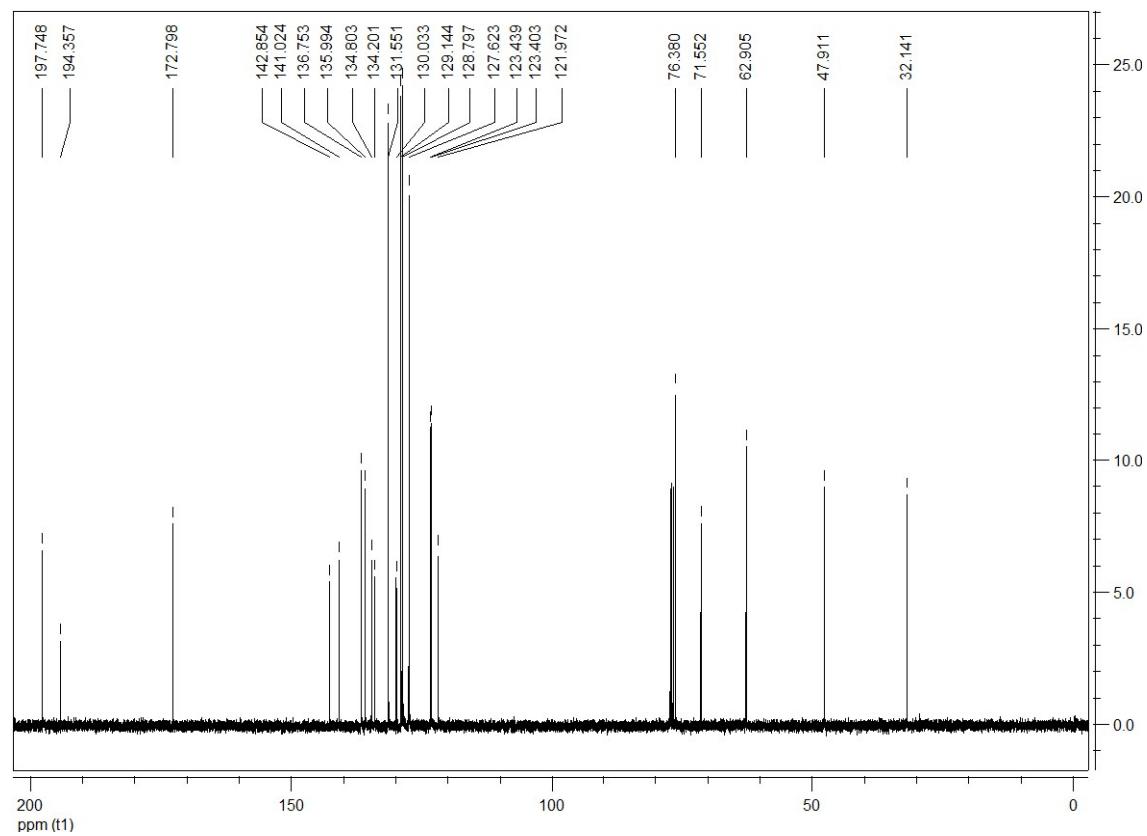

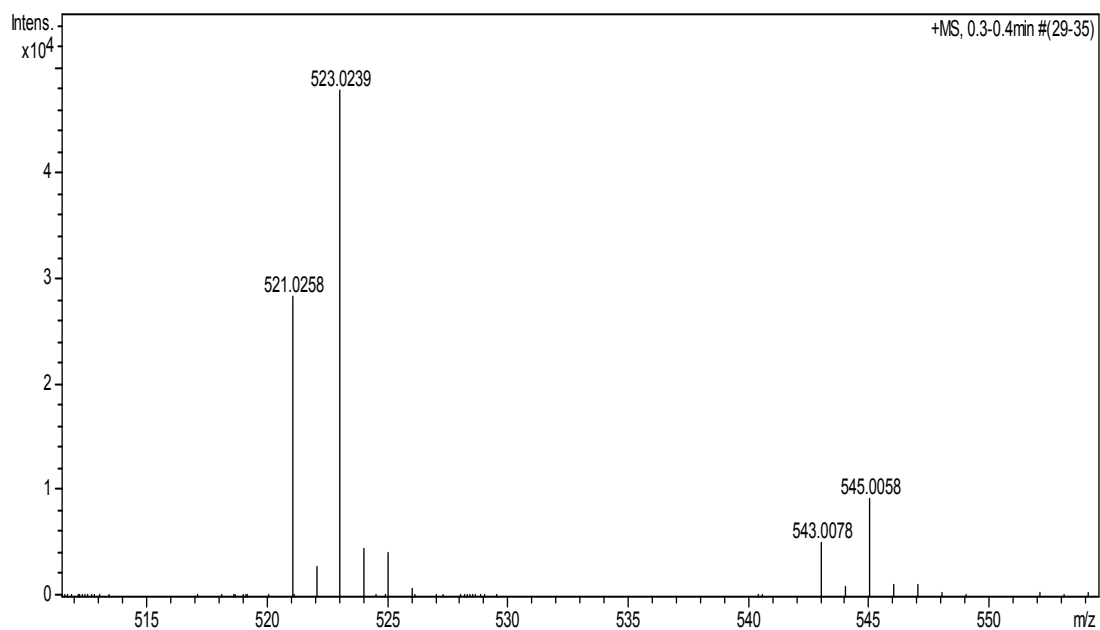

**1'-(4-bromophenyl)-3'-(3-methoxyphenyl)-6',7'-dihydro-1'H-spiro[indene-2,2'-pyrazolo[1,2-a]pyrazole]-1,3,5'(3'H)-trione (1n):**

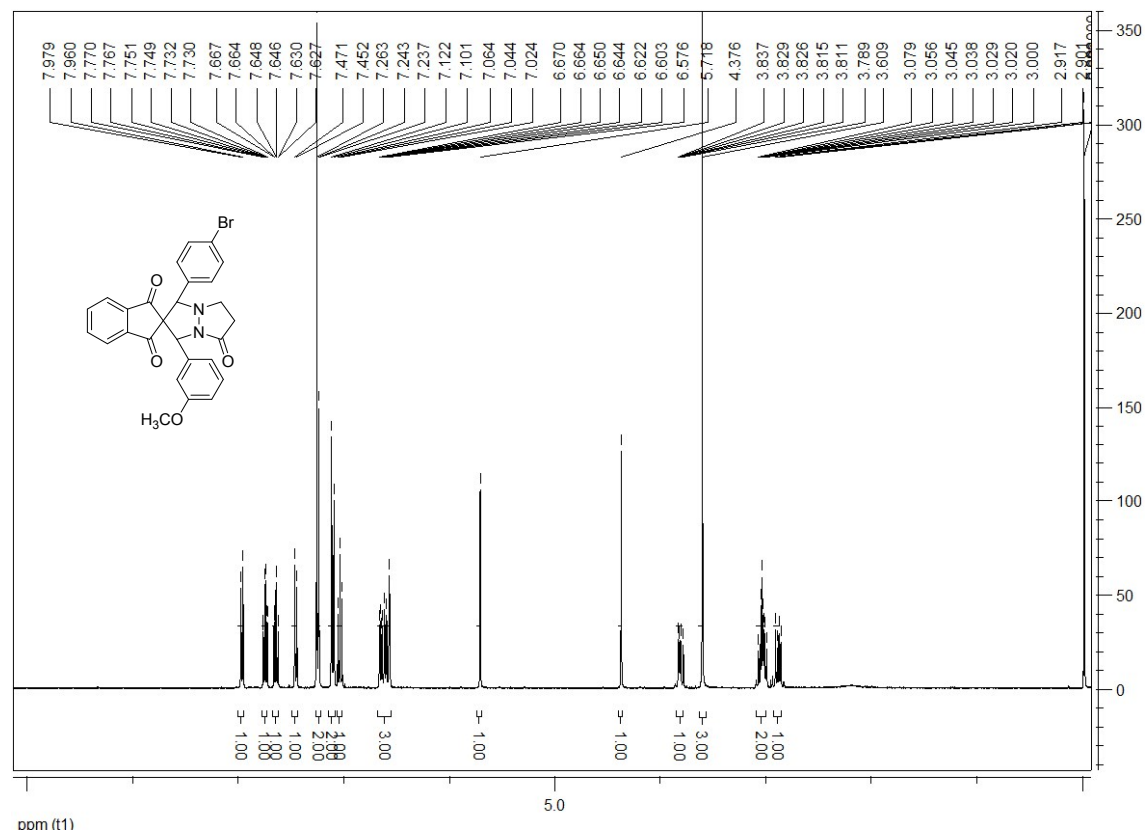

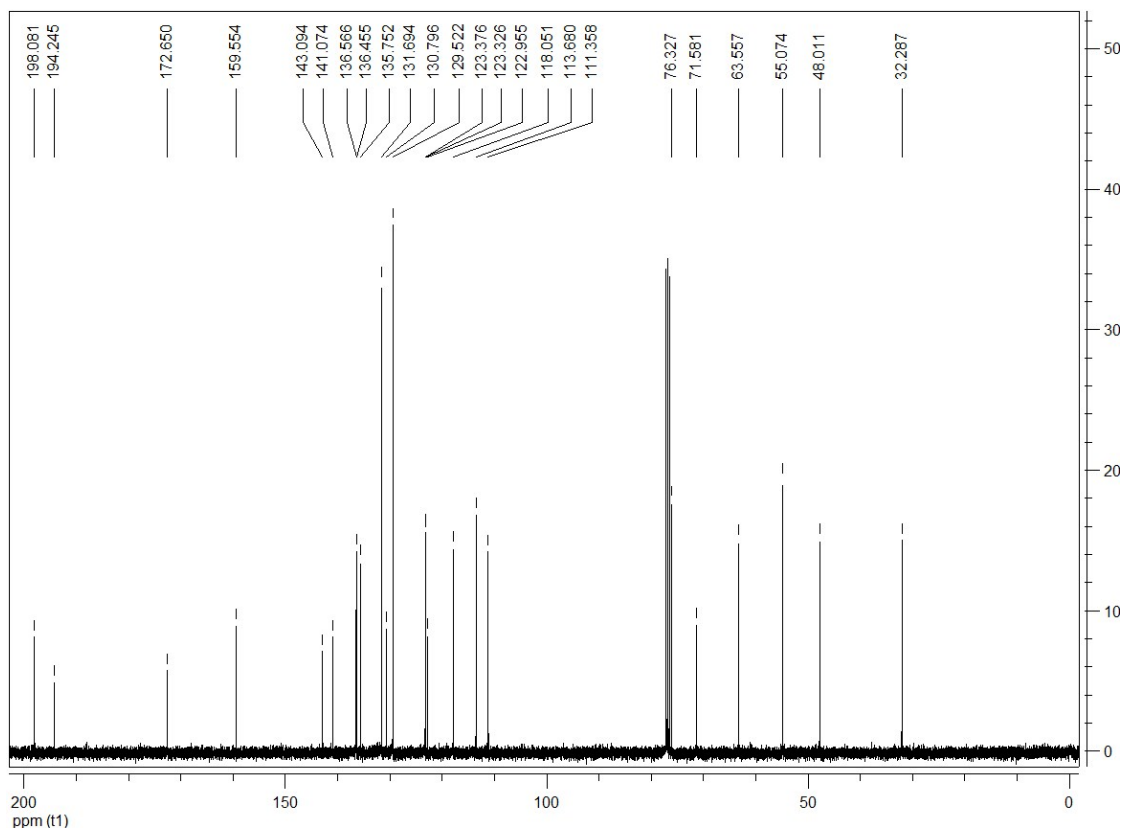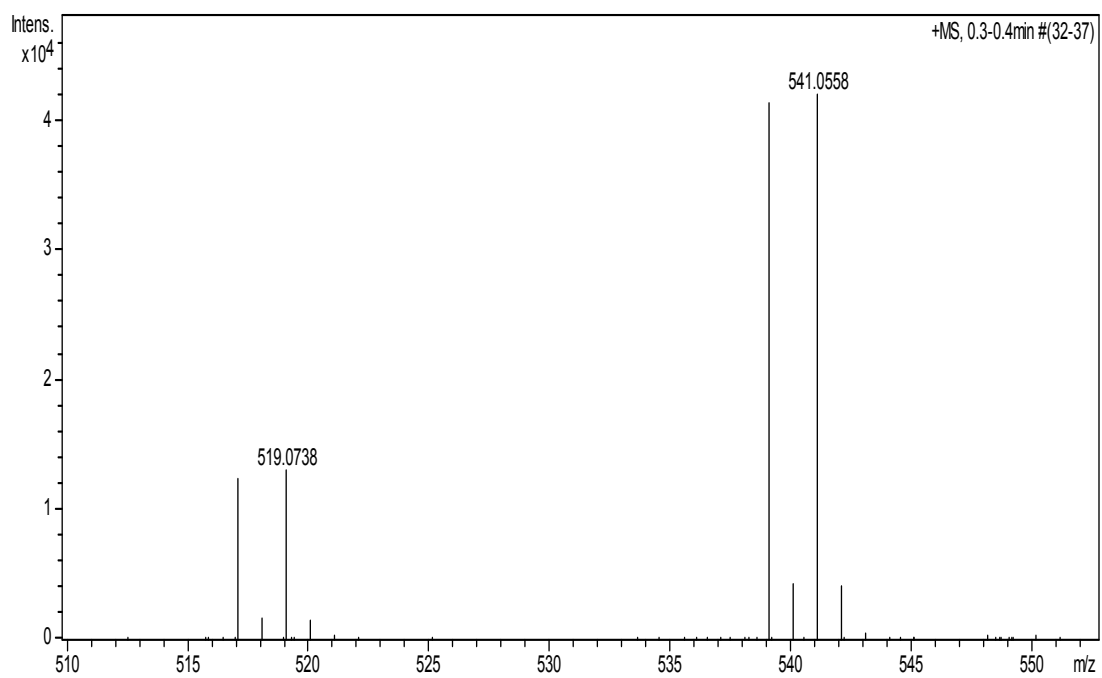



**1',3'-bis(4-bromophenyl)-6',7'-dihydro-1'H-spiro[indene-2,2'-pyrazolo[1,2-a]pyrazole]-1,3,5'(3'H)-trione**  
**(1o):**

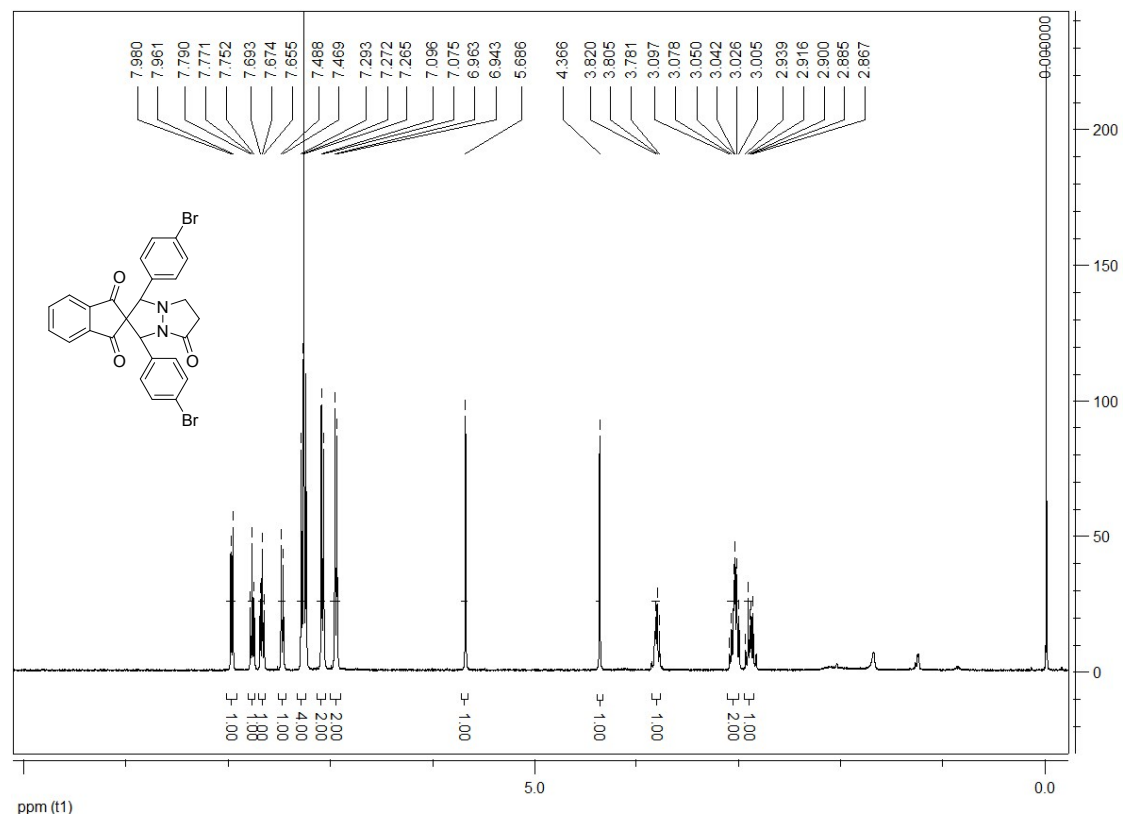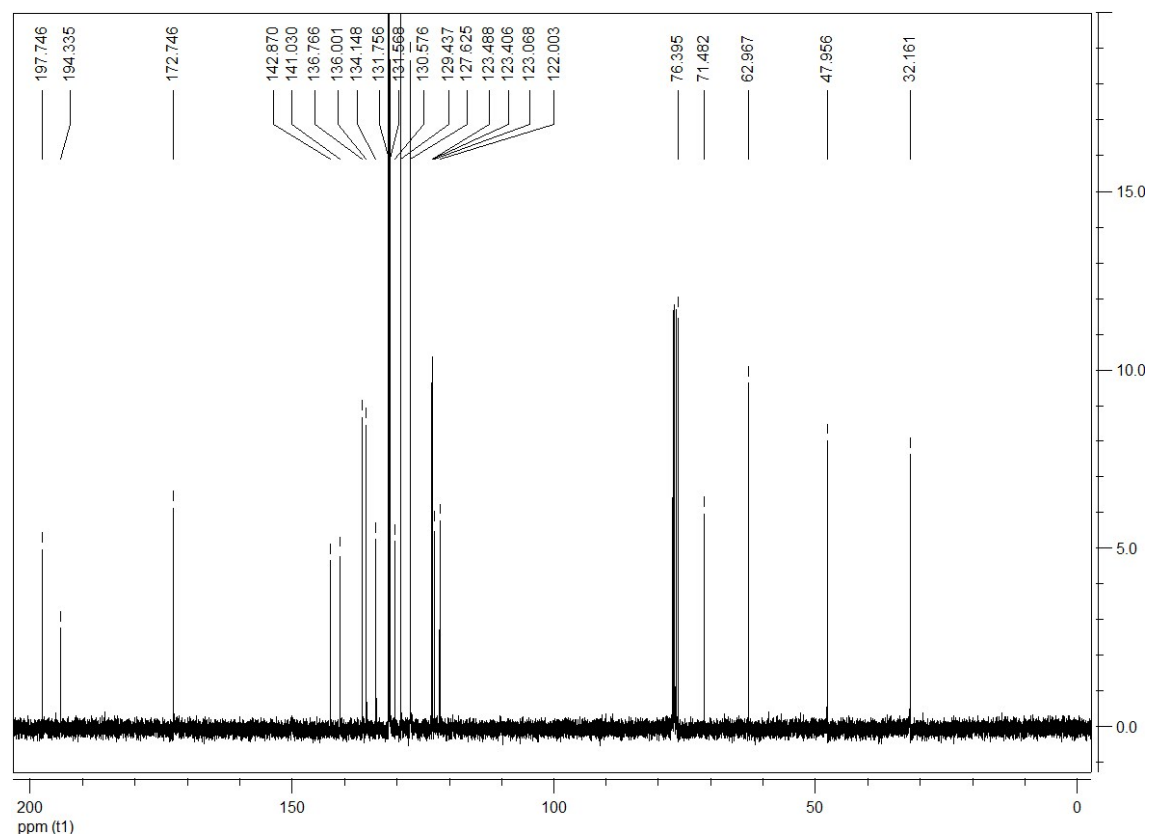

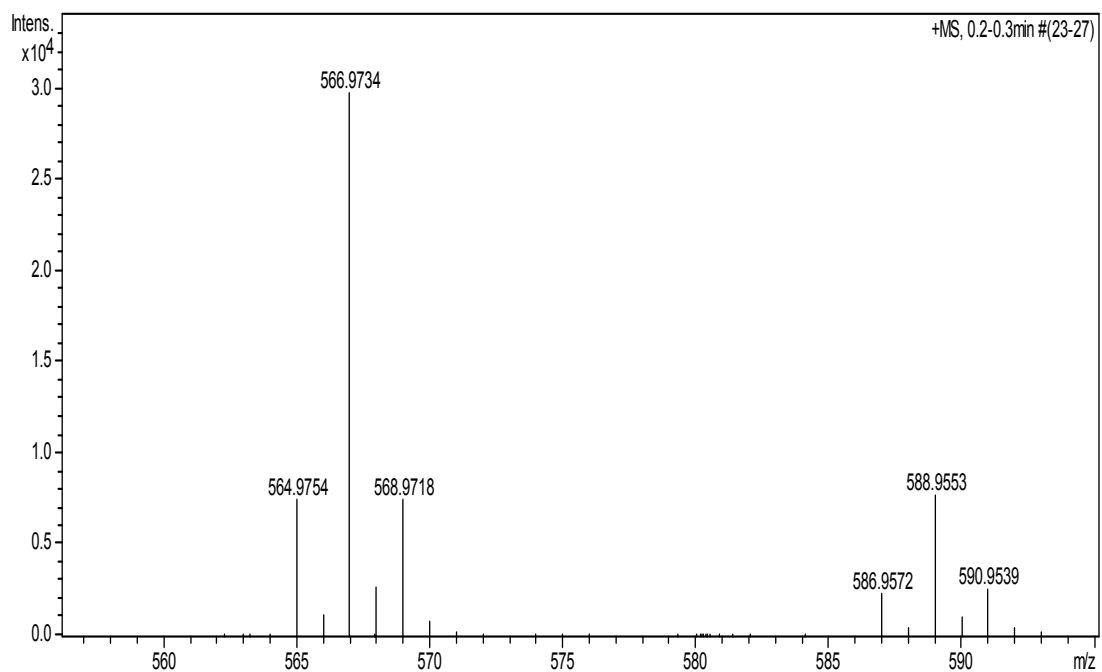

**3'-(4-chlorophenyl)-1'-(3-nitrophenyl)-6',7'-dihydro-1'H-spiro[indene-2,2'-pyrazolo[1,2-a]pyrazole]-1,3,5'(3'H)-trione (1p):**

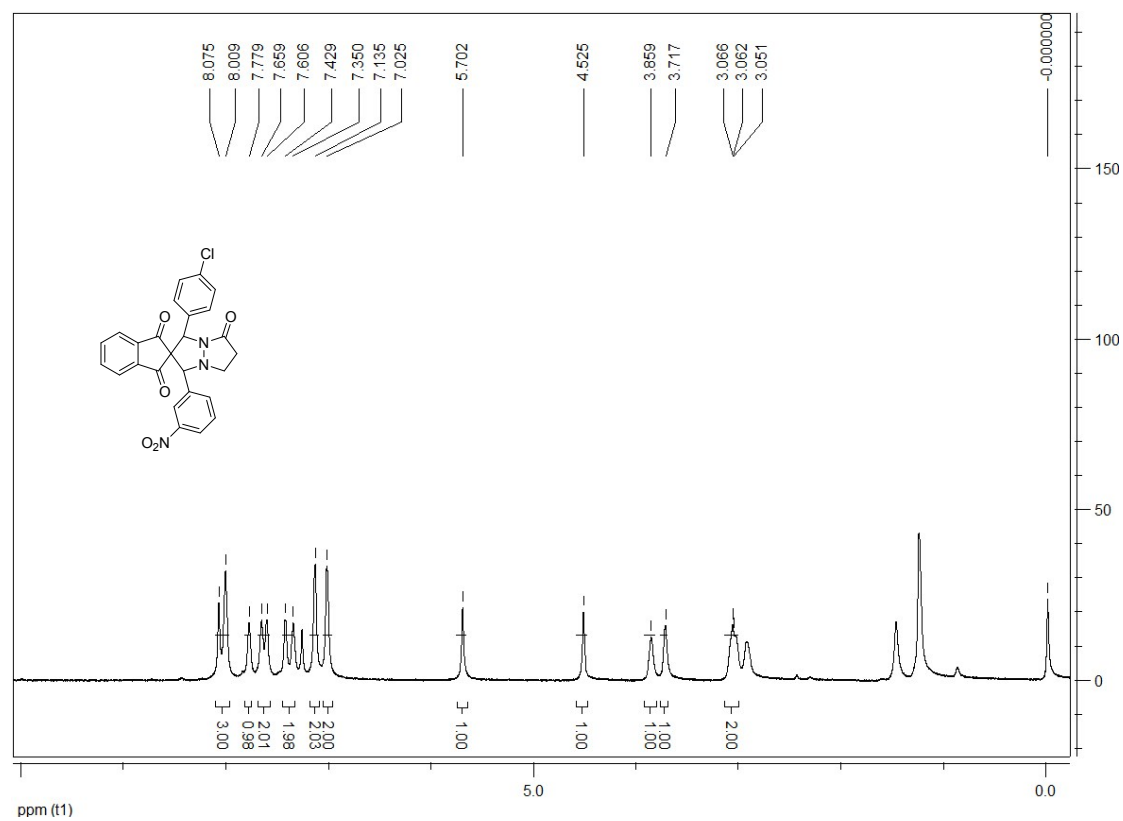

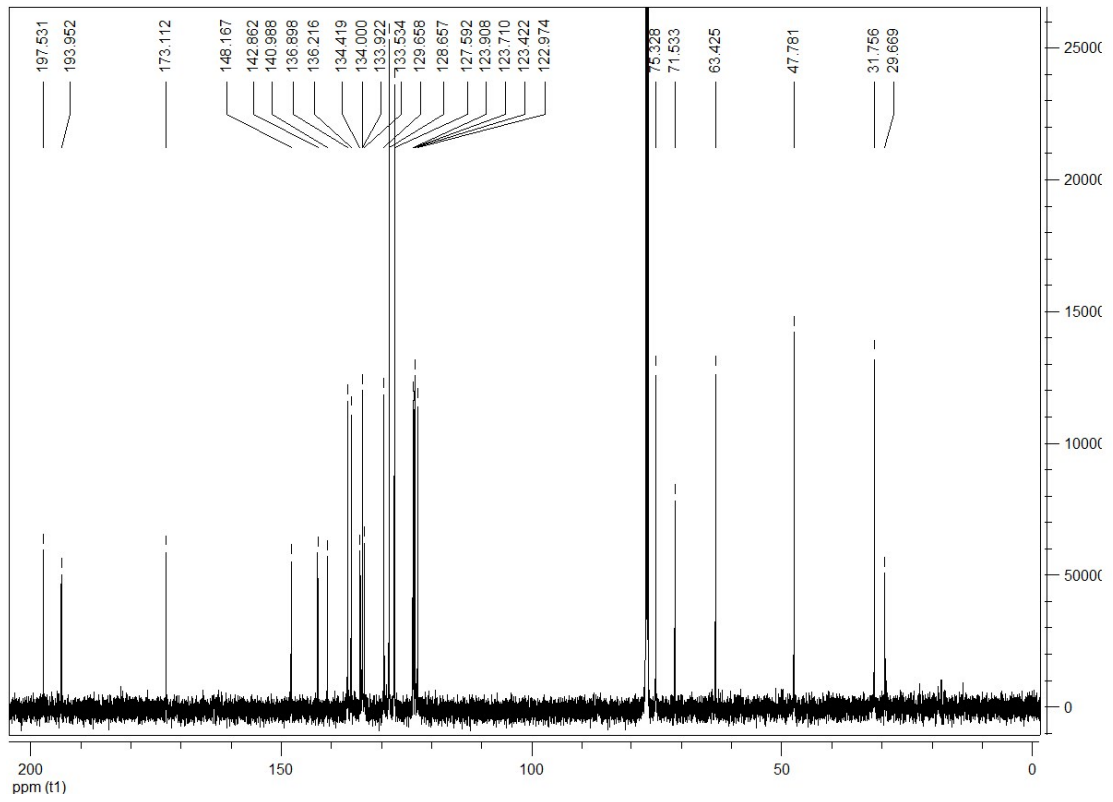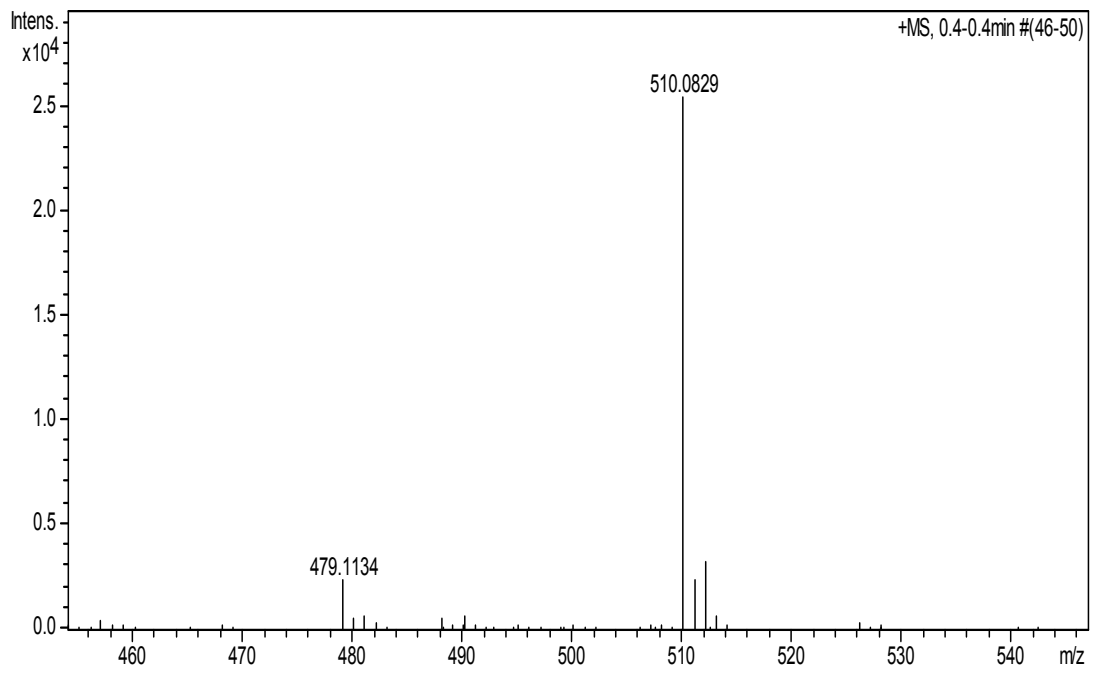

**3'-(4-Bromophenyl)-1'-(2-hydroxyphenyl)-6',7'-dihydro-1'H-spiro[indene-2,2'-pyrazolo[1,2-a]pyrazole]-1,3,5'(3'H)-trione (1q):**

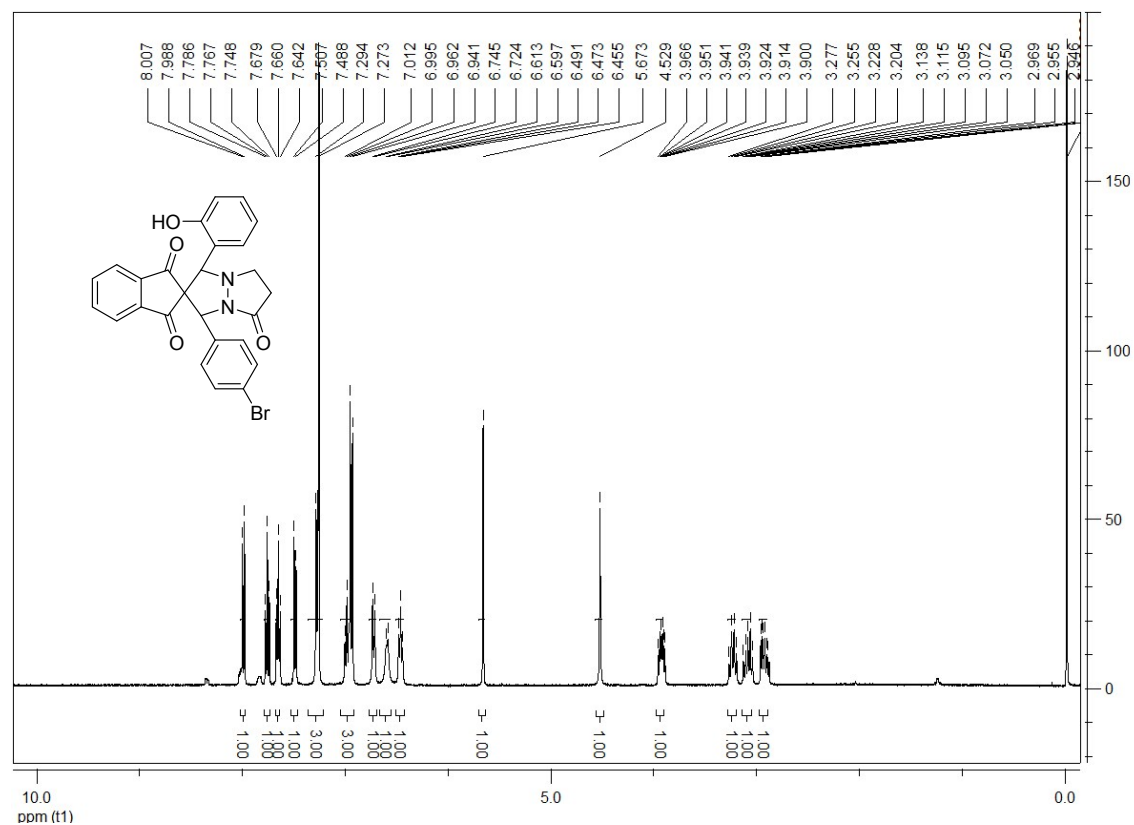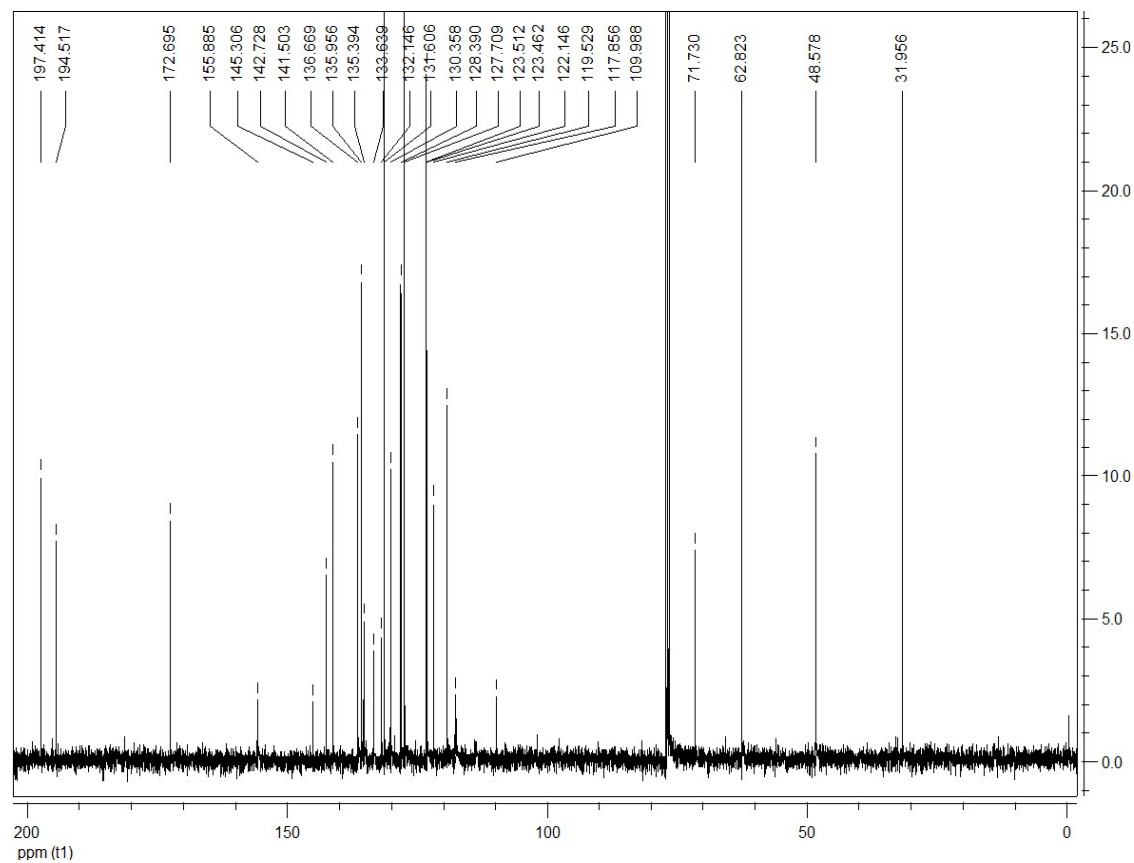

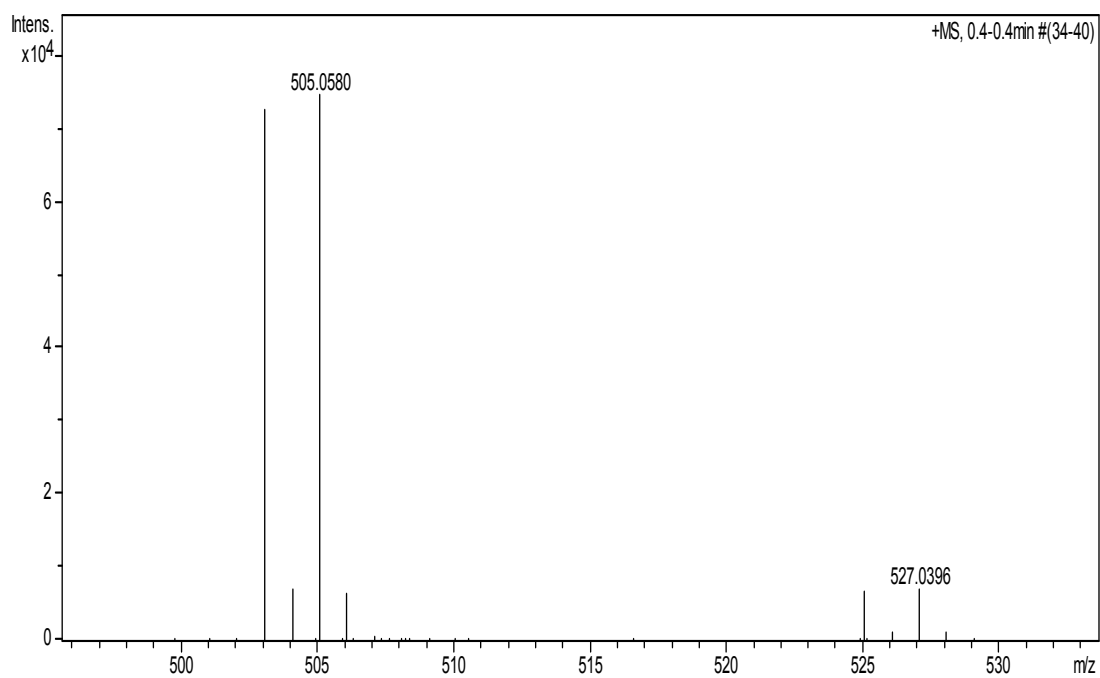

**1-Benzyl-5-methyl-3'-(4-methylbenzoyl)-1'-phenyl-6',7'-dihydro-1'H-spiro[indoline-3,2'-pyrazolo[1,2-a]pyrazole]-2,5'(3'H)-dione (2a):**

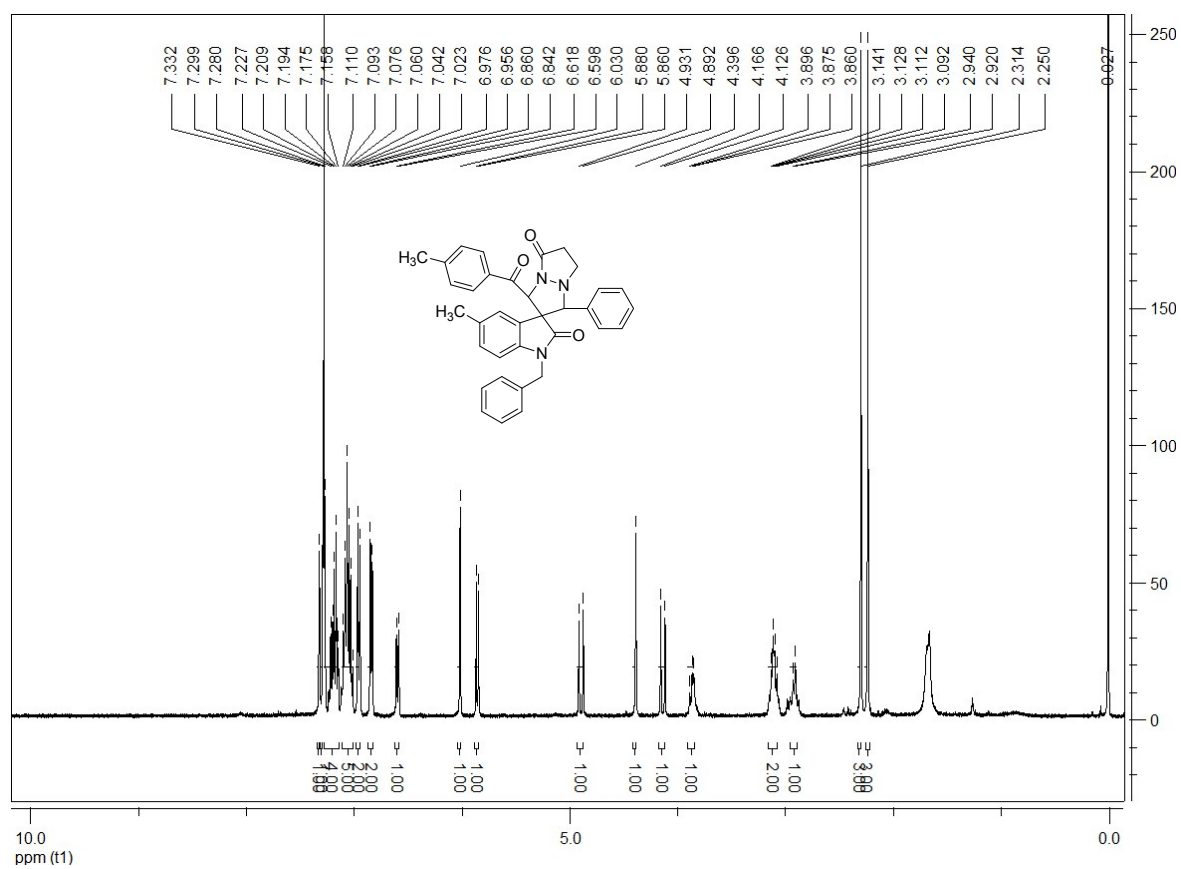

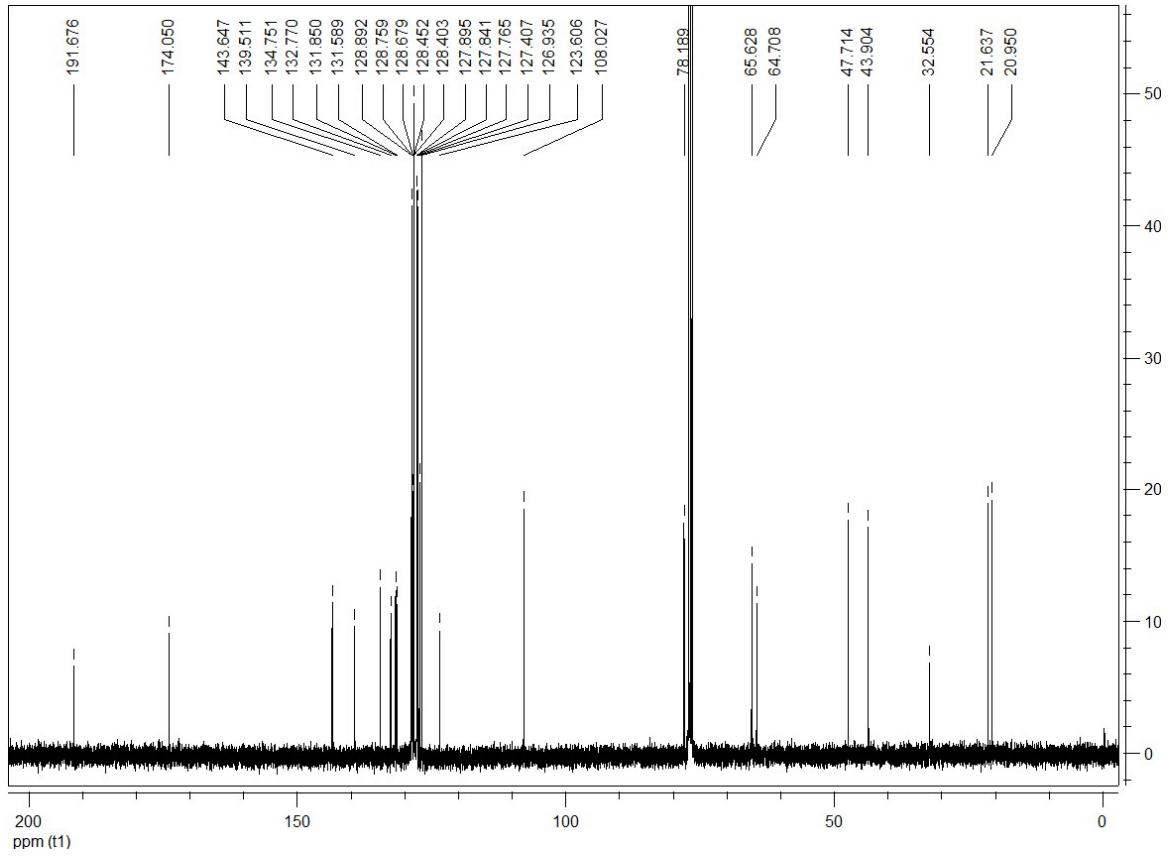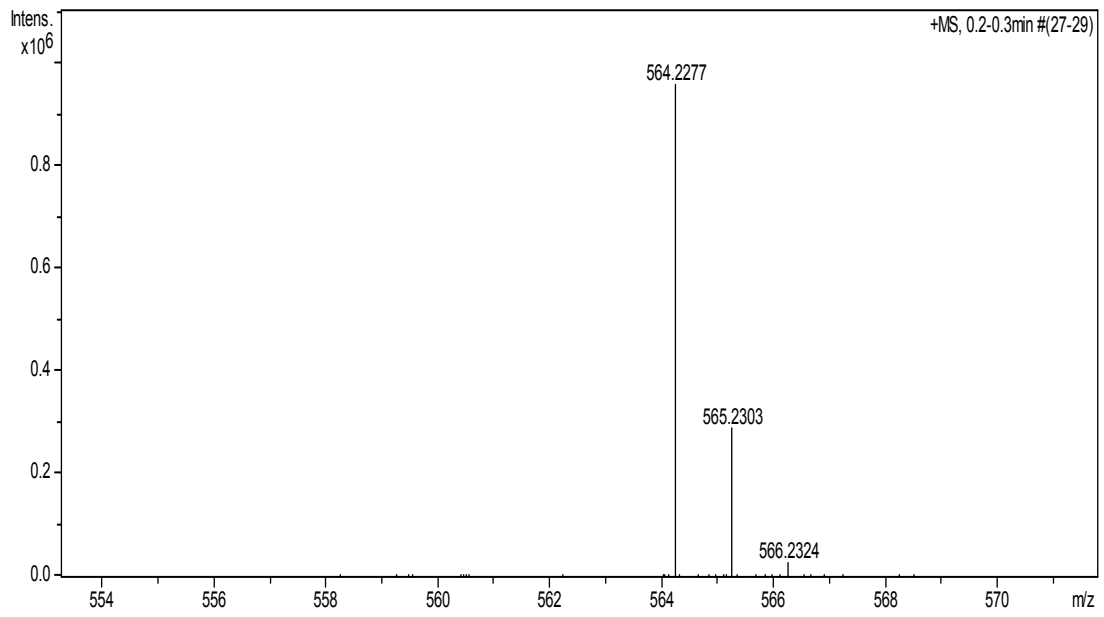

**1-Benzyl-5-chloro-3'-(4-methylbenzoyl)-1'-phenyl-6',7'-dihydro-1'H-spiro[indoline-3,2'-pyrazolo[1,2-a]pyrazole]-2,5'(3'H)-dione (2b):**

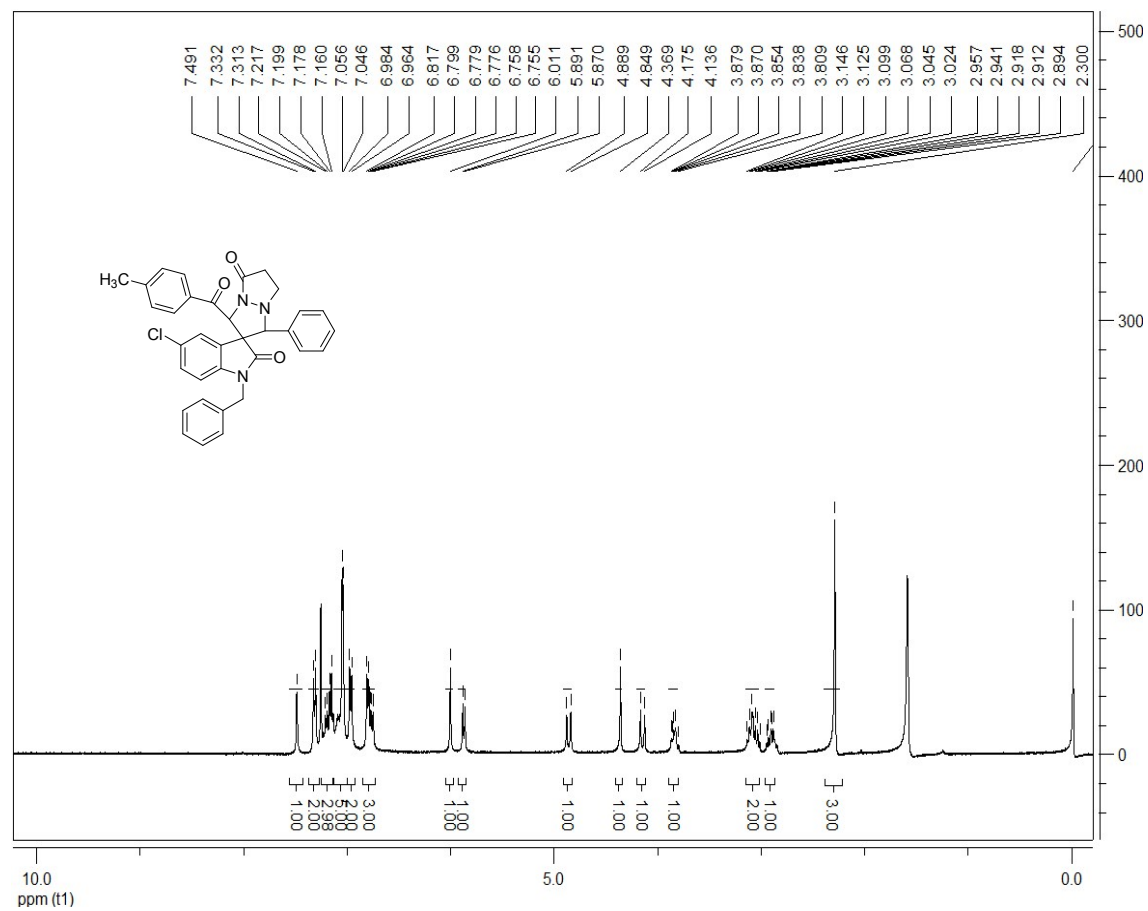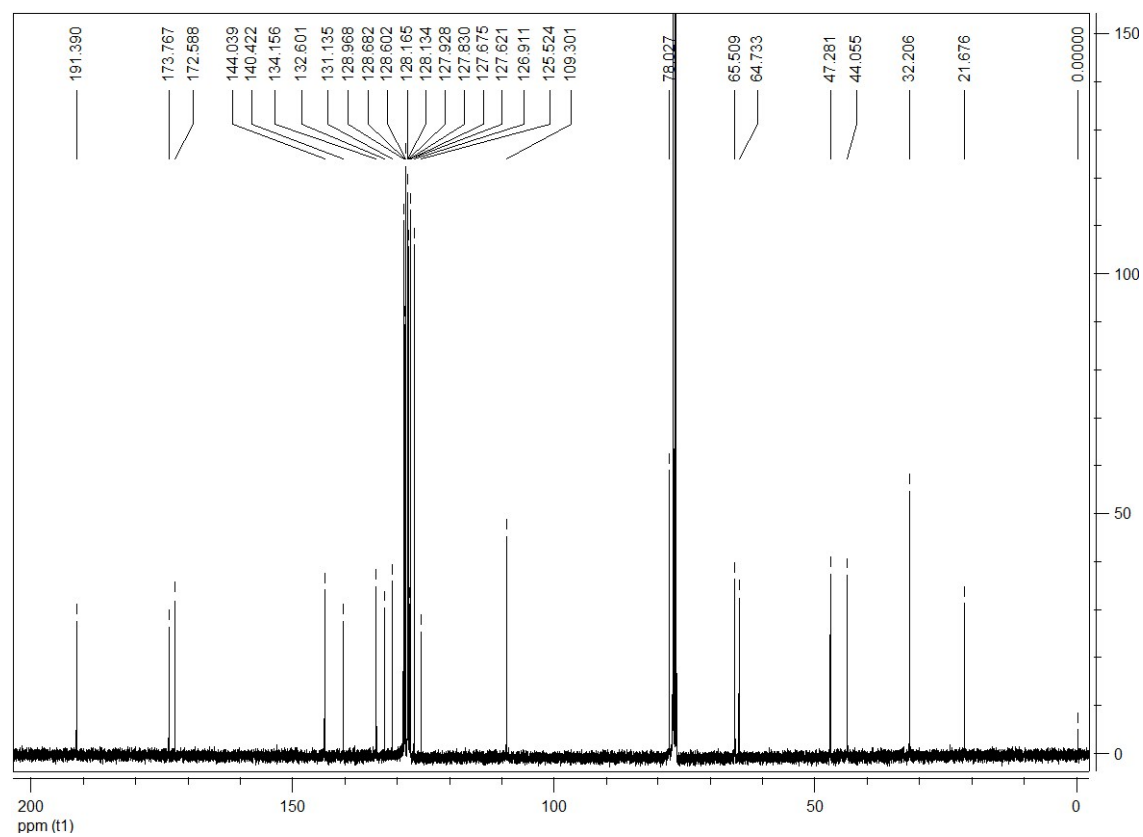

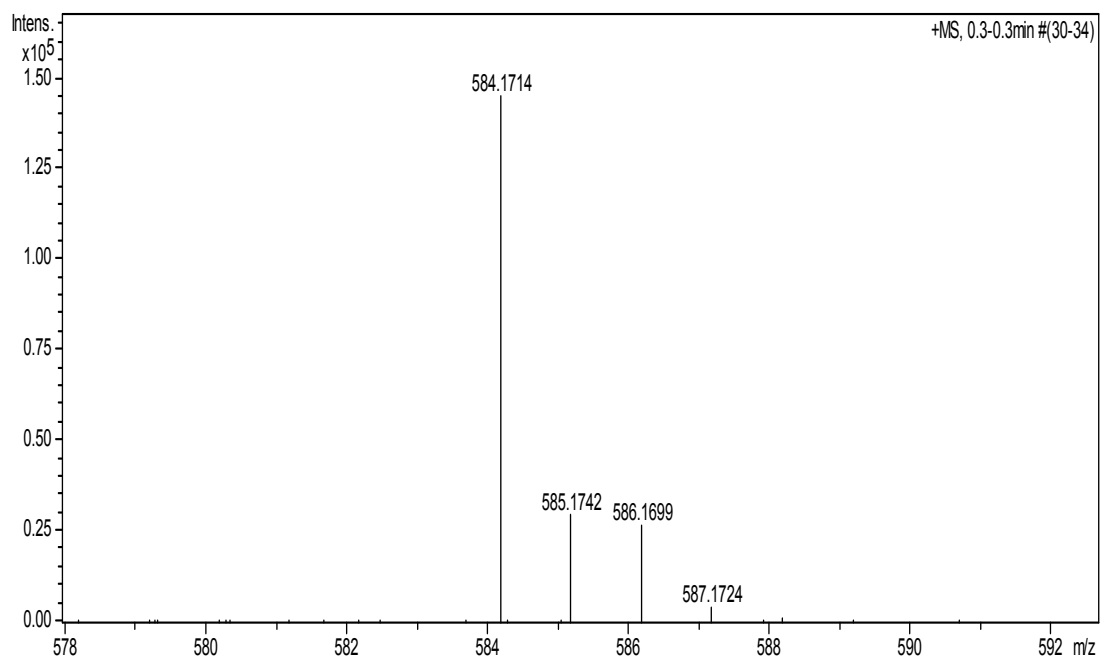

**1-Benzyl-5-chloro-3'-(4-methylbenzoyl)-1'-(p-tolyl)-6',7'-dihydro-1'H-spiro[indoline-3,2'-pyrazolo[1,2-a]pyrazole]-2,5'(3'H)-dione (2c):**

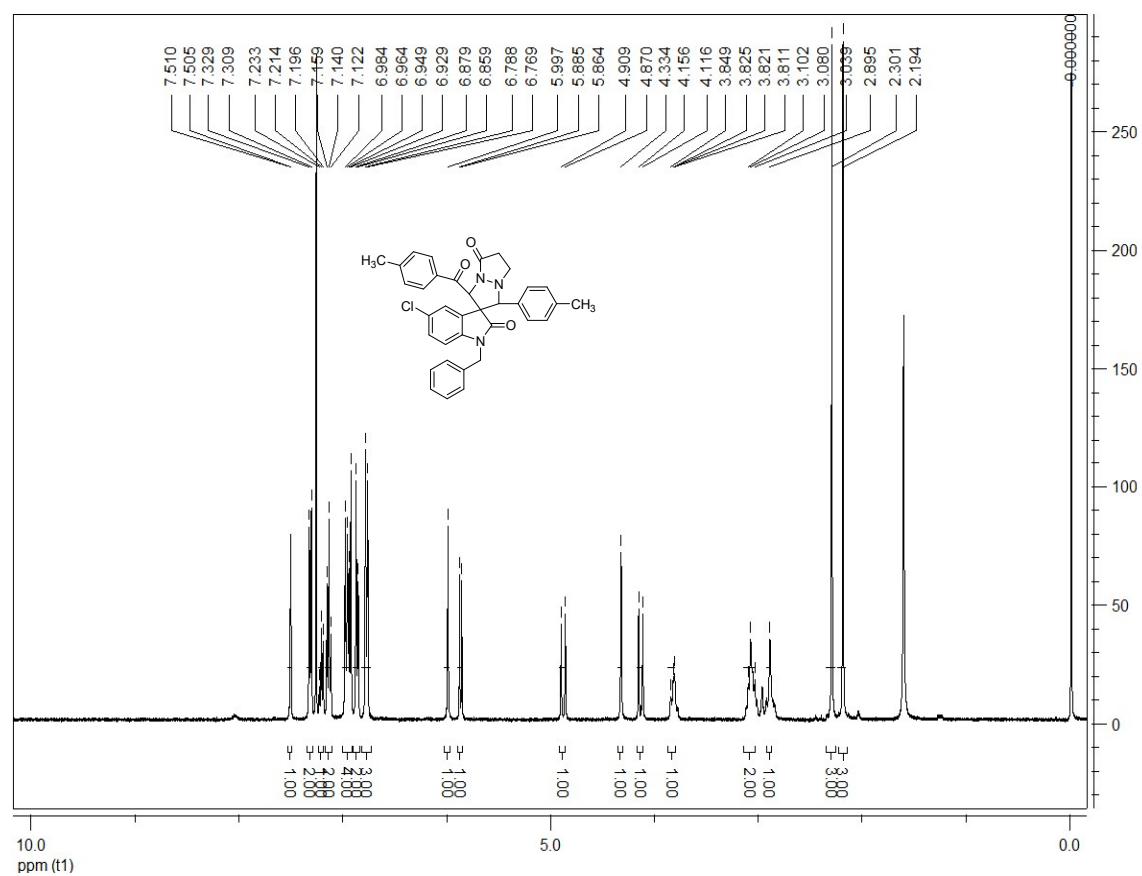



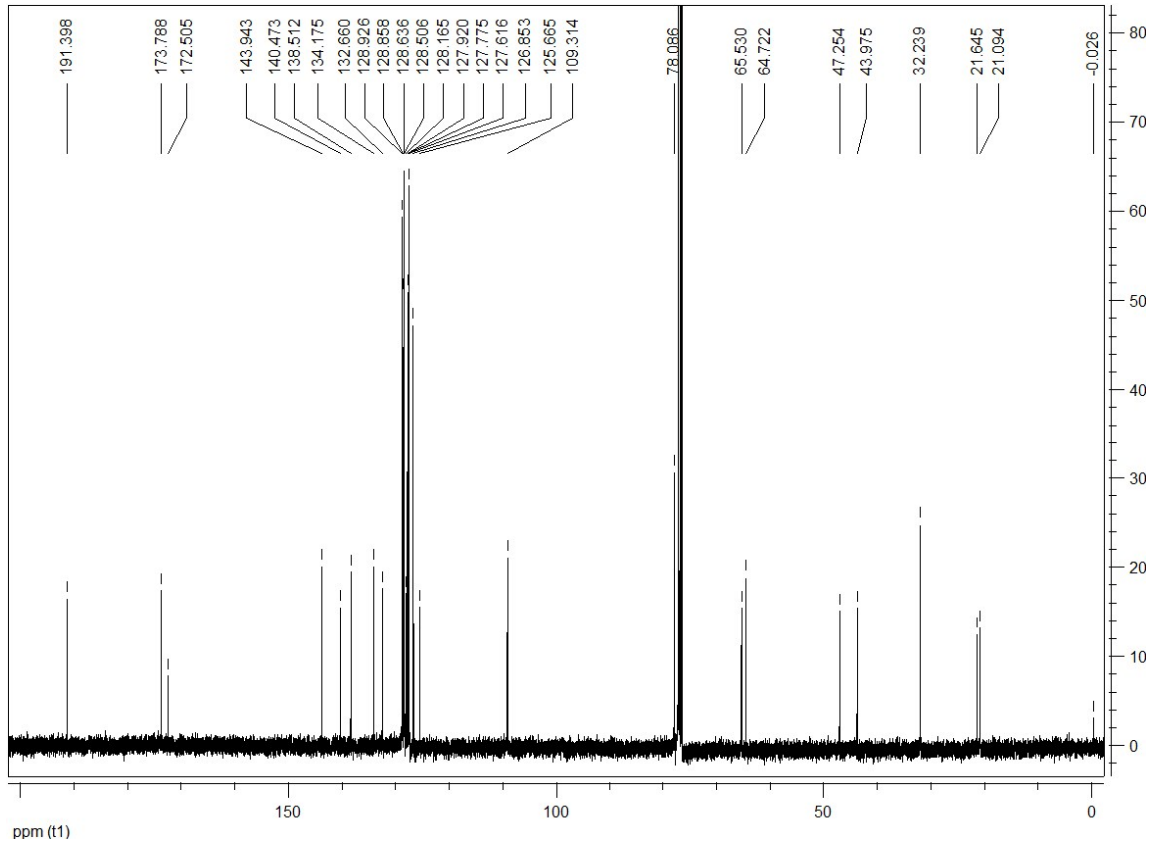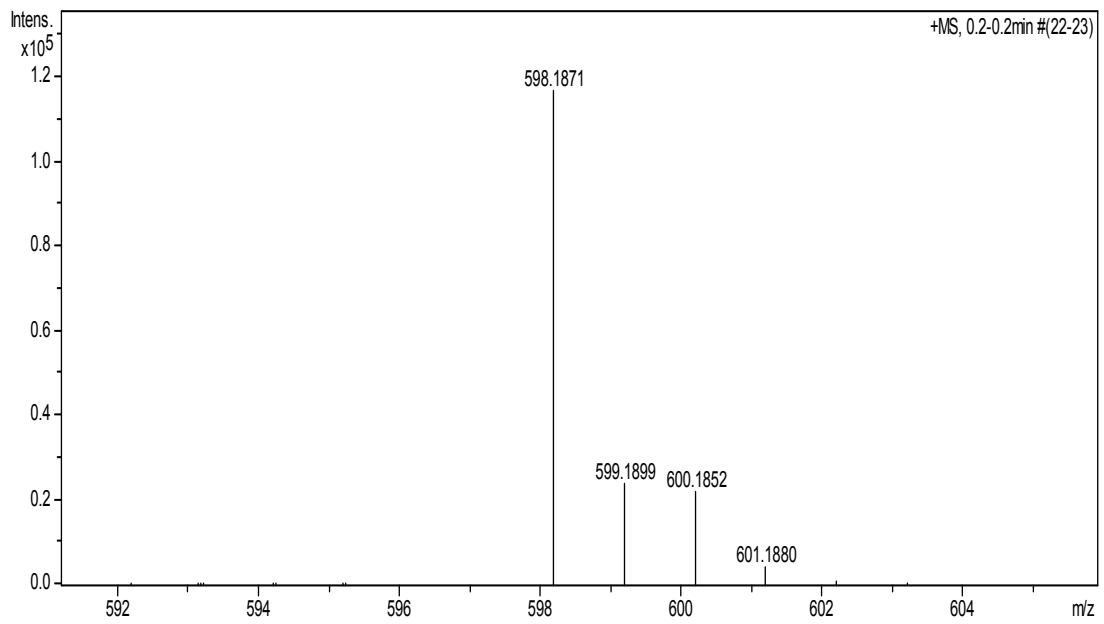

**1-Benzyl-1'-(4-methoxyphenyl)-5-methyl-3'-(4-methylbenzoyl)-6',7'-dihydro-1'H-spiro[indoline-3,2'-pyrazolo[1,2-a]pyrazole]-2,5'(3'H)-dione (2d):**

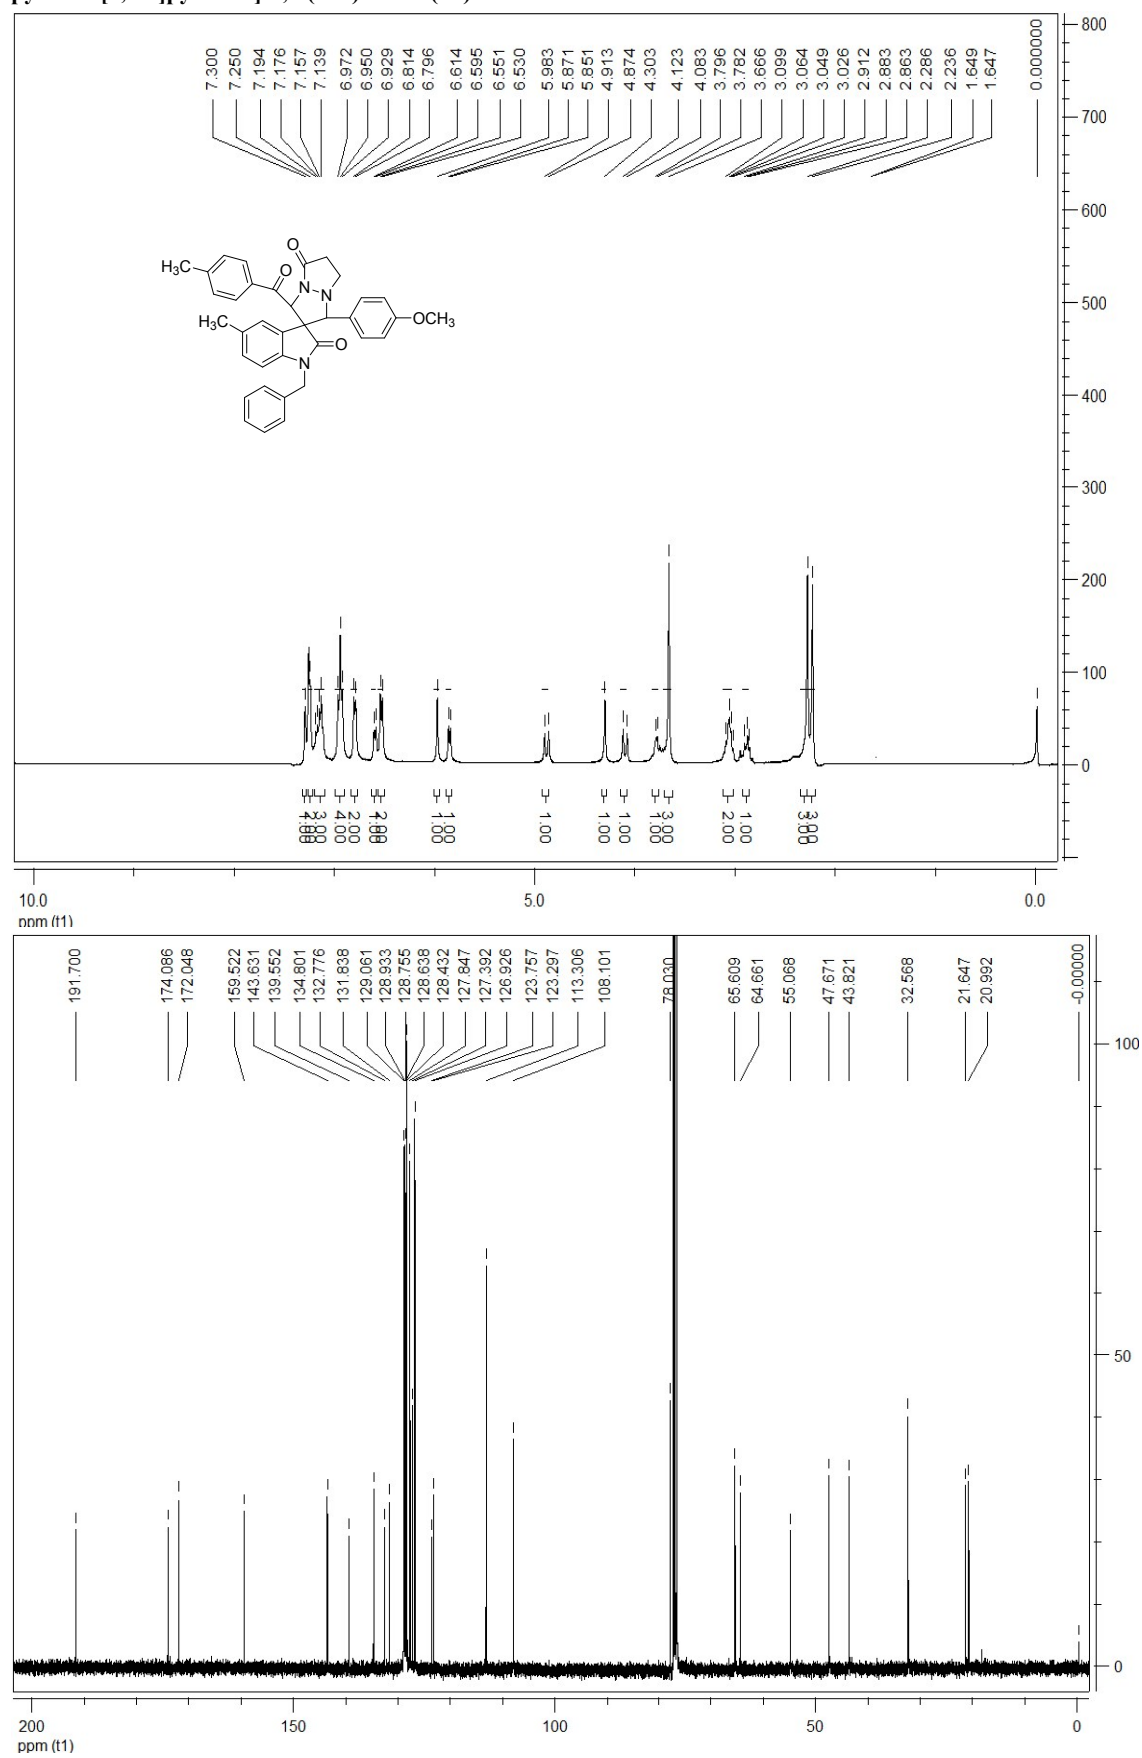

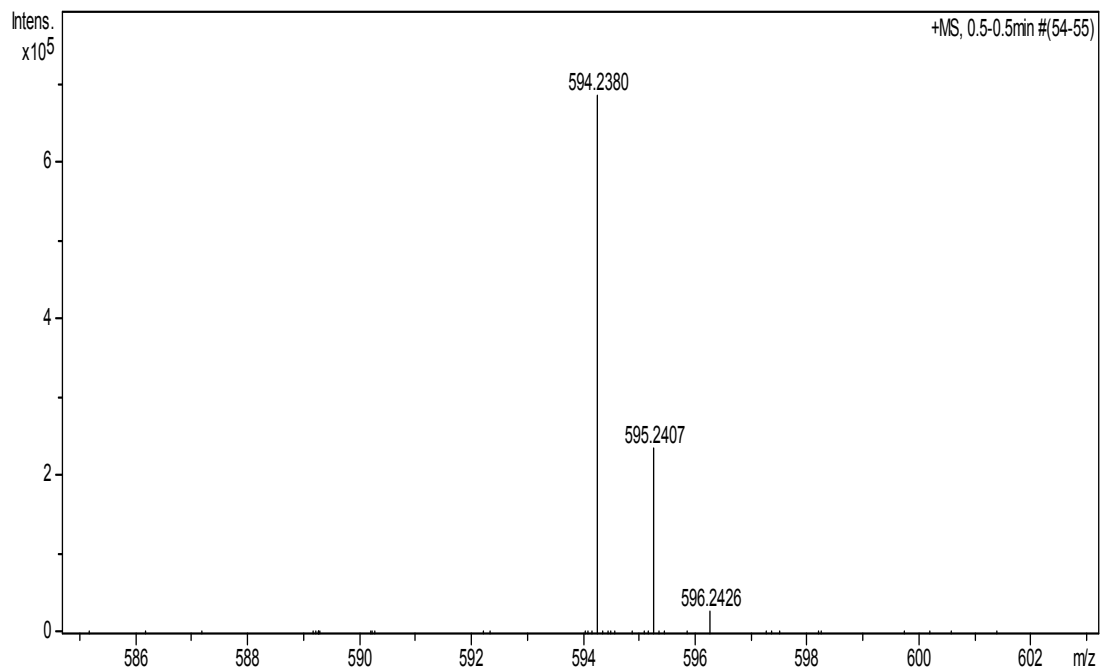

**1-Benzyl-5-chloro-1'-(4-methoxyphenyl)-3'-(4-methylbenzoyl)-6',7'-dihydro-1'H-spiro[indoline-3,2'-pyrazolo[1,2-a]pyrazole]-2,5'(3'H)-dione (2e):**

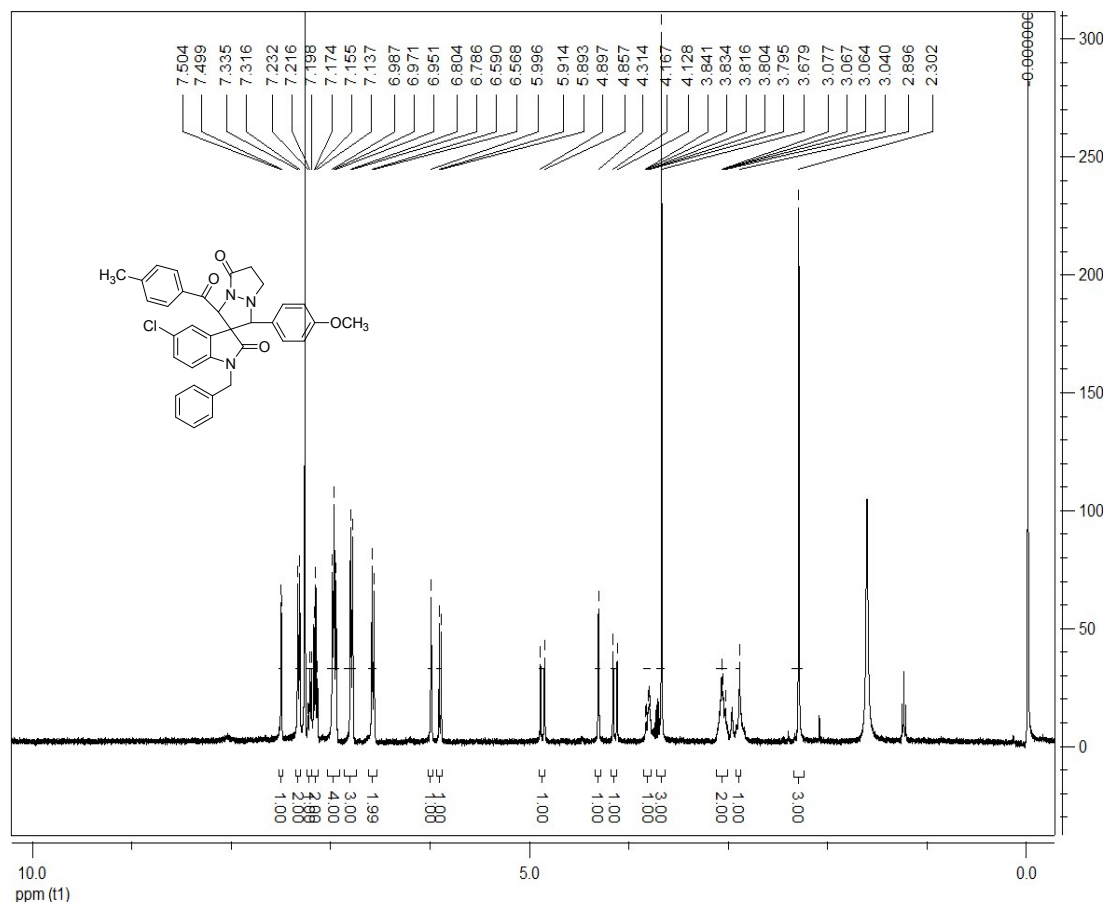

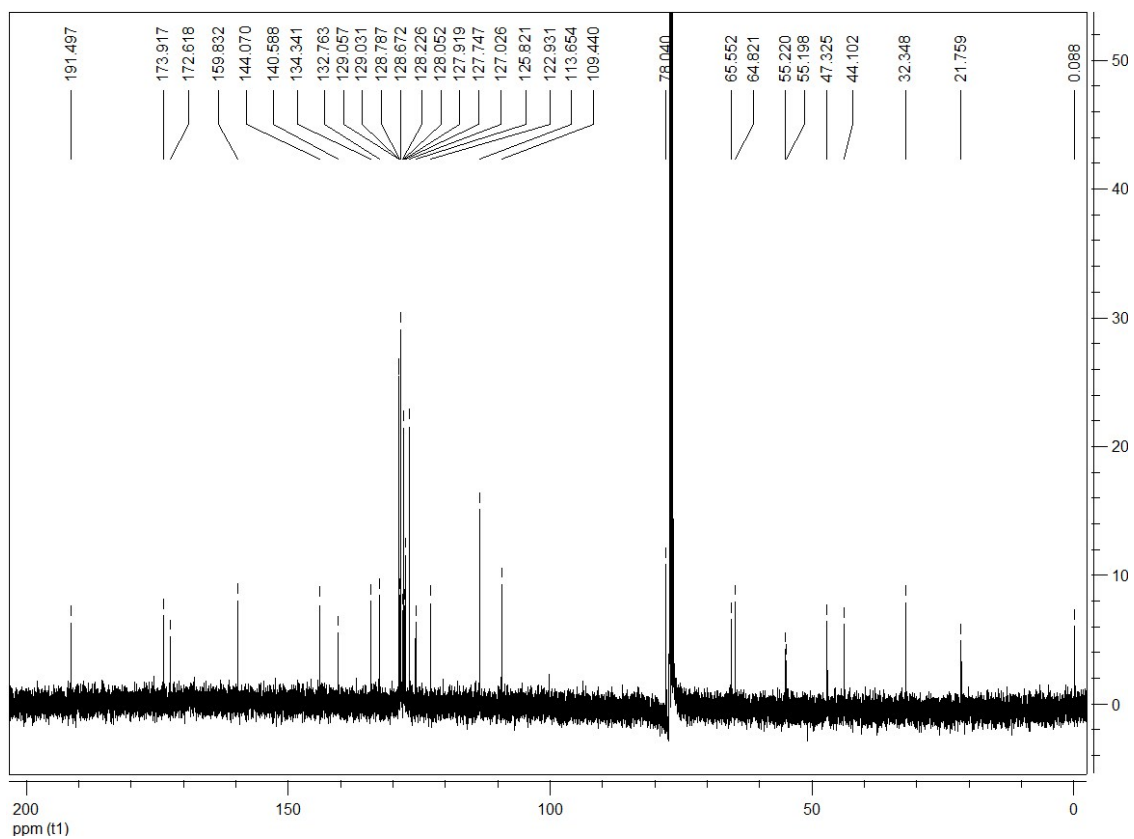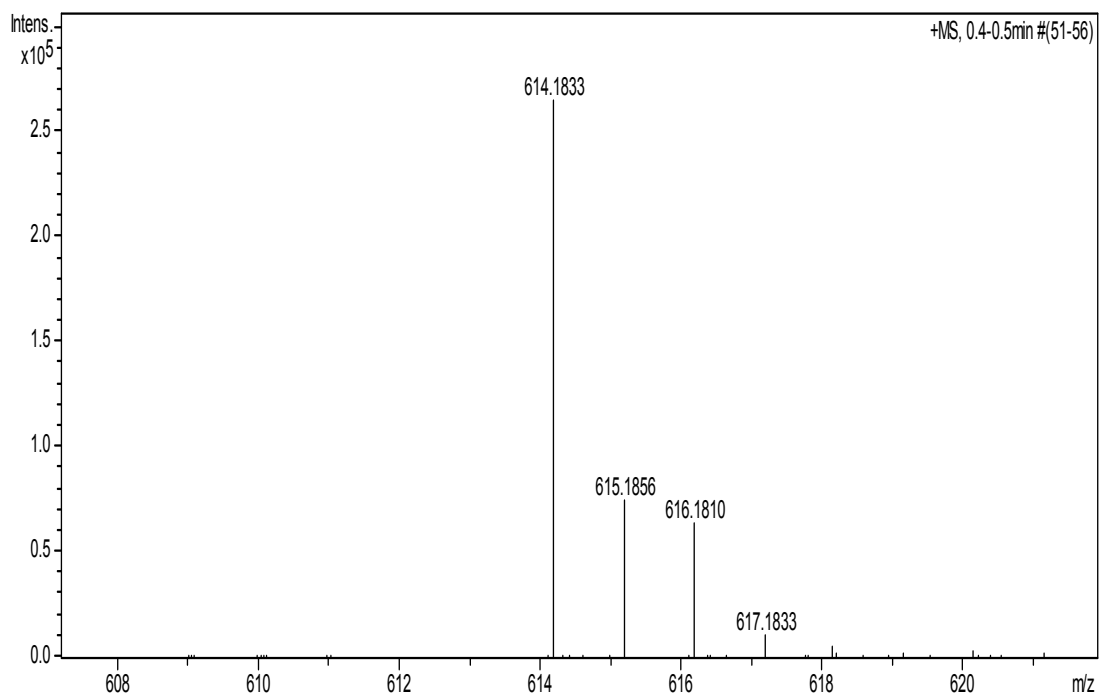

**1-Benzyl-5-chloro-1'-(4-chlorophenyl)-3'-(4-methylbenzoyl)-6',7'-dihydro-1'H-spiro[indoline-3,2'-pyrazolo[1,2-a]pyrazole]-2,5'(3'H)-dione (2f):**

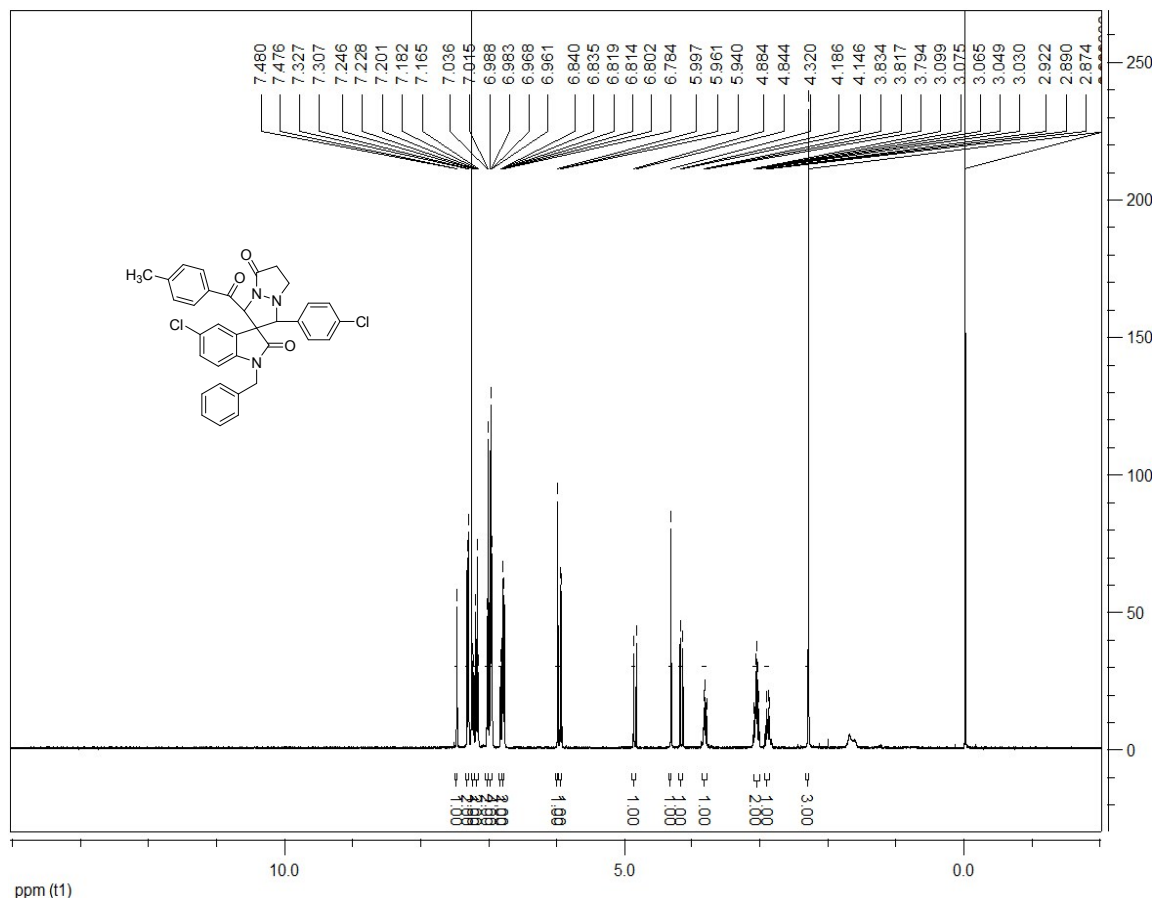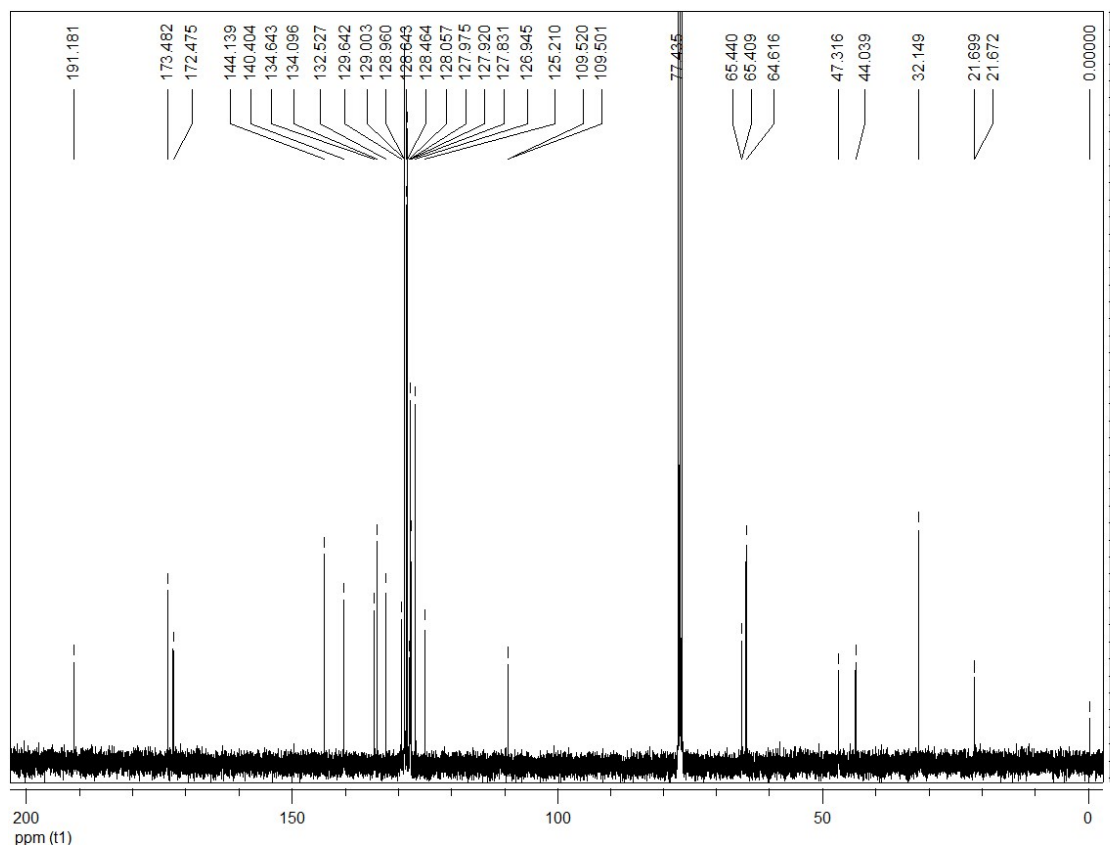

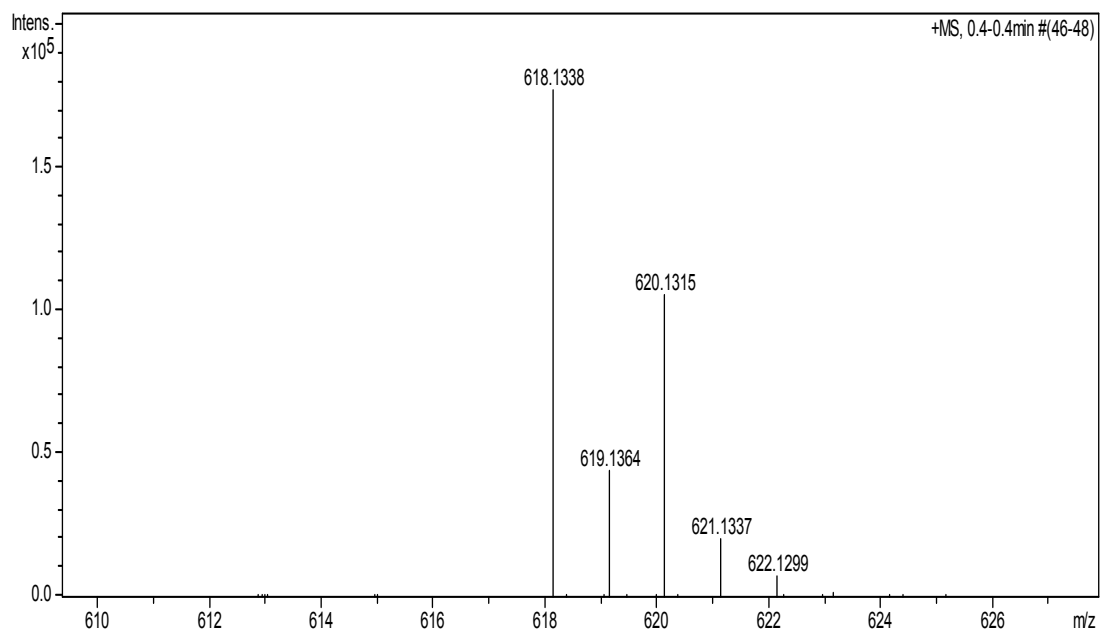

**1-Benzyl-1'-(4-bromophenyl)-5-methyl-3'-(4-methylbenzoyl)-6',7'-dihydro-1'H-spiro[indoline-3,2'-pyrazolo[1,2-a]pyrazole]-2,5'(3'H)-dione (2g):**

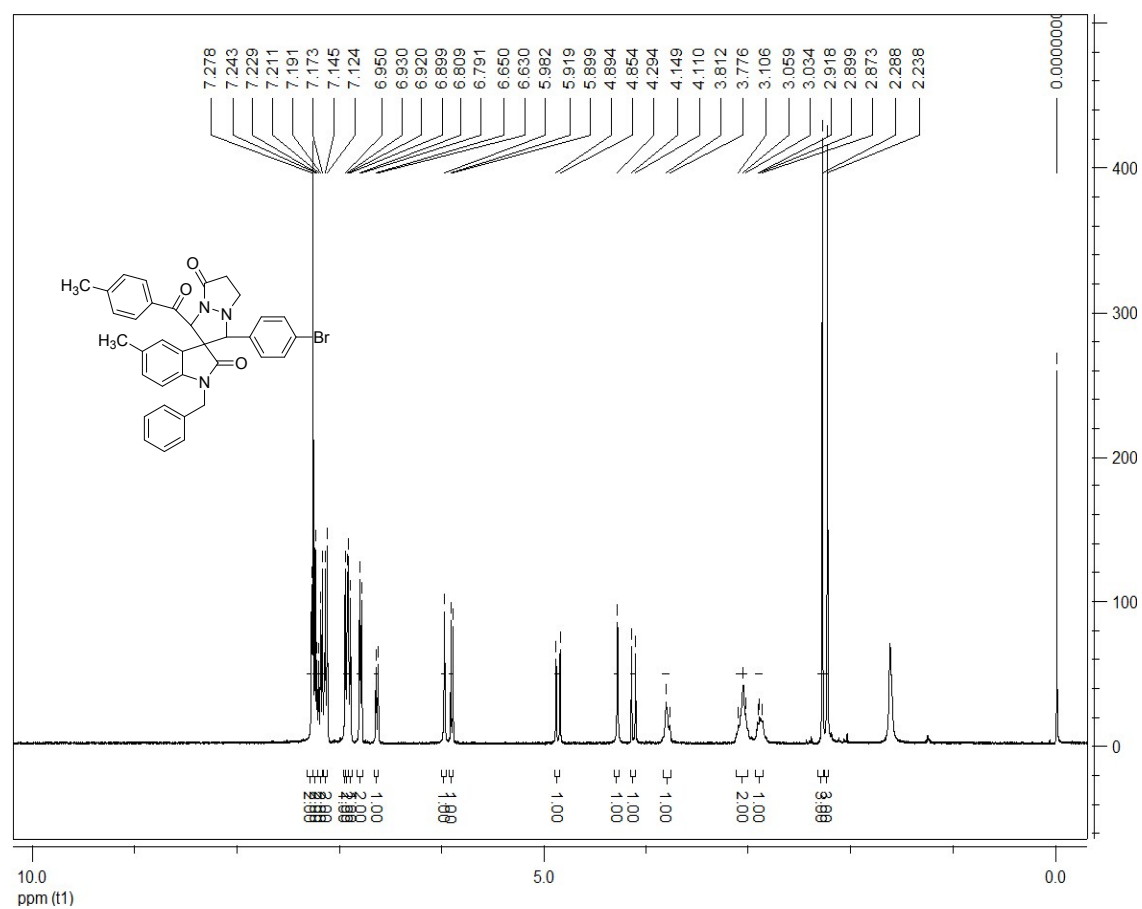

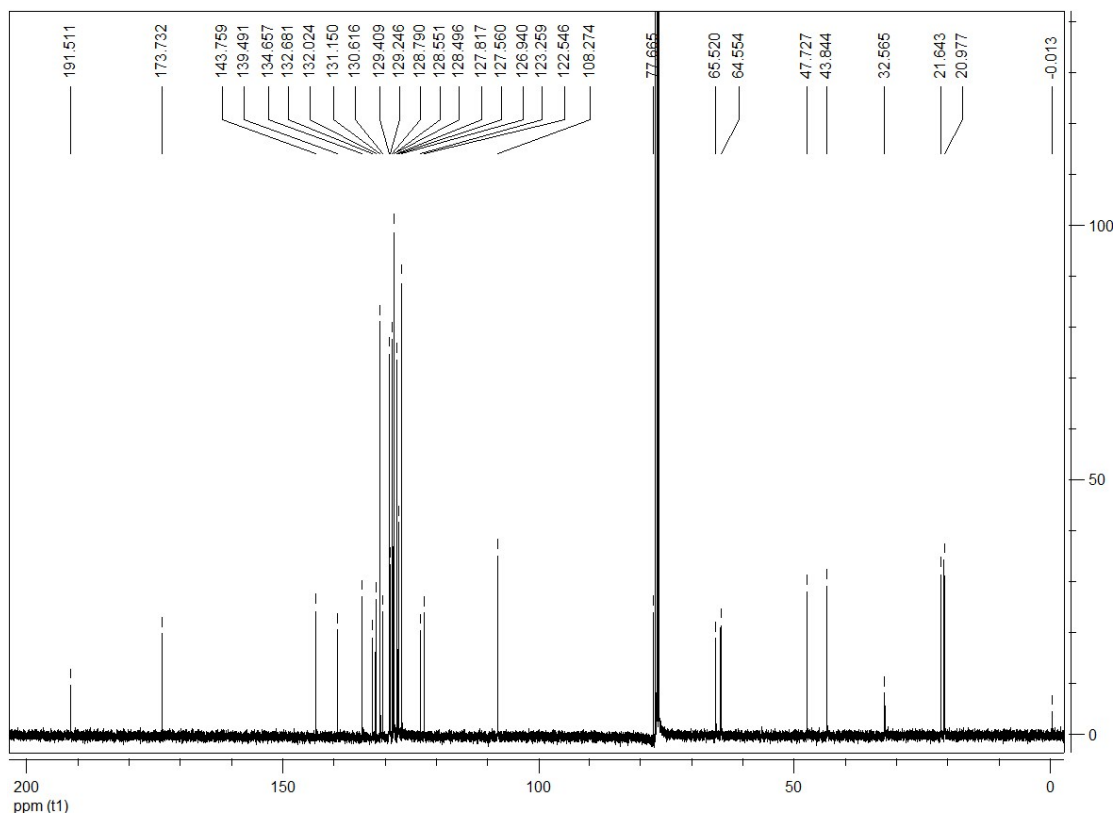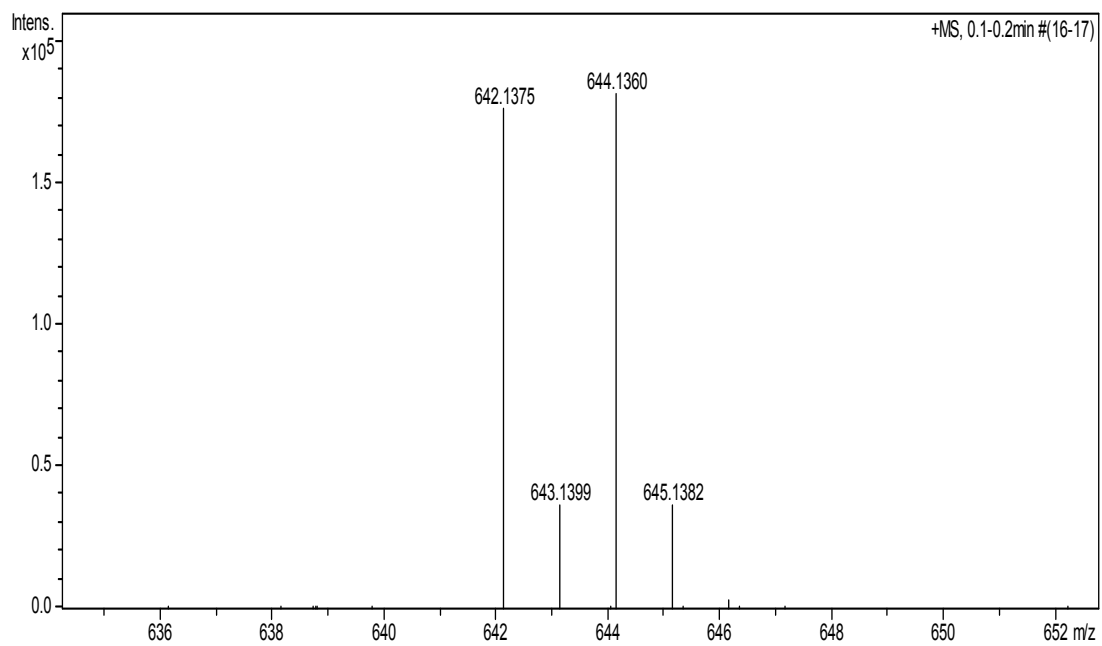

**1'-(4-Bromophenyl)-3'-(4-chlorobenzoyl)-5-methyl-6',7'-dihydro-1'H-spiro[indoline-3,2'-pyrazolo[1,2-a]pyrazole]-2,5'(3'H)-dione (2h):**

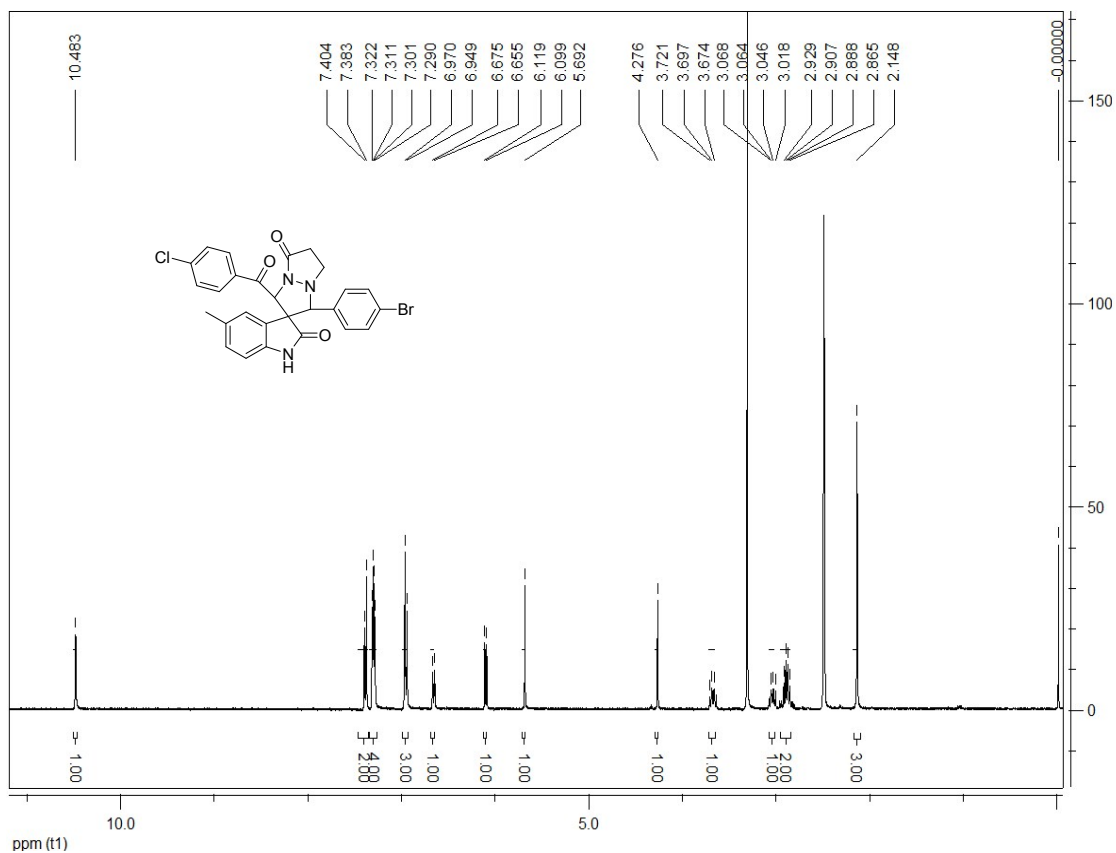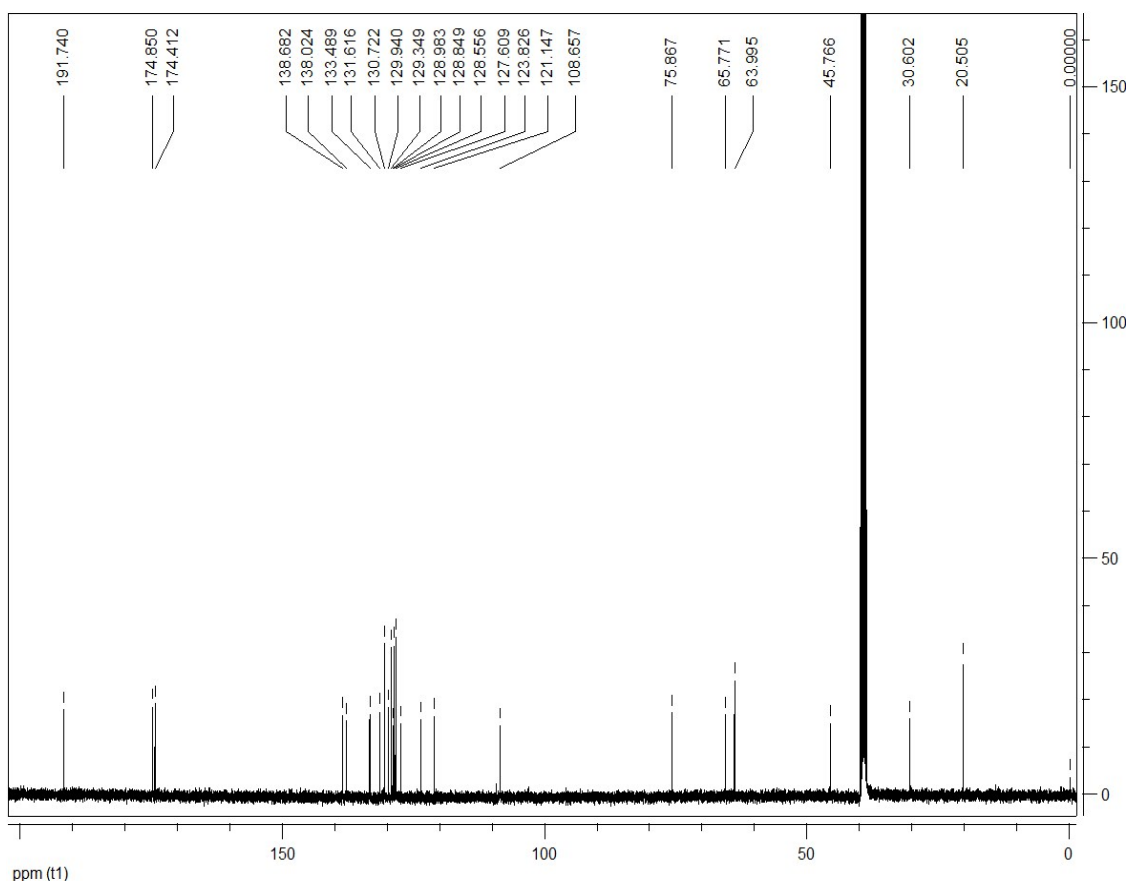



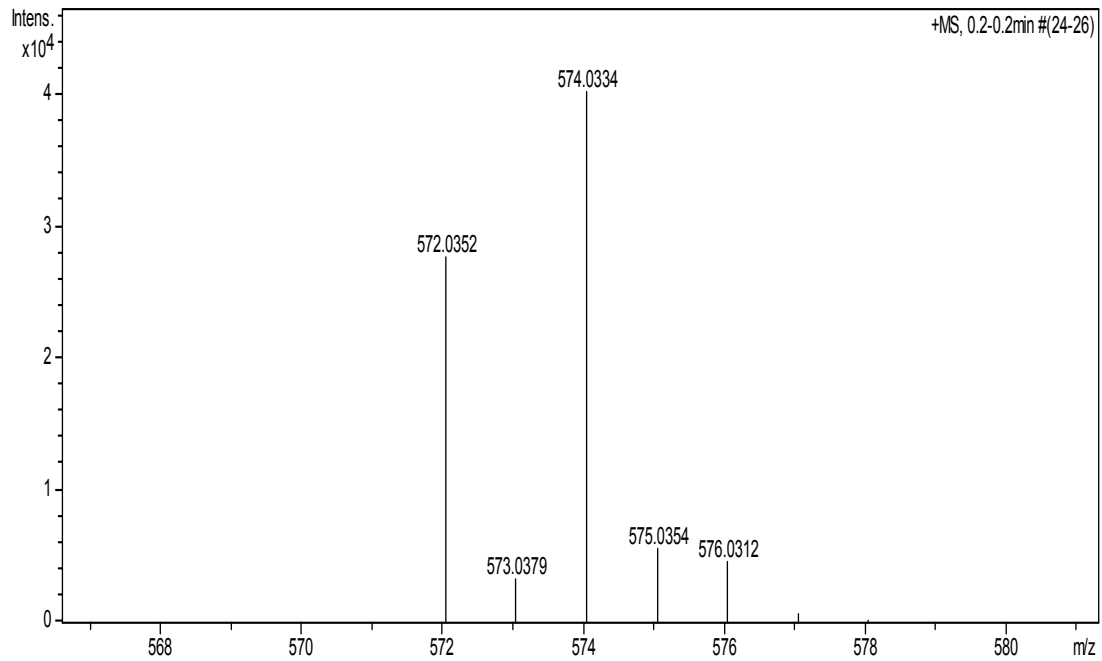

**1-Benzyl-1'-(4-bromophenyl)-5-chloro-3'-(4-methylbenzoyl)-6',7'-dihydro-1'H-spiro[indoline-3,2'-pyrazolo[1,2-a]pyrazole]-2,5'(3'H)-dione (2i):**

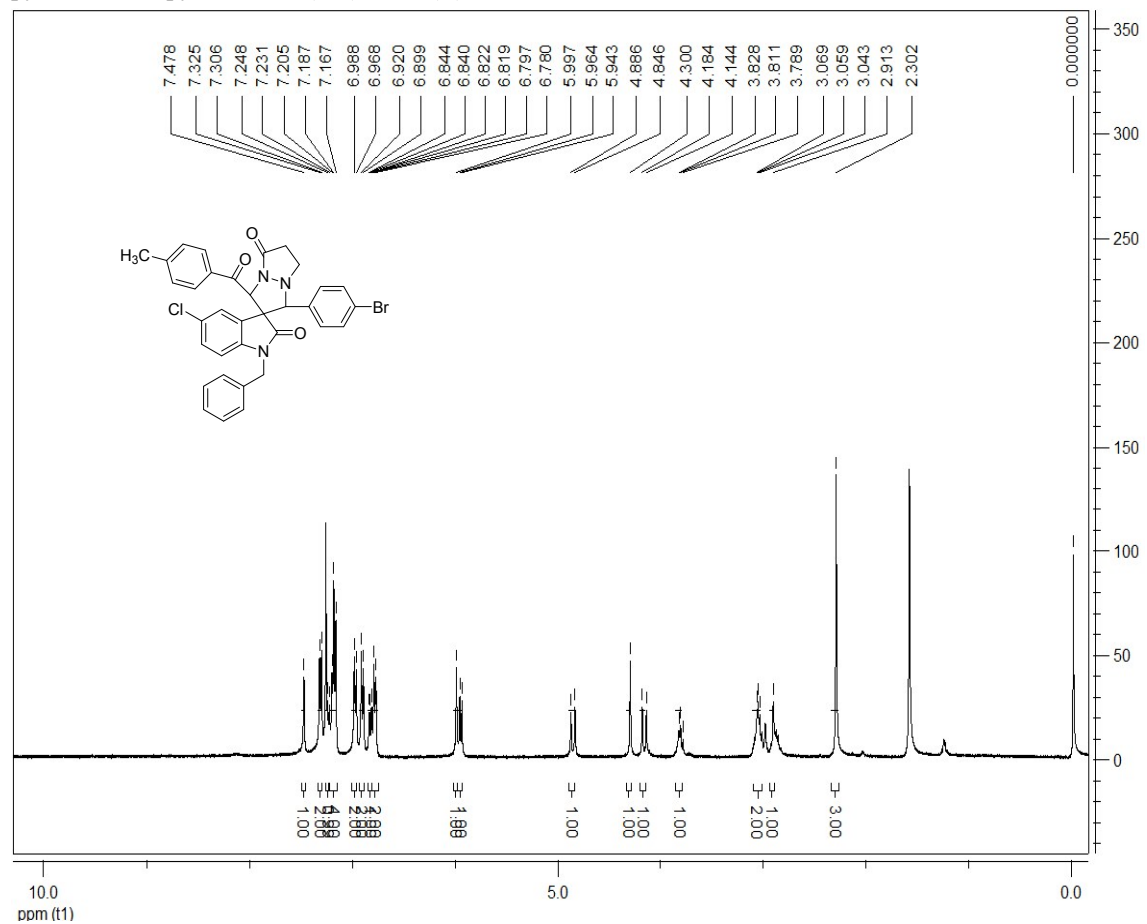

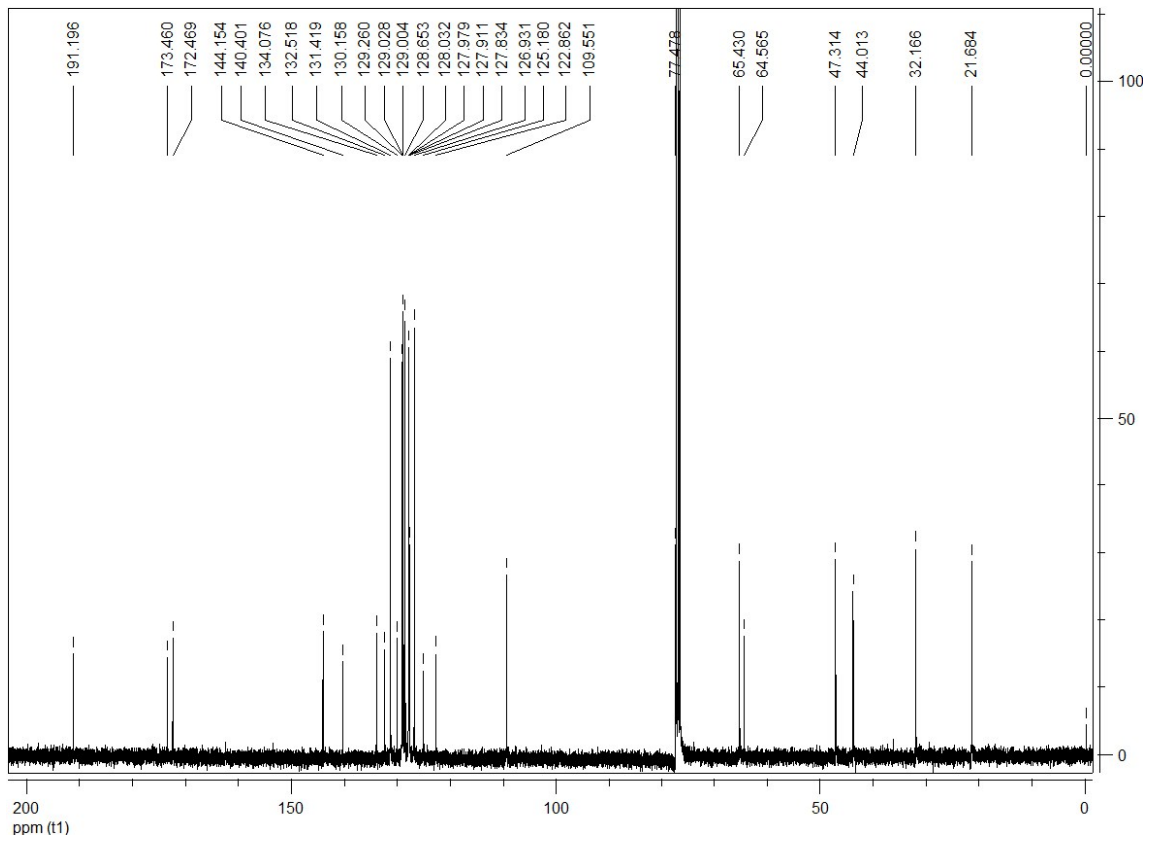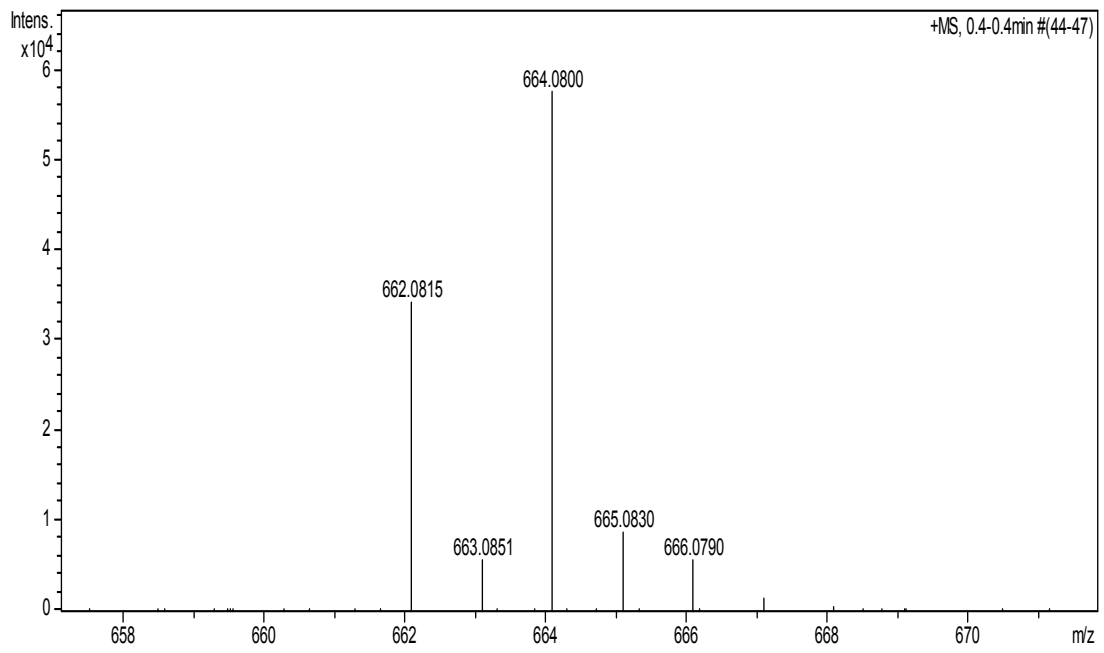

**1-Benzyl-1'-(4-bromophenyl)-5-chloro-3'-(4-chlorobenzoyl)-6',7'-dihydro-1'H-spiro[indoline-3,2'-pyrazolo[1,2-a]pyrazole]-2,5'(3'H)-dione (2j):**

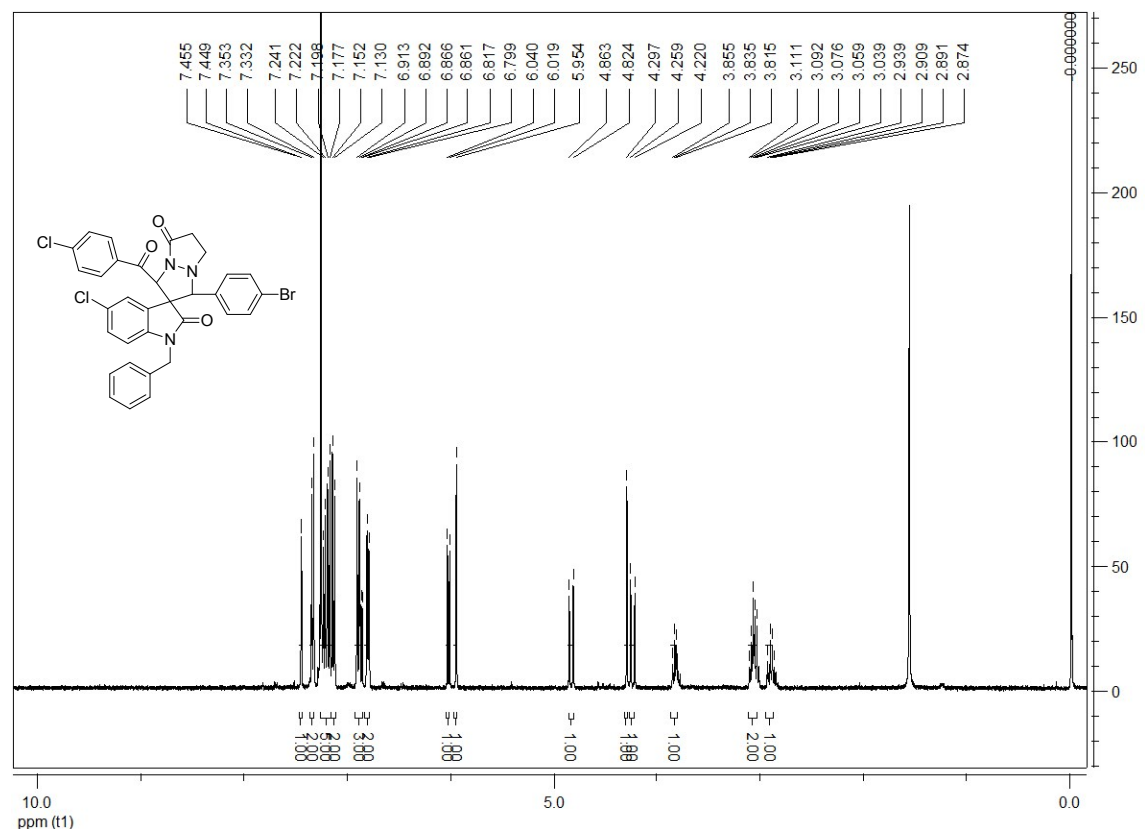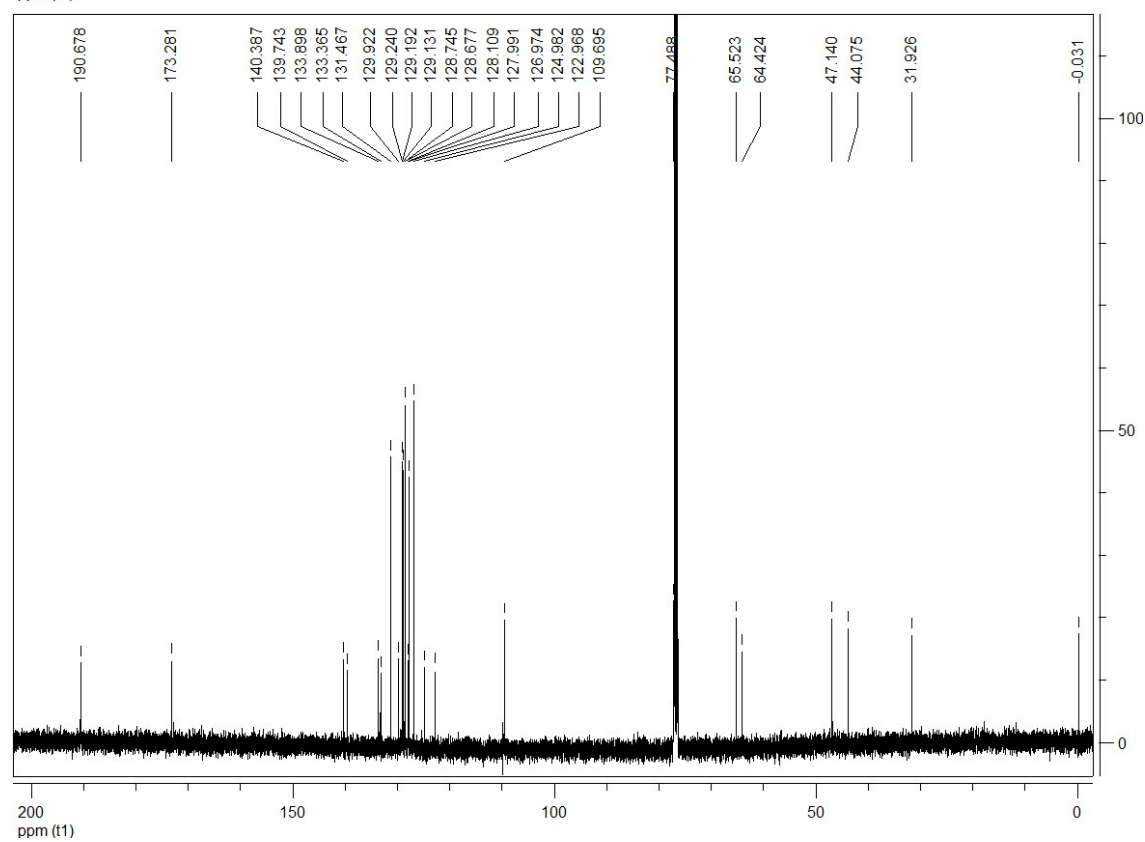

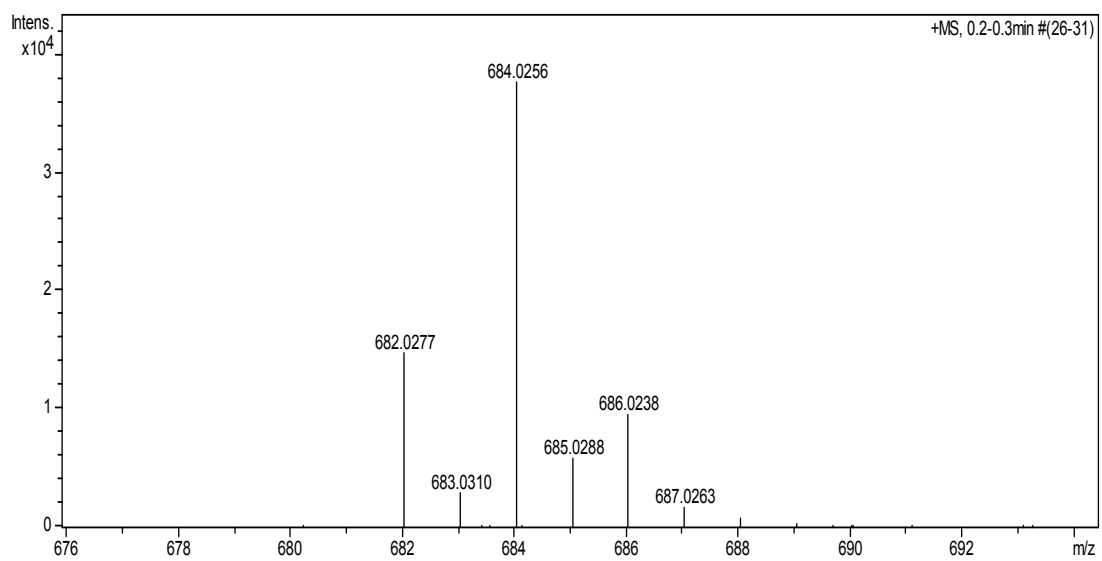

Supplement: c6ra02358d1.pdf [file c6ra02358d1.pdf]
